# Supplementary material for: A gene regulation model reveals an ancestral adaptation response to particulate exposure triggered by nanomaterials
Source: Research Square preprint supplement (doi:10.21203/rs.3.rs-1547187/v1), 2022-04-12
Supplement: Supplementary file 1 [file 31bd45bbf95e6f436dc6bd66.pdf]

Table S3: GSEA results of the meta-analysis rank for each database

| MSigDB                                               |         |
|------------------------------------------------------|---------|
| Pathway                                              | P-Value |
| SAMSON_APC_TARGETS_REQUIRE_MYC                       | 1.0e-04 |
| BCELL_VS_MDC_DAY7_FLU_VACCINE_DN                     | 1.0e-04 |
| TCONV_VS_TREG_2H_CULTURE_DN                          | 1.0e-04 |
| IL4_VS_IL4_AND_ROSIGLITAZONE_STIM_MACROPHAGE_6H_UP   | 1.0e-04 |
| ALTERNATEVELY_ACT_M2_VS_CMYC_INHIBITED_MACROPHAGE_DN | 1.0e-04 |
| IRON_ION_BINDING                                     | 1.0e-04 |
| INCORPORATION_OR_REDUCTION_OF_MOLECULAR_OXYGEN       | 1.0e-04 |
| T_LYMPHOCYTES_ANERGY                                 | 1.0e-04 |
| 2_OXOGLUTARATE_DEPENDENT_DIOXYGENASE_ACTIVITY        | 1.0e-04 |
| MIR2467_5P                                           | 2.0e-04 |
| GSE39022_LN_VS_SPLEEN_DC_UP                          | 2.0e-04 |
| GSE39864_WT_VS_GATA3_KO_TREG_UP                      | 2.0e-04 |
| DIOXYGENASE_ACTIVITY                                 | 2.0e-04 |
| PROTEIN_HYDROXYLATION                                | 2.0e-04 |
| MIR938                                               | 4.0e-04 |
| CSR_LATE_UP.V1_UP                                    | 5.0e-04 |
| GSE29618_PDC_VS_MDC_DN                               | 5.0e-04 |
| GSE42021_TREG_PLN_VS_CD24LO_TREG_THYMUS_DN           | 5.0e-04 |
| BEIER_GLIOMA_STEM_CELL_DN                            | 5.0e-04 |
| BIOCARTA_MITOCHONDRIA_PATHWAY                        | 5.0e-04 |

| WikiPathway                                      |         |
|--------------------------------------------------|---------|
| Pathway                                          | P-Value |
| OXIDATIVE_DAMAGE                                 | 1.6e-03 |
| APOPTOSIS_MODULATION_BY_HSP70                    | 1.7e-03 |
| NANOMATERIAL_INDUCED_APOPTOSIS                   | 1.7e-03 |
| SARS_CORONAVIRUS_AND_INNATE_IMMUNITY             | 2.8e-03 |
| SMALL_CELL_LUNG_CANCER                           | 4.1e-03 |
| ALZHEIMERS_DISEASE                               | 4.3e-03 |
| APOPTOSIS_MODULATION_AND_SIGNALING               | 4.5e-03 |
| APOPTOSIS                                        | 5.3e-03 |
| INDUCTION_OF_HEAT_SHOCK_POROTEINS                | 6.3e-03 |
| PROXIMAL_TUBULE_EPITHELIAL_KIDNEY_CELLS          | 1.4e-02 |
| INTERLUKIN11_SIGNALING_PATHWAY                   | 1.6e-02 |
| TUMOR_SUPPRESSOR_ACTIVITY_OF_SMARCB1             | 1.6e-02 |
| IL6_SIGNALING_PATHWAY                            | 2.2e-02 |
| GENES_INVOLVED_IN_MALE_INFERTILITY               | 3.5e-02 |
| GEN_INTERACTION_OF_HUMAN_CORONAVIRUSES_APOPTOSIS | 3.6e-02 |
| TNF_ALPHA_SIGNALING_PATHWAY                      | 3.7e-02 |
| AMYOTROPHIC_LATERAL_SCLEROSIS                    | 3.9e-02 |
| NONGENOMIC_ACTIONS_OF_125_DIHYDROXYVITAMIN_D3    | 4.3e-02 |
| HUMAN_CORONA_VIRUSES_INTERFERON_INDUCTION        | 4.4e-02 |
| GLYCOSILATION_AND_RELATED_CONGENITAL_DEFECTS     | 4.6e-02 |

| KEGG                                 |         |
|--------------------------------------|---------|
| Pathway                              | P-Value |
| APOPTOSIS                            | 1.2e-02 |
| PS3_SIGNALING_PATHWAY                | 1.3e-02 |
| SMALL_CELL_LUNG_CANCER               | 2.5e-02 |
| AMYOTROPHIC_LATERAL_SCLEROSIS        | 3.2e-02 |
| PATHOGENIC_ECOLI_INFECTION           | 6.5e-02 |
| JAK_STAT_SIGNALING_PATHWAY           | 7.5e-02 |
| PYRUVATE_METABOLISM                  | 7.9e-02 |
| PROTEIN_EXPORT                       | 1.0e-01 |
| ALZEHIMERS_DISEASE                   | 1.1e-01 |
| TIGHT_JUNCTION                       | 1.1e-01 |
| HUNTINGTONS_DISEASE                  | 1.2e-01 |
| PARKINSONS_DISEASE                   | 1.2e-01 |
| PHOSPHATIDYLINOSITOL_GPI_ANCHOR_BIOS | 1.2e-01 |
| TGFBETA_SIGNALING_PATHWAY            | 1.2e-01 |
| PEROXISOME                           | 1.4e-01 |
| NEUROTHROPHIN_SIGNALING_PATHWAY      | 1.4e-01 |
| ADHERENS_JUNCTION                    | 1.5e-01 |
| VASCULAR_SMOOTH_MUSCLE_CONTRACTION   | 1.5e-01 |
| VIRAL_MYOCARDITIS                    | 1.6e-01 |
| N_GLYCAN_BIOSYNTHESIS                | 1.7e-01 |

| Reactome                                         |         |
|--------------------------------------------------|---------|
| Pathway                                          | P-Value |
| TRANSCRIPTIONAL_REGULATION_BY_E2F6               | 1.0e-03 |
| INTRINSIC_PATHWAY_FOR_APOPTOSIS                  | 1.1e-03 |
| INTERFERON_ALPHA_BETA_SIGNALING                  | 1.5e-03 |
| INTERLEUKIN_4_AND_INTERLEUKIN_13_SIGNALING       | 1.7e-03 |
| INTERLEUKIN_12_SIGNALING                         | 2.5e-03 |
| INTERLEUKIN_12_FAMILY_SIGNALING                  | 2.6e-03 |
| TP53_REGULATES_TRANSCRIPTION_OF_CELL_DEATH_GENES | 3.7e-03 |
| POTENTIAL_THERAPEUTICS_FOR_SARS                  | 6.6e-03 |
| PROGRAMMED_CELL_DEATH                            | 7.2e-03 |
| INTERFERON_SIGNALING                             | 1.3e-02 |
| RMTS_METHYLATE_HISTON_ARGININES                  | 1.4e-02 |
| FATTY_ACYL_COA_BIOSYNTHESIS                      | 1.5e-02 |
| DNA_DAMAGE_TELOMER_STRESS_INDUCED_SENESCENCE     | 2.0e-02 |
| PROCESSING_OF_DNA_DOUBLE_STRAND_BREAK_ENDS       | 2.3e-02 |
| G2_M_DNA_DAMAGE_CHECKPOINT                       | 2.3e-02 |
| PROCESSING_OF_CAPPED_INTRONLESS_PRE_MRNA         | 2.8e-02 |
| PROCESSING_OF_INTRONLESS_PRE_MRNA                | 2.8e-02 |
| P75_NTR_RECEPTOR_MEDIATED_SIGNALING              | 3.2e-02 |
| MAPK_FAMILY_SIGNALING_CASCADES                   | 3.3e-02 |
| CELLULAR_RESPONSE_TO_HYPOXIA                     | 3.5e-02 |

| Gene Ontology                                    |          |
|--------------------------------------------------|----------|
| Pathway                                          | P-Value  |
| IRON_ION_BINDING                                 | 1.0e-04  |
| INCORPORATION_OR_REDUCTION_OF_MOLECULAR_OXYGEN   | 1.0e-04  |
| 2_OXOGLUTARATE_DEPENDENT_DIOXYGENASE_ACTIVITY    | 1.0e-04  |
| DIOXYGENASE_ACTIVITY                             | 2.0e-04  |
| PROTEIN_HYDROXYLATION                            | 3.0e-04  |
| DNA_CATABOLIC_PROCESS                            | 5.0e-04  |
| REGULATOR_ACTIVITY_INVOLVED_IN_APOPTOTIC_PROCESS | 5.0e-04  |
| G0_TO_G1_TRANSITION                              | 6.0e-04  |
| DNA_CATABOLIC_PROCESS_ENDONUCLEOLYTIC            | 8.0e-04  |
| NEURON_APOPTOTIC_PROCESS                         | 1.3e-03  |
| REGULATION_OF_NECROTIC_CELL_DEATH                | 2.4e-03  |
| RESPONSE_TO_INTERLEUKIN_12                       | 2.7e-03  |
| REGULATION_OF_PROGRAMMED_NECROTIC_CELL_DEATH     | 2.9e-03  |
| RESPONSE_TO_ENDOPLASMATIC_RETICULUM_STRESS       | 3,00E-03 |
| NUCLEIC_ACID_PHOSPHODIESTER_BOND_HYDROLISIS      | 3.1e-03  |
| IDENTICAL_PROTEIN_BINDING                        | 3.3e-03  |
| PROTEIN_HOMODIMERIZATION_ACITVITY                | 3.5e-03  |
| ADP_BINDING                                      | 4.0e-03  |
| HEAT_SHOCK_PROTEIN_BINDING                       | 4.1e-03  |
| PROTEIN_K63_LINKED_DEUBIQUITINATION              | 5.2e-03  |
