# Supplementary material for: A gene regulation model reveals an ancestral adaptation response to particulate exposure triggered by nanomaterials
Source: Research Square preprint supplement (doi:10.21203/rs.3.rs-1547187/v1), 2022-04-12
Supplement: Supplementary file 2 [file 880aa2c7c87eddda81bb8657.pdf]

**Table S11: Atomistic nanodescriptors with sample values for 10 nm TiO<sub>2</sub>.**

|                      | Descriptor name                                                      | TiO <sub>2</sub> |
|----------------------|----------------------------------------------------------------------|------------------|
|                      | Diameter (nm)                                                        | 10               |
| Chemical composition | Log of total No. of atoms in NP.                                     | 4,702146         |
|                      | Log of total No. of atoms in core region of NP.                      | 4,564702         |
|                      | Log of total No. of atoms in surface region of NP.                   | 4,135578         |
|                      | Log of total No. of Me atoms in NP.                                  | 4,225025         |
|                      | Log of total No. of Me atoms in core region of NP.                   | 4,088172         |
|                      | Log of total No. of Me atoms in surface region of NP.                | 3,656864         |
|                      | Log of total No. of O atoms in NP.                                   | 4,526055         |
|                      | Log of total No. of O atoms in surface region of NP.                 | 3,96028          |
| Potential Energy     | Avg. pot. energy of all atoms in NP in eV.                           | -40,1659         |
|                      | Avg. pot. energy of atoms in core region of NP in eV.                | -40,5054         |
|                      | Avg. pot. energy of atoms in surface region of NP in eV.             | -39,254          |
|                      | Relative avg. pot. energy of Me atoms in NP in eV.                   | -78,6862         |
|                      | Relative avg. pot. energy of Me atoms in core region of NP in eV.    | -79,3346         |
|                      | Relative avg. pot. energy of Me atoms in surface region of NP in eV. | -76,9356         |
|                      | Relative avg. pot. energy of O atoms in NP in eV.                    | -20,9057         |
|                      | Relative avg. pot. energy of O atoms in surface region of NP in eV.  | -41,0328         |
| Topology             | Avg. coordination No. of all atoms in NP.                            | 3,882383         |
|                      | Avg. coordination No. of atoms in core region of NP.                 | 4,001362         |
|                      | Avg. coordination No. of atoms in surface region of NP.              | 3,562793         |
|                      | Avg. coordination No. of Me atoms in NP.                             | 5,823575         |
|                      | Avg. coordination No. of Me atoms in core region of NP.              | 6                |
|                      | Avg. coordination No. of Me atoms in surface region of NP.           | 5,34729          |
|                      | Avg. coordination No. of O atoms in NP.                              | 2,911787         |
|                      | Avg. coordination No. of O atoms in surface region of NP in.         | 2,675433         |
| Size                 | Diameter of the NP in Å.                                             | 99,99438         |
|                      | Surface area of the NP in Å <sup>2</sup> .                           | 31412,37         |
|                      | Volume of the NP in Å <sup>3</sup> .                                 | 523510           |
| Lattice energy       | Lattice energy of NP in eV.                                          | -120,498         |
|                      | Relative lattice energy of NP to bulk material (eV)                  | -0,93972         |
|                      | Lattice energy of NP divided by the diameter of NP.                  | -1,20504         |
|                      | Lattice energy of NP per unit surface area.                          | -0,00384         |
|                      | Lattice energy of NP per unit volume.                                | -0,00023         |
| Force vector         | Avg. length of force vector for all atoms                            | 1,449142         |
|                      | Avg. length of force vector for all atoms in core region             | 0,488537         |
|                      | Avg. length of force vector for all atoms in surface region          | 4,029433         |
|                      | Avg. length of force vector for all Me atoms                         | 1,411663         |
|                      | Avg. length of force vector for Me atoms in core region              | 0,002976         |
|                      | Avg. length of force vector for Me atoms in surface region           | 5,214622         |

|                                                                                     |                                                                                       |          |
|-------------------------------------------------------------------------------------|---------------------------------------------------------------------------------------|----------|
| Fo<br>rce<br>ve<br>cto<br>r                                                         | Avg. length of force vector for all O atoms                                           | 1,467881 |
|                                                                                     | Avg. length of force vector for O atoms in core region                                | 33,74856 |
|                                                                                     | Avg. length of force vector for O atoms in surface region                             | 47,59623 |
|                                                                                     | Avg. length of force vector surface normal component for all atoms                    | -0,05728 |
|                                                                                     | Avg. length of force vector surface normal component for all atoms in core region     | -0,0008  |
|                                                                                     | Avg. length of force vector surface normal component for all atoms in surface region  | -0,209   |
|                                                                                     | Avg. length of force vector surface normal component for all Me atoms                 | -0,42259 |
|                                                                                     | Avg. length of force vector surface normal component for Me atoms in core region      | 0,000104 |
|                                                                                     | Avg. length of force vector surface normal component for Me atoms in surface region   | -1,56372 |
|                                                                                     | Avg. length of force vector surface normal component for all O atoms                  | 0,125376 |
|                                                                                     | Avg. length of force vector surface normal component for O atoms in core region       | 0,731813 |
|                                                                                     | Avg. length of force vector surface normal component for O atoms in surface region    | 3,440085 |
|                                                                                     | Avg. length of force vector surface tangent component for all atoms                   | 0,993472 |
|                                                                                     | Avg. length of force vector surface tangent component for all atoms in core region    | 0,382975 |
|                                                                                     | Avg. length of force vector surface tangent component for all atoms in surface region | 2,633335 |
|                                                                                     | Avg. length of force vector surface tangent component for all Me atoms                | 0,812424 |
|                                                                                     | Avg. length of force vector surface tangent component for Me atoms in core region     | 0,000887 |
|                                                                                     | Avg. length of force vector surface tangent component for Me atoms in surface region  | 3,003286 |
|                                                                                     | Avg. length of force vector surface tangent component for all O atoms                 | 1,083997 |
|                                                                                     | Avg. length of force vector surface tangent component for O atoms in core region      | -0,00125 |
| Avg. length of force vector surface tangent component for O atoms in surface region | 0,464644                                                                              |          |
