# Supplementary material for: A gene regulation model reveals an ancestral adaptation response to particulate exposure triggered by nanomaterials
Source: Research Square preprint supplement (doi:10.21203/rs.3.rs-1547187/v1), 2022-04-12
Supplement: Supplementary file 3 [file 9f55abcb673aa3277faa5e80.pdf]

Table S5: In vitro cluster long term post exposure gene list

ENSG00000149476  
ENSG00000133275  
ENSG00000077721  
ENSG00000116459  
ENSG00000100731  
ENSG00000198604  
ENSG00000171161  
ENSG00000089006  
ENSG00000064999  
ENSG00000156261  
ENSG00000128228  
ENSG00000156958  
ENSG00000198900  
ENSG00000152642  
ENSG00000136104  
ENSG00000112578  
ENSG00000116871  
ENSG00000160211  
ENSG00000127993  
ENSG00000120837  
ENSG00000204237  
ENSG00000170266  
ENSG00000093000  
ENSG00000111011  
ENSG00000132471  
ENSG00000144677  
ENSG00000143409  
ENSG00000165689  
ENSG00000123595  
ENSG00000089050  
ENSG00000135720  
ENSG00000049860  
ENSG00000101109  
ENSG00000169057  
ENSG00000115091  
ENSG00000138092  
ENSG00000129255  
ENSG00000023909  
ENSG00000121897  
ENSG00000106462  
ENSG00000102096  
ENSG00000104064  
ENSG00000110911  
ENSG00000163938

ENSG00000100714  
ENSG00000204856  
ENSG00000120860  
ENSG00000182923  
ENSG00000175416  
ENSG00000170522  
ENSG00000176619  
ENSG00000146072  
ENSG00000154642  
ENSG00000198246  
ENSG00000101255  
ENSG00000257923  
ENSG00000125952  
ENSG00000170791  
ENSG00000005810  
ENSG00000102103  
ENSG00000158050  
ENSG00000053501  
ENSG00000107140  
ENSG00000173588  
ENSG00000175662  
ENSG00000121691  
ENSG00000087074  
ENSG00000174238  
ENSG00000176095  
ENSG00000124151  
ENSG00000118007  
ENSG00000163636  
ENSG00000156345  
ENSG00000083642  
ENSG00000118507  
ENSG00000160058  
ENSG00000013441  
ENSG00000176102  
ENSG00000101220  
ENSG00000125827  
ENSG00000130338  
ENSG00000041880  
ENSG00000109323  
ENSG00000138399  
ENSG00000151693  
ENSG00000104980  
ENSG00000109534  
ENSG00000100664  
ENSG00000135108  
ENSG00000143384

ENSG00000170004  
ENSG00000067182  
ENSG00000160908  
ENSG00000135912  
ENSG00000109320  
ENSG00000176390  
ENSG00000181789  
ENSG00000176871  
ENSG00000170348  
ENSG00000103353  
ENSG00000136935  
ENSG00000169714  
ENSG00000107201  
ENSG00000112110  
ENSG00000160193  
ENSG00000100075  
ENSG00000100219  
ENSG00000165283  
ENSG00000117395  
ENSG00000015532  
ENSG00000111247  
ENSG00000198142  
ENSG00000159363  
ENSG00000111445  
ENSG00000051108  
ENSG00000130313  
ENSG00000106263  
ENSG00000158793  
ENSG00000177981  
ENSG00000103966  
ENSG00000100372  
ENSG00000162413  
ENSG00000145912  
ENSG00000133789  
ENSG00000087269  
ENSG00000136891  
ENSG00000002549  
ENSG00000089057  
ENSG00000168067  
ENSG00000184470  
ENSG00000148468  
ENSG00000100418  
ENSG00000153310  
ENSG00000244754  
ENSG00000142192  
ENSG00000125648

ENSG00000197563  
ENSG00000119522  
ENSG00000138796  
ENSG00000197771  
ENSG00000100353  
ENSG00000166260  
ENSG00000182287  
ENSG00000120437  
ENSG00000106443  
ENSG00000105993  
ENSG00000102908  
ENSG00000119314  
ENSG00000188529  
ENSG00000074356  
ENSG00000112576  
ENSG00000145287  
ENSG00000245848  
ENSG00000171634  
ENSG00000135535  
ENSG00000135049  
ENSG00000152601  
ENSG00000118855  
ENSG00000100263  
ENSG00000197081  
ENSG00000213995  
ENSG00000169217  
ENSG00000126001  
ENSG00000112972  
ENSG00000116133  
ENSG00000038382  
ENSG00000106351  
ENSG00000064102  
ENSG00000145022  
ENSG00000130713  
ENSG00000131470  
ENSG00000080546  
ENSG00000085224  
ENSG00000138468  
ENSG00000138760  
ENSG00000080823  
ENSG00000070770  
ENSG00000119640  
ENSG00000137575  
ENSG00000112419  
ENSG00000171617  
ENSG00000145901

ENSG00000158161  
ENSG00000139163  
ENSG00000185551  
ENSG00000166821  
ENSG00000070444  
ENSG00000166340  
ENSG00000154743  
ENSG00000163110  
ENSG00000064961  
ENSG00000085999  
ENSG00000050344  
ENSG00000021776  
ENSG00000056097  
ENSG00000005189  
ENSG00000008256  
ENSG00000100139  
ENSG00000106080  
ENSG00000121957  
ENSG00000085365  
ENSG00000127948  
ENSG00000013375  
ENSG00000076685  
ENSG00000109861  
ENSG00000064607  
ENSG00000155096  
ENSG00000182606  
ENSG00000183520  
ENSG00000205726  
ENSG00000100380  
ENSG00000149179  
ENSG00000178537  
ENSG00000102893  
ENSG00000035862  
ENSG00000169504  
ENSG00000138081  
ENSG00000118503  
ENSG00000103197  
ENSG00000134900  
ENSG00000092978  
ENSG00000177000  
ENSG00000136536  
ENSG00000100612  
ENSG00000134001  
ENSG00000134186  
ENSG00000106268  
ENSG00000000460

ENSG00000133872  
ENSG00000079805  
ENSG00000174780  
ENSG00000180879  
ENSG00000103657  
ENSG00000130779  
ENSG00000158711  
ENSG00000142657  
ENSG00000114738  
ENSG00000196154  
ENSG00000101150  
ENSG00000101337  
ENSG00000106245  
ENSG00000144034  
ENSG00000136021  
ENSG00000108312  
ENSG00000004864  
ENSG00000183726  
ENSG00000174442  
ENSG00000158195  
ENSG00000096433  
ENSG00000124783  
ENSG00000152556  
ENSG00000102100  
ENSG00000133961  
ENSG00000187840  
ENSG00000165119  
ENSG00000162032  
ENSG00000148481  
ENSG00000089685  
ENSG00000100330  
ENSG00000115756  
ENSG00000064687  
ENSG00000067369  
ENSG00000151690  
ENSG00000138604  
ENSG00000175183  
ENSG00000112249  
ENSG00000176834  
ENSG00000035403  
ENSG00000198554  
ENSG00000140105  
ENSG00000127191  
ENSG00000172183  
ENSG00000163875
