# Supplementary material for: A gene regulation model reveals an ancestral adaptation response to particulate exposure triggered by nanomaterials
Source: Research Square preprint supplement (doi:10.21203/rs.3.rs-1547187/v1), 2022-04-12
Supplement: Supplementary file 4 [file ac37fdb793936c58070e7a6d.pdf]

Table S6: Motif analysis results for in vivo and in vitro clusters

| <b>in_vivo_complete_biomarkers</b> | <b>Factorbook</b>      | <b>in_vitro_complete_biomarkers</b> | <b>Factorbook</b>      |
|------------------------------------|------------------------|-------------------------------------|------------------------|
| TWTTTTTTTTWTTTTT                   | <a href="#">ZNF362</a> | WTTTTTWTTTTTWWW                     | <a href="#">ZNF362</a> |
| GGSSGGGGCGGGGS                     | <a href="#">KLF10</a>  | CSCSSCSCCGCCCC                      | <a href="#">FOS</a>    |
| CGCCTGTAATCCCAG                    | <a href="#">ZNF460</a> | GCTGGGATTACAGGC                     | <a href="#">ZNF460</a> |
| CCAGCCTGGSCAACA                    | <a href="#">ZNF770</a> | RCCTCRGCCTCCCR                      | <a href="#">ZNF770</a> |
| CCHRCCTCMGCCTCC                    | <a href="#">ZNF770</a> | YTCYTYYYYYTTCCYC                    | <a href="#">ZNF263</a> |
| GCCACCRYGCCCRGC                    | <a href="#">ZNF460</a> | TGAGCCACRCRCCC                      | <a href="#">CHD4</a>   |
| YYYYYYYYYTCC                       | <a href="#">NFXL1</a>  | ACTWCARCTYCCRG                      | <a href="#">ZNF143</a> |
| CTCRAACTCCTGACC                    | <a href="#">KDM1A</a>  | TGTRSCCAGGCTGG                      | <a href="#">ZNF770</a> |
| TAGAGACGGGGTTTC                    | <a href="#">BCL11A</a> |                                     |                        |
| AGAATCRCTTGAACC                    | <a href="#">ZNF362</a> |                                     |                        |
