# Supplementary material for: A gene regulation model reveals an ancestral adaptation response to particulate exposure triggered by nanomaterials
Source: Research Square preprint supplement (doi:10.21203/rs.3.rs-1547187/v1), 2022-04-12
Supplement: Supplementary file 5 [file d59d5c424e0941c8d4d50c31.pdf]

Table S1: Meta Analysis Gene Rank

ENSG00000099622  
ENSG00000150347  
ENSG00000159216  
ENSG00000120694  
ENSG00000134107  
ENSG00000067082  
ENSG00000148926  
ENSG00000115306  
ENSG00000115738  
ENSG00000112715  
ENSG00000116741  
ENSG00000170525  
ENSG00000163110  
ENSG00000162772  
ENSG00000054523  
ENSG00000127603  
ENSG00000003402  
ENSG00000196372  
ENSG00000118503  
ENSG00000122952  
ENSG00000109861  
ENSG00000147852  
ENSG00000197063  
ENSG00000140416  
ENSG00000109971  
ENSG00000198363  
ENSG00000124588  
ENSG00000095383  
ENSG00000165030  
ENSG00000124831  
ENSG00000171793  
ENSG00000196923  
ENSG00000120738  
ENSG00000188529  
ENSG00000101191  
ENSG00000157557  
ENSG00000112972  
ENSG00000117616  
ENSG00000125968  
ENSG00000023445  
ENSG00000196781  
ENSG00000125844  
ENSG00000182287  
ENSG00000173559

ENSG00000072274  
ENSG00000129292  
ENSG00000221978  
ENSG00000147872  
ENSG00000166012  
ENSG00000174306  
ENSG00000114770  
ENSG00000177606  
ENSG00000116560  
ENSG00000185022  
ENSG00000013441  
ENSG00000102178  
ENSG00000115758  
ENSG00000119397  
ENSG00000141447  
ENSG00000110911  
ENSG00000086061  
ENSG00000141644  
ENSG00000065150  
ENSG00000004455  
ENSG00000152795  
ENSG00000006652  
ENSG00000106077  
ENSG00000120129  
ENSG00000134690  
ENSG00000148090  
ENSG00000133943  
ENSG00000114857  
ENSG00000198431  
ENSG00000166900  
ENSG00000120833  
ENSG00000133794  
ENSG00000005810  
ENSG00000088448  
ENSG00000124523  
ENSG00000136824  
ENSG00000139112  
ENSG00000135069  
ENSG00000165475  
ENSG00000121579  
ENSG00000079332  
ENSG00000159140  
ENSG00000127824  
ENSG00000180817  
ENSG00000213626  
ENSG00000149809

ENSG00000185650  
ENSG00000023287  
ENSG00000010292  
ENSG00000101109  
ENSG00000169919  
ENSG00000011422  
ENSG00000105993  
ENSG00000107201  
ENSG00000103353  
ENSG00000105516  
ENSG00000147548  
ENSG00000213347  
ENSG00000131979  
ENSG00000134324  
ENSG00000169504  
ENSG00000116604  
ENSG00000116260  
ENSG00000143622  
ENSG00000113161  
ENSG00000100380  
ENSG00000115641  
ENSG00000159259  
ENSG00000070214  
ENSG00000101187  
ENSG00000099860  
ENSG00000134313  
ENSG00000135930  
ENSG00000171467  
ENSG00000087074  
ENSG00000147421  
ENSG00000167522  
ENSG00000198625  
ENSG00000176974  
ENSG00000101255  
ENSG00000175197  
ENSG00000077684  
ENSG00000133789  
ENSG00000165795  
ENSG00000148459  
ENSG00000111371  
ENSG00000205726  
ENSG00000101745  
ENSG00000164830  
ENSG00000146143  
ENSG00000166508  
ENSG00000176463

ENSG00000244754  
ENSG00000086300  
ENSG00000134294  
ENSG00000157954  
ENSG00000124181  
ENSG00000206053  
ENSG00000101290  
ENSG00000116679  
ENSG00000047849  
ENSG00000071539  
ENSG00000137575  
ENSG00000123933  
ENSG00000160310  
ENSG00000120686  
ENSG00000106344  
ENSG00000166387  
ENSG00000135316  
ENSG00000156787  
ENSG00000153250  
ENSG00000131153  
ENSG00000174197  
ENSG00000132002  
ENSG00000068028  
ENSG00000136811  
ENSG00000101019  
ENSG00000125818  
ENSG00000127481  
ENSG00000171552  
ENSG00000164733  
ENSG00000070495  
ENSG00000064393  
ENSG00000100201  
ENSG00000111276  
ENSG00000163660  
ENSG00000157106  
ENSG00000068078  
ENSG00000050344  
ENSG00000095787  
ENSG00000168003  
ENSG00000167074  
ENSG00000114439  
ENSG00000163956  
ENSG00000120438  
ENSG00000188130  
ENSG00000119326  
ENSG00000023330

ENSG00000197381  
ENSG00000134884  
ENSG00000141458  
ENSG00000147162  
ENSG00000100614  
ENSG00000145287  
ENSG00000146232  
ENSG00000144136  
ENSG00000008294  
ENSG00000124225  
ENSG00000117139  
ENSG00000128228  
ENSG00000116754  
ENSG00000106829  
ENSG00000129351  
ENSG00000142192  
ENSG00000102265  
ENSG00000176890  
ENSG00000040341  
ENSG00000184216  
ENSG00000073008  
ENSG00000017260  
ENSG00000091527  
ENSG00000011454  
ENSG00000159788  
ENSG00000116584  
ENSG00000124120  
ENSG00000160213  
ENSG00000129657  
ENSG00000197555  
ENSG00000112739  
ENSG00000132950  
ENSG00000214063  
ENSG00000168209  
ENSG00000169905  
ENSG00000100526  
ENSG00000025770  
ENSG00000170791  
ENSG00000134109  
ENSG00000010295  
ENSG00000197563  
ENSG00000187239  
ENSG00000104064  
ENSG000000086102  
ENSG00000124783  
ENSG00000143179

ENSG00000112118  
ENSG00000110066  
ENSG00000154743  
ENSG00000100034  
ENSG00000103550  
ENSG00000198301  
ENSG00000101236  
ENSG00000110321  
ENSG00000161800  
ENSG00000177595  
ENSG00000168066  
ENSG00000166233  
ENSG00000142949  
ENSG00000197321  
ENSG00000106804  
ENSG00000142227  
ENSG00000171223  
ENSG00000137834  
ENSG00000094916  
ENSG00000060237  
ENSG00000145050  
ENSG00000004478  
ENSG00000154642  
ENSG00000175591  
ENSG00000105939  
ENSG00000171453  
ENSG00000164828  
ENSG00000197771  
ENSG00000115520  
ENSG00000140718  
ENSG00000099204  
ENSG00000117308  
ENSG00000169155  
ENSG00000169641  
ENSG00000170606  
ENSG00000080839  
ENSG00000136261  
ENSG00000085117  
ENSG00000170312  
ENSG00000164070  
ENSG00000160299  
ENSG00000107937  
ENSG00000070010  
ENSG00000125354  
ENSG00000131470  
ENSG00000101040

ENSG00000118482  
ENSG00000072310  
ENSG00000169249  
ENSG00000115053  
ENSG00000086758  
ENSG00000100417  
ENSG00000163848  
ENSG00000170776  
ENSG00000145675  
ENSG00000100354  
ENSG00000008513  
ENSG00000132326  
ENSG00000123146  
ENSG00000183337  
ENSG00000165304  
ENSG00000145779  
ENSG00000137955  
ENSG00000016864  
ENSG00000134222  
ENSG00000100307  
ENSG00000167325  
ENSG00000155090  
ENSG00000110713  
ENSG00000001461  
ENSG00000148450  
ENSG00000106460  
ENSG00000118960  
ENSG00000111445  
ENSG00000152520  
ENSG00000117399  
ENSG00000102531  
ENSG00000182670  
ENSG00000059728  
ENSG00000139218  
ENSG00000138778  
ENSG00000102908  
ENSG00000104687  
ENSG00000143549  
ENSG00000003756  
ENSG00000013810  
ENSG00000038382  
ENSG00000029363  
ENSG00000104218  
ENSG00000123485  
ENSG00000158467  
ENSG00000130164

ENSG00000159399  
ENSG00000145687  
ENSG00000176102  
ENSG00000130826  
ENSG00000132780  
ENSG00000136997  
ENSG00000122566  
ENSG00000101265  
ENSG00000111679  
ENSG00000034152  
ENSG00000211584  
ENSG00000123131  
ENSG00000113615  
ENSG00000156313  
ENSG00000164985  
ENSG00000103351  
ENSG00000011198  
ENSG00000155111  
ENSG00000077721  
ENSG00000064601  
ENSG00000143970  
ENSG00000068745  
ENSG00000111602  
ENSG00000132680  
ENSG00000013364  
ENSG00000118515  
ENSG00000143013  
ENSG00000020256  
ENSG00000072210  
ENSG00000166851  
ENSG00000120802  
ENSG00000140105  
ENSG00000088325  
ENSG00000102804  
ENSG00000089248  
ENSG00000145901  
ENSG00000120899  
ENSG00000131446  
ENSG00000162734  
ENSG00000113368  
ENSG00000174371  
ENSG00000174718  
ENSG00000134574  
ENSG00000101972  
ENSG00000130559  
ENSG00000085832

ENSG00000168078  
ENSG00000010322  
ENSG00000127948  
ENSG00000092964  
ENSG00000196405  
ENSG00000072110  
ENSG00000086062  
ENSG00000147130  
ENSG00000117450  
ENSG00000100345  
ENSG00000198176  
ENSG00000173638  
ENSG00000048991  
ENSG00000076003  
ENSG00000087586  
ENSG00000010244  
ENSG00000121691  
ENSG00000160953  
ENSG00000112419  
ENSG00000152457  
ENSG00000187741  
ENSG00000042317  
ENSG00000102606  
ENSG00000185222  
ENSG00000112578  
ENSG00000164104  
ENSG00000108829  
ENSG00000129003  
ENSG00000131051  
ENSG00000100647  
ENSG00000158050  
ENSG00000134138  
ENSG00000090006  
ENSG00000133119  
ENSG00000114107  
ENSG00000125347  
ENSG00000171700  
ENSG00000106080  
ENSG00000070444  
ENSG00000112773  
ENSG00000108654  
ENSG00000158828  
ENSG00000138758  
ENSG00000167900  
ENSG00000134480  
ENSG00000178585

ENSG00000153187  
ENSG00000120158  
ENSG00000096060  
ENSG00000142733  
ENSG00000136982  
ENSG00000139163  
ENSG00000135924  
ENSG00000115762  
ENSG00000139514  
ENSG00000139734  
ENSG00000105835  
ENSG00000056586  
ENSG00000197694  
ENSG00000100731  
ENSG00000053254  
ENSG00000078699  
ENSG00000105173  
ENSG00000134905  
ENSG00000172183  
ENSG00000116984  
ENSG00000096746  
ENSG00000024862  
ENSG00000136933  
ENSG00000112312  
ENSG00000121057  
ENSG00000071243  
ENSG00000100099  
ENSG00000163659  
ENSG00000142634  
ENSG00000121892  
ENSG00000118200  
ENSG00000100418  
ENSG00000110315  
ENSG00000107771  
ENSG00000107438  
ENSG00000163820  
ENSG00000136867  
ENSG00000147454  
ENSG00000110721  
ENSG00000164032  
ENSG00000120690  
ENSG00000104419  
ENSG00000117724  
ENSG00000108848  
ENSG00000163931  
ENSG00000107077

ENSG00000100401  
ENSG00000171791  
ENSG00000119801  
ENSG00000177189  
ENSG00000133703  
ENSG00000143190  
ENSG00000101224  
ENSG00000015475  
ENSG00000104427  
ENSG00000183255  
ENSG00000159479  
ENSG00000051523  
ENSG00000155096  
ENSG00000159176  
ENSG00000182606  
ENSG00000117394  
ENSG00000100219  
ENSG00000177200  
ENSG00000106268  
ENSG00000179115  
ENSG00000078304  
ENSG00000143409  
ENSG00000140455  
ENSG00000005893  
ENSG00000077157  
ENSG00000112679  
ENSG00000184470  
ENSG00000123992  
ENSG00000124207  
ENSG00000166801  
ENSG00000139684  
ENSG00000129255  
ENSG00000167978  
ENSG00000136243  
ENSG00000136104  
ENSG00000106462  
ENSG00000197971  
ENSG00000167186  
ENSG00000104549  
ENSG00000141524  
ENSG00000080823  
ENSG00000131669  
ENSG00000172216  
ENSG00000089685  
ENSG00000033800  
ENSG00000128928

ENSG00000150764  
ENSG00000141027  
ENSG00000134852  
ENSG00000198722  
ENSG00000101940  
ENSG00000110841  
ENSG00000185551  
ENSG00000143162  
ENSG00000149577  
ENSG00000256525  
ENSG00000111206  
ENSG00000086475  
ENSG00000198900  
ENSG00000152348  
ENSG00000083312  
ENSG00000196323  
ENSG00000089050  
ENSG00000080822  
ENSG00000151500  
ENSG00000125648  
ENSG00000135720  
ENSG00000135124  
ENSG00000170854  
ENSG00000128567  
ENSG00000088986  
ENSG00000119655  
ENSG00000115687  
ENSG00000109046  
ENSG00000144677  
ENSG00000162783  
ENSG00000128294  
ENSG00000159388  
ENSG00000115233  
ENSG00000179958  
ENSG00000116161  
ENSG00000156675  
ENSG00000196305  
ENSG00000058804  
ENSG00000167258  
ENSG00000163516  
ENSG00000152465  
ENSG00000148154  
ENSG00000071127  
ENSG00000198171  
ENSG00000103966  
ENSG00000047056

ENSG00000166471  
ENSG00000151693  
ENSG00000172766  
ENSG00000113569  
ENSG00000112983  
ENSG00000142197  
ENSG00000151694  
ENSG00000115946  
ENSG00000149930  
ENSG00000163050  
ENSG00000197969  
ENSG00000163939  
ENSG00000137547  
ENSG00000151287  
ENSG00000175354  
ENSG00000141646  
ENSG00000166579  
ENSG00000165732  
ENSG00000113916  
ENSG00000165819  
ENSG00000161981  
ENSG00000107521  
ENSG00000134108  
ENSG00000106723  
ENSG00000087269  
ENSG00000083544  
ENSG00000133606  
ENSG00000089280  
ENSG00000076864  
ENSG00000172456  
ENSG00000111666  
ENSG00000138613  
ENSG00000157540  
ENSG00000092108  
ENSG00000118564  
ENSG00000100297  
ENSG00000113648  
ENSG00000104691  
ENSG00000107902  
ENSG00000107758  
ENSG00000100162  
ENSG00000137478  
ENSG00000166974  
ENSG00000139746  
ENSG00000197451  
ENSG00000101310

ENSG00000186716  
ENSG00000166986  
ENSG00000006744  
ENSG00000185963  
ENSG00000159147  
ENSG00000143819  
ENSG00000169136  
ENSG00000160255  
ENSG00000163788  
ENSG00000158042  
ENSG00000100097  
ENSG00000125676  
ENSG00000083223  
ENSG00000114738  
ENSG00000184445  
ENSG00000132600  
ENSG00000135365  
ENSG00000051108  
ENSG00000168610  
ENSG00000185420  
ENSG00000165219  
ENSG00000149084  
ENSG00000093000  
ENSG00000143870  
ENSG00000126001  
ENSG00000110921  
ENSG00000154767  
ENSG00000115204  
ENSG00000110200  
ENSG00000150907  
ENSG00000137267  
ENSG00000106305  
ENSG00000138095  
ENSG00000102103  
ENSG00000121390  
ENSG00000204628  
ENSG00000105011  
ENSG00000108389  
ENSG00000196083  
ENSG00000044574  
ENSG00000090889  
ENSG00000091436  
ENSG00000083799  
ENSG00000053501  
ENSG00000110218  
ENSG00000163947

ENSG00000149929  
ENSG00000075702  
ENSG00000131462  
ENSG00000055332  
ENSG00000172831  
ENSG00000179163  
ENSG00000122435  
ENSG00000135040  
ENSG00000118096  
ENSG00000117625  
ENSG00000133858  
ENSG00000176170  
ENSG00000113163  
ENSG00000132964  
ENSG00000138468  
ENSG00000065802  
ENSG00000151690  
ENSG00000198911  
ENSG00000104907  
ENSG00000078674  
ENSG00000099785  
ENSG00000008083  
ENSG00000143442  
ENSG00000023909  
ENSG00000174780  
ENSG00000156110  
ENSG00000105968  
ENSG00000115977  
ENSG00000118260  
ENSG00000157350  
ENSG00000159200  
ENSG00000117682  
ENSG00000106263  
ENSG00000118961  
ENSG00000196449  
ENSG00000138092  
ENSG00000111647  
ENSG00000148481  
ENSG00000109320  
ENSG00000106683  
ENSG00000173221  
ENSG00000175662  
ENSG00000137880  
ENSG00000138834  
ENSG00000030582  
ENSG00000147471

ENSG00000135655  
ENSG00000114480  
ENSG00000035862  
ENSG00000135049  
ENSG00000198833  
ENSG00000106605  
ENSG00000105926  
ENSG00000112200  
ENSG00000164442  
ENSG00000198604  
ENSG00000090674  
ENSG00000164548  
ENSG00000155304  
ENSG00000100823  
ENSG00000197622  
ENSG00000138760  
ENSG00000132824  
ENSG00000120699  
ENSG00000164292  
ENSG00000007255  
ENSG00000117305  
ENSG00000166681  
ENSG00000162585  
ENSG00000204178  
ENSG00000108175  
ENSG00000013375  
ENSG00000179218  
ENSG00000163468  
ENSG00000134243  
ENSG00000185917  
ENSG00000143569  
ENSG00000021776  
ENSG00000085365  
ENSG00000169925  
ENSG00000163950  
ENSG00000108641  
ENSG00000116497  
ENSG00000101079  
ENSG00000078403  
ENSG00000143384  
ENSG00000137106  
ENSG00000110888  
ENSG00000167695  
ENSG00000134744  
ENSG00000099968  
ENSG00000138442

ENSG00000147065  
ENSG00000083123  
ENSG00000151726  
ENSG00000090686  
ENSG00000160746  
ENSG00000159363  
ENSG00000060971  
ENSG00000014641  
ENSG00000135052  
ENSG00000168397  
ENSG00000002549  
ENSG00000130309  
ENSG00000115042  
ENSG00000204120  
ENSG00000181704  
ENSG00000117155  
ENSG00000130313  
ENSG00000062716  
ENSG00000100353  
ENSG00000186350  
ENSG00000102710  
ENSG00000010818  
ENSG00000171492  
ENSG00000146247  
ENSG00000151929  
ENSG00000167081  
ENSG00000086712  
ENSG00000118705  
ENSG00000052802  
ENSG00000187742  
ENSG00000119707  
ENSG00000075131  
ENSG00000117533  
ENSG00000257923  
ENSG00000214706  
ENSG00000132424  
ENSG00000075151  
ENSG00000119537  
ENSG00000187266  
ENSG00000139436  
ENSG00000122884  
ENSG00000089154  
ENSG00000095380  
ENSG00000138668  
ENSG00000025293  
ENSG00000134318

ENSG00000007392  
ENSG00000166340  
ENSG00000089006  
ENSG00000177084  
ENSG00000100575  
ENSG00000111554  
ENSG00000125977  
ENSG00000138764  
ENSG00000213995  
ENSG00000165195  
ENSG00000114416  
ENSG00000198799  
ENSG00000116717  
ENSG00000152642  
ENSG00000137776  
ENSG00000168067  
ENSG00000127564  
ENSG00000196367  
ENSG00000186184  
ENSG00000085511  
ENSG00000213281  
ENSG00000138279  
ENSG00000172731  
ENSG00000004779  
ENSG00000008256  
ENSG00000035403  
ENSG00000100271  
ENSG00000204138  
ENSG00000155463  
ENSG00000168036  
ENSG00000083720  
ENSG00000171617  
ENSG00000136738  
ENSG00000080546  
ENSG00000135164  
ENSG00000068383  
ENSG00000126858  
ENSG00000164109  
ENSG00000106351  
ENSG00000133275  
ENSG00000120063  
ENSG00000197299  
ENSG00000058272  
ENSG00000116830  
ENSG00000165119  
ENSG00000135446

ENSG00000131791  
ENSG00000171163  
ENSG00000104731  
ENSG00000136536  
ENSG00000106443  
ENSG00000100030  
ENSG00000105373  
ENSG00000149179  
ENSG00000147140  
ENSG00000150782  
ENSG00000152601  
ENSG00000100142  
ENSG00000136636  
ENSG00000167775  
ENSG00000117000  
ENSG00000166197  
ENSG00000044446  
ENSG00000127191  
ENSG00000137274  
ENSG00000105447  
ENSG00000140262  
ENSG00000114026  
ENSG00000147526  
ENSG00000052841  
ENSG00000146457  
ENSG00000137497  
ENSG00000132773  
ENSG00000153113  
ENSG00000116977  
ENSG00000133026  
ENSG00000169738  
ENSG00000083535  
ENSG00000087008  
ENSG00000148634  
ENSG00000085999  
ENSG00000173674  
ENSG00000004864  
ENSG00000117500  
ENSG00000114126  
ENSG00000072849  
ENSG00000076248  
ENSG00000172725  
ENSG00000104738  
ENSG00000065883  
ENSG00000042493  
ENSG00000101654

ENSG00000172893  
ENSG00000000460  
ENSG00000002834  
ENSG00000131238  
ENSG00000163938  
ENSG00000113269  
ENSG00000033627  
ENSG00000007541  
ENSG00000146072  
ENSG00000158169  
ENSG00000198792  
ENSG00000101868  
ENSG00000119402  
ENSG00000126215  
ENSG00000163932  
ENSG00000149591  
ENSG00000127804  
ENSG00000100422  
ENSG00000104356  
ENSG00000130311  
ENSG00000112210  
ENSG00000128059  
ENSG00000163875  
ENSG00000135932  
ENSG00000171148  
ENSG00000100330  
ENSG00000119487  
ENSG00000162032  
ENSG00000105223  
ENSG00000100813  
ENSG00000167508  
ENSG00000118855  
ENSG00000137522  
ENSG00000141034  
ENSG00000197170  
ENSG00000085224  
ENSG00000148834  
ENSG00000176095  
ENSG00000184164  
ENSG00000172059  
ENSG00000142875  
ENSG00000119986  
ENSG00000174437  
ENSG00000157869  
ENSG00000168710  
ENSG00000175198

ENSG00000153827  
ENSG00000150995  
ENSG00000103657  
ENSG00000110047  
ENSG00000089057  
ENSG00000160050  
ENSG00000102763  
ENSG00000138182  
ENSG00000118507  
ENSG00000160957  
ENSG00000131504  
ENSG00000169857  
ENSG00000167280  
ENSG00000144711  
ENSG00000087460  
ENSG00000134686  
ENSG00000169710  
ENSG00000136813  
ENSG00000133961  
ENSG00000168495  
ENSG00000121644  
ENSG00000170581  
ENSG00000175215  
ENSG00000065243  
ENSG00000035681  
ENSG00000128590  
ENSG00000073111  
ENSG00000179833  
ENSG00000184117  
ENSG00000160193  
ENSG00000087884  
ENSG00000177000  
ENSG00000083642  
ENSG00000093167  
ENSG00000137074  
ENSG00000158161  
ENSG00000100266  
ENSG00000131100  
ENSG00000171634  
ENSG00000198793  
ENSG00000137269  
ENSG00000162377  
ENSG00000077549  
ENSG00000066322  
ENSG00000066027  
ENSG00000168216

ENSG00000116761  
ENSG00000023902  
ENSG00000141551  
ENSG00000101935  
ENSG00000203485  
ENSG00000023516  
ENSG00000171988  
ENSG00000168701  
ENSG00000078369  
ENSG00000182923  
ENSG00000116133  
ENSG00000121671  
ENSG00000011021  
ENSG00000127483  
ENSG00000179295  
ENSG00000137509  
ENSG00000138756  
ENSG00000142102  
ENSG00000184014  
ENSG00000140612  
ENSG00000133030  
ENSG00000171490  
ENSG00000122550  
ENSG00000118816  
ENSG00000154582  
ENSG00000144283  
ENSG00000095066  
ENSG00000092094  
ENSG00000197785  
ENSG00000197548  
ENSG00000038274  
ENSG00000163512  
ENSG00000078070  
ENSG00000071189  
ENSG00000146918  
ENSG00000130520  
ENSG00000108557  
ENSG00000114268  
ENSG00000111727  
ENSG00000138111  
ENSG00000112039  
ENSG00000153879  
ENSG00000129355  
ENSG00000187837  
ENSG00000161526  
ENSG00000164172

ENSG00000064999  
ENSG00000032219  
ENSG00000064961  
ENSG00000213190  
ENSG00000160058  
ENSG00000205339  
ENSG00000165689  
ENSG00000099219  
ENSG00000139697  
ENSG00000090861  
ENSG00000160679  
ENSG00000136891  
ENSG00000112576  
ENSG00000170802  
ENSG00000167699  
ENSG00000152291  
ENSG00000139842  
ENSG00000142657  
ENSG00000078061  
ENSG00000003056  
ENSG00000110429  
ENSG00000102100  
ENSG00000172466  
ENSG00000072134  
ENSG00000184677  
ENSG00000107798  
ENSG00000107929  
ENSG00000049860  
ENSG00000127511  
ENSG00000196154  
ENSG00000082996  
ENSG00000149257  
ENSG00000198554  
ENSG00000182473  
ENSG00000150403  
ENSG00000221829  
ENSG00000130303  
ENSG00000114423  
ENSG00000153561  
ENSG00000160211  
ENSG00000198246  
ENSG00000136270  
ENSG00000105186  
ENSG00000169398  
ENSG00000178209  
ENSG00000096384

ENSG00000104998  
ENSG00000064607  
ENSG00000105287  
ENSG00000099341  
ENSG00000054793  
ENSG00000115267  
ENSG00000166260  
ENSG00000150459  
ENSG00000157259  
ENSG00000047249  
ENSG00000136758  
ENSG00000121897  
ENSG00000173621  
ENSG00000099875  
ENSG00000110514  
ENSG00000092847  
ENSG00000104763  
ENSG00000115839  
ENSG00000120437  
ENSG00000215301  
ENSG00000148175  
ENSG00000120265  
ENSG00000215021  
ENSG00000185608  
ENSG00000174373  
ENSG00000144034  
ENSG00000118292  
ENSG00000103148  
ENSG00000088992  
ENSG00000078902  
ENSG00000204856  
ENSG00000115840  
ENSG00000101337  
ENSG00000147119  
ENSG00000142687  
ENSG00000159348  
ENSG00000084774  
ENSG00000061987  
ENSG00000100376  
ENSG00000197818  
ENSG00000168781  
ENSG00000148484  
ENSG00000136021  
ENSG00000107951  
ENSG00000125686  
ENSG00000119414

ENSG00000127423  
ENSG00000132507  
ENSG00000103274  
ENSG00000073921  
ENSG00000144560  
ENSG00000156639  
ENSG00000101558  
ENSG00000100364  
ENSG00000104341  
ENSG00000100591  
ENSG00000163754  
ENSG00000113407  
ENSG00000101901  
ENSG00000108179  
ENSG00000163513  
ENSG00000181026  
ENSG00000167136  
ENSG00000130703  
ENSG00000151923  
ENSG00000197111  
ENSG00000056097  
ENSG00000166881  
ENSG00000162613  
ENSG00000171161  
ENSG00000166289  
ENSG00000119729  
ENSG00000167680  
ENSG00000204842  
ENSG00000180198  
ENSG00000011275  
ENSG00000130338  
ENSG00000004700  
ENSG00000102996  
ENSG00000157693  
ENSG00000138074  
ENSG00000152234  
ENSG00000197965  
ENSG00000132664  
ENSG00000145912  
ENSG00000134809  
ENSG00000188486  
ENSG00000034677  
ENSG00000128311  
ENSG00000143153  
ENSG00000159692  
ENSG00000116514

ENSG00000180340  
ENSG00000050748  
ENSG00000137486  
ENSG00000114098  
ENSG00000101639  
ENSG00000120685  
ENSG00000146834  
ENSG00000125629  
ENSG00000100139  
ENSG00000196141  
ENSG00000166971  
ENSG00000197586  
ENSG00000115966  
ENSG00000112699  
ENSG00000149476  
ENSG00000012660  
ENSG00000085788  
ENSG00000145982  
ENSG00000111906  
ENSG00000075239  
ENSG00000068001  
ENSG00000181019  
ENSG00000136840  
ENSG00000064419  
ENSG00000143376  
ENSG00000118518  
ENSG00000174238  
ENSG00000075618  
ENSG00000182718  
ENSG00000189091  
ENSG00000100888  
ENSG00000082781  
ENSG00000158711  
ENSG00000103994  
ENSG00000153310  
ENSG00000122299  
ENSG00000245848  
ENSG00000113328  
ENSG00000017797  
ENSG00000005194  
ENSG00000138796  
ENSG00000100372  
ENSG00000125826  
ENSG00000153487  
ENSG00000142684  
ENSG00000111684

ENSG00000165699  
ENSG00000119285  
ENSG00000067369  
ENSG00000080802  
ENSG00000179041  
ENSG00000164163  
ENSG00000185515  
ENSG00000159082  
ENSG00000162688  
ENSG00000079805  
ENSG00000100304  
ENSG00000111877  
ENSG00000100335  
ENSG00000087470  
ENSG00000167491  
ENSG00000134900  
ENSG00000123136  
ENSG00000163636  
ENSG00000170471  
ENSG00000072121  
ENSG00000214655  
ENSG00000117395  
ENSG00000121064  
ENSG00000131652  
ENSG00000064687  
ENSG00000154473  
ENSG00000124782  
ENSG00000119318  
ENSG00000015676  
ENSG00000136518  
ENSG00000100865  
ENSG00000103540  
ENSG00000116198  
ENSG00000159055  
ENSG00000043143  
ENSG00000119314  
ENSG00000112079  
ENSG00000100243  
ENSG00000096092  
ENSG00000125843  
ENSG00000168438  
ENSG00000070404  
ENSG00000143493  
ENSG00000076685  
ENSG00000147383  
ENSG00000170004

ENSG00000123545  
ENSG00000144867  
ENSG00000111850  
ENSG00000082898  
ENSG00000108651  
ENSG00000059573  
ENSG00000168765  
ENSG00000157637  
ENSG00000162413  
ENSG00000011295  
ENSG00000173588  
ENSG00000111859  
ENSG00000106348  
ENSG00000132155  
ENSG00000169057  
ENSG00000160049  
ENSG00000214517  
ENSG00000102931  
ENSG00000007923  
ENSG00000184281  
ENSG00000168575  
ENSG00000141526  
ENSG00000146842  
ENSG00000131626  
ENSG00000120860  
ENSG00000142168  
ENSG00000166224  
ENSG00000103275  
ENSG00000116205  
ENSG00000138604  
ENSG00000091651  
ENSG00000138069  
ENSG00000103043  
ENSG00000117592  
ENSG00000178537  
ENSG00000070367  
ENSG00000197375  
ENSG00000080845  
ENSG00000109220  
ENSG00000123908  
ENSG00000047410  
ENSG00000198836  
ENSG00000077232  
ENSG00000100147  
ENSG00000125863  
ENSG00000177565

ENSG00000129667  
ENSG00000125319  
ENSG00000198087  
ENSG00000112237  
ENSG00000102316  
ENSG00000004534  
ENSG00000166598  
ENSG00000059378  
ENSG00000184787  
ENSG00000103671  
ENSG00000088888  
ENSG00000116005  
ENSG00000005189  
ENSG00000028839  
ENSG00000153922  
ENSG00000163125  
ENSG00000115464  
ENSG00000128585  
ENSG00000100441  
ENSG00000132361  
ENSG00000101856  
ENSG00000066933  
ENSG00000101439  
ENSG00000102096  
ENSG00000184602  
ENSG00000178966  
ENSG00000143158  
ENSG00000029725  
ENSG00000100083  
ENSG00000117385  
ENSG00000132768  
ENSG00000123595  
ENSG00000054267  
ENSG00000116871  
ENSG00000071564  
ENSG00000113391  
ENSG00000085733  
ENSG00000105486  
ENSG00000160051  
ENSG00000165802  
ENSG00000114850  
ENSG00000177963  
ENSG00000112029  
ENSG00000126456  
ENSG00000145012  
ENSG00000050426

ENSG00000146535  
ENSG00000039523  
ENSG00000145041  
ENSG00000126214  
ENSG00000149658  
ENSG00000161533  
ENSG00000168268  
ENSG00000138674  
ENSG00000116237  
ENSG00000153048  
ENSG00000128191  
ENSG00000151465  
ENSG00000135535  
ENSG00000126777  
ENSG00000160445  
ENSG00000127666  
ENSG00000165175  
ENSG00000163935  
ENSG00000112078  
ENSG00000185340  
ENSG00000103342  
ENSG00000124596  
ENSG00000162062  
ENSG00000099330  
ENSG00000156256  
ENSG00000121957  
ENSG00000168795  
ENSG00000189060  
ENSG00000132466  
ENSG00000198265  
ENSG00000128595  
ENSG00000111348  
ENSG00000139083  
ENSG00000163714  
ENSG00000108312  
ENSG00000166166  
ENSG00000114767  
ENSG00000127125  
ENSG00000241973  
ENSG00000117475  
ENSG00000117523  
ENSG00000167085  
ENSG00000109534  
ENSG00000100029  
ENSG00000163946  
ENSG00000133226

ENSG00000075413  
ENSG00000124357  
ENSG00000005339  
ENSG00000136044  
ENSG00000145214  
ENSG00000061936  
ENSG00000138448  
ENSG00000196498  
ENSG00000137996  
ENSG00000156642  
ENSG00000182197  
ENSG00000180957  
ENSG00000088826  
ENSG00000137574  
ENSG00000119878  
ENSG00000130254  
ENSG00000184708  
ENSG00000113300  
ENSG00000170266  
ENSG00000108064  
ENSG00000115275  
ENSG00000027697  
ENSG00000165283  
ENSG00000025434  
ENSG00000147955  
ENSG00000141577  
ENSG00000155008  
ENSG00000136935  
ENSG00000115525  
ENSG00000128050  
ENSG00000161813  
ENSG00000041880  
ENSG00000124151  
ENSG00000138413  
ENSG00000156958  
ENSG00000080815  
ENSG00000115806  
ENSG00000125952  
ENSG00000130779  
ENSG00000186153  
ENSG00000157184  
ENSG00000111652  
ENSG00000186908  
ENSG00000145730  
ENSG00000180104  
ENSG00000205937

ENSG00000101945  
ENSG00000115756  
ENSG00000107537  
ENSG00000135315  
ENSG00000120837  
ENSG00000181938  
ENSG00000033867  
ENSG00000137275  
ENSG00000122779  
ENSG00000100664  
ENSG00000101150  
ENSG00000174442  
ENSG00000143771  
ENSG00000148218  
ENSG00000105875  
ENSG00000062650  
ENSG00000111669  
ENSG00000176390  
ENSG00000175183  
ENSG00000116459  
ENSG00000198931  
ENSG00000047578  
ENSG00000062598  
ENSG00000100577  
ENSG00000072415  
ENSG00000134186  
ENSG00000132661  
ENSG00000198825  
ENSG00000104859  
ENSG00000100347  
ENSG00000071794  
ENSG00000100263  
ENSG00000128989  
ENSG00000105677  
ENSG00000066777  
ENSG00000171174  
ENSG00000141258  
ENSG00000140382  
ENSG00000105778  
ENSG00000165516  
ENSG00000108559  
ENSG00000145439  
ENSG00000178605  
ENSG00000174652  
ENSG00000100038  
ENSG00000160613

ENSG00000033170  
ENSG00000068079  
ENSG00000125485  
ENSG00000064666  
ENSG00000092621  
ENSG00000119004  
ENSG00000091127  
ENSG00000103496  
ENSG00000183751  
ENSG00000156261  
ENSG00000083444  
ENSG00000169231  
ENSG00000169871  
ENSG00000028310  
ENSG00000004866  
ENSG00000121067  
ENSG00000198839  
ENSG00000137825  
ENSG00000127980  
ENSG00000129691  
ENSG00000160703  
ENSG00000135912  
ENSG00000116750  
ENSG00000133027  
ENSG00000070770  
ENSG00000155097  
ENSG00000173065  
ENSG00000071054  
ENSG00000177192  
ENSG00000112249  
ENSG00000132640  
ENSG00000196704  
ENSG00000143799  
ENSG00000115310  
ENSG00000068878  
ENSG00000137817  
ENSG00000163719  
ENSG00000198721  
ENSG00000178814  
ENSG00000181789  
ENSG00000167193  
ENSG00000144674  
ENSG00000177169  
ENSG00000065268  
ENSG00000090097  
ENSG00000183520

ENSG00000126602  
ENSG00000170348  
ENSG00000124635  
ENSG00000163539  
ENSG00000169714  
ENSG00000100994  
ENSG00000139131  
ENSG00000165804  
ENSG00000111011  
ENSG00000165271  
ENSG00000100612  
ENSG00000120053  
ENSG00000081721  
ENSG00000094880  
ENSG00000127452  
ENSG00000115091  
ENSG00000079432  
ENSG00000186871  
ENSG00000118007  
ENSG00000163703  
ENSG00000101220  
ENSG00000112110  
ENSG00000135387  
ENSG00000134909  
ENSG00000230989  
ENSG00000136856  
ENSG00000143198  
ENSG00000138081  
ENSG00000120910  
ENSG00000106404  
ENSG00000036549  
ENSG00000180879  
ENSG00000174446  
ENSG00000110274  
ENSG00000058262  
ENSG00000087502  
ENSG00000065485  
ENSG00000137055  
ENSG00000111880  
ENSG00000122545  
ENSG00000204217  
ENSG00000140307  
ENSG00000171603  
ENSG00000079739  
ENSG00000177981  
ENSG00000107175

ENSG00000113810  
ENSG00000109323  
ENSG00000100714  
ENSG00000169826  
ENSG00000163479  
ENSG00000067182  
ENSG00000188786  
ENSG00000160688  
ENSG00000114491  
ENSG00000242485  
ENSG00000075539  
ENSG00000197081  
ENSG00000130713  
ENSG00000021574  
ENSG00000197746  
ENSG00000101391  
ENSG00000123737  
ENSG00000102119  
ENSG00000132763  
ENSG00000157191  
ENSG00000133872  
ENSG00000112367  
ENSG00000092978  
ENSG00000167967  
ENSG00000100075  
ENSG00000125744  
ENSG00000139687  
ENSG00000082068  
ENSG00000165264  
ENSG00000103197  
ENSG00000127527  
ENSG00000171914  
ENSG00000156587  
ENSG00000115364  
ENSG00000108561  
ENSG00000171608  
ENSG00000188690  
ENSG00000198522  
ENSG00000198369  
ENSG00000168092  
ENSG00000119862  
ENSG00000136875  
ENSG00000005889  
ENSG00000164331  
ENSG00000104299  
ENSG00000067225

ENSG00000104852  
ENSG00000138750  
ENSG00000109572  
ENSG00000130787  
ENSG00000100697  
ENSG00000085760  
ENSG00000176834  
ENSG00000107959  
ENSG00000169217  
ENSG00000172053  
ENSG00000173145  
ENSG00000107140  
ENSG00000164190  
ENSG00000132541  
ENSG00000111247  
ENSG00000179604  
ENSG00000198142  
ENSG00000169696  
ENSG00000139644  
ENSG00000198060  
ENSG00000164576  
ENSG00000113441  
ENSG00000137942  
ENSG00000187840  
ENSG00000149269  
ENSG00000196821  
ENSG00000077254  
ENSG00000166575  
ENSG00000095319  
ENSG00000176476  
ENSG00000165494  
ENSG00000090013  
ENSG00000142409  
ENSG00000079462  
ENSG00000046651  
ENSG00000174444  
ENSG00000126243  
ENSG00000125691  
ENSG00000107938  
ENSG00000107566  
ENSG00000070081  
ENSG00000084676  
ENSG00000172493  
ENSG00000096433  
ENSG00000185722  
ENSG00000137207

ENSG00000117859  
ENSG00000168487  
ENSG00000152556  
ENSG00000117054  
ENSG00000164167  
ENSG00000124789  
ENSG00000127993  
ENSG00000105254  
ENSG00000115942  
ENSG00000156239  
ENSG00000198130  
ENSG00000115365  
ENSG00000070718  
ENSG00000106477  
ENSG00000198589  
ENSG00000165671  
ENSG00000015532  
ENSG00000140750  
ENSG00000148908  
ENSG00000101442  
ENSG00000170522  
ENSG00000128791  
ENSG00000119640  
ENSG00000147224  
ENSG00000135916  
ENSG00000134253  
ENSG00000097021  
ENSG00000072786  
ENSG00000196712  
ENSG00000106397  
ENSG00000145022  
ENSG00000124766  
ENSG00000169188  
ENSG00000183726  
ENSG00000161980  
ENSG00000113460  
ENSG00000100462  
ENSG00000160710  
ENSG00000162384  
ENSG00000148468  
ENSG00000111142  
ENSG00000113384  
ENSG00000132471  
ENSG00000007168  
ENSG00000113387  
ENSG00000095261

ENSG00000064199  
ENSG00000186866  
ENSG00000185024  
ENSG00000166557  
ENSG00000157216  
ENSG00000032444  
ENSG00000005801  
ENSG00000111696  
ENSG00000092531  
ENSG00000087095  
ENSG00000151849  
ENSG00000136754  
ENSG00000182199  
ENSG00000204237  
ENSG00000122042  
ENSG00000106733  
ENSG00000106245  
ENSG00000165280  
ENSG00000108424  
ENSG00000082701  
ENSG00000100578  
ENSG00000135108  
ENSG00000196839  
ENSG00000027001  
ENSG00000178252  
ENSG00000183763  
ENSG00000072736  
ENSG00000134697  
ENSG00000156304  
ENSG00000135473  
ENSG00000138399  
ENSG00000178096  
ENSG00000130332  
ENSG00000164978  
ENSG00000132382  
ENSG00000069275  
ENSG00000148229  
ENSG00000188313  
ENSG00000063176  
ENSG00000122678  
ENSG00000101266  
ENSG00000130939  
ENSG00000108094  
ENSG00000136861  
ENSG00000143156  
ENSG00000118900

ENSG00000160226  
ENSG00000175416  
ENSG00000168827  
ENSG00000198055  
ENSG00000112759  
ENSG00000149187  
ENSG00000197930  
ENSG00000082213  
ENSG00000114978  
ENSG00000112335  
ENSG00000124532  
ENSG00000134779  
ENSG00000115524  
ENSG00000196352  
ENSG00000158195  
ENSG00000177156  
ENSG00000011304  
ENSG00000137076  
ENSG00000159346  
ENSG00000113318  
ENSG00000160908  
ENSG00000141568  
ENSG00000177889  
ENSG00000179091  
ENSG00000066422  
ENSG00000168411  
ENSG00000129158  
ENSG00000198740  
ENSG00000125877  
ENSG00000197429  
ENSG00000102893  
ENSG00000109089  
ENSG00000196290  
ENSG00000127220  
ENSG00000175130  
ENSG00000128309  
ENSG00000076043  
ENSG00000147416  
ENSG00000197747  
ENSG00000117569  
ENSG00000074356  
ENSG00000146872  
ENSG00000176871  
ENSG00000056972  
ENSG00000173473  
ENSG00000074755

ENSG00000136628  
ENSG00000171067  
ENSG00000067533  
ENSG00000105656  
ENSG00000141279  
ENSG00000074054  
ENSG00000141696  
ENSG00000138382  
ENSG00000094631  
ENSG00000184076  
ENSG00000100749  
ENSG00000025772  
ENSG00000100242  
ENSG00000166821  
ENSG00000139531  
ENSG00000213341  
ENSG00000107960  
ENSG00000134825  
ENSG00000161542  
ENSG00000076928  
ENSG00000137504  
ENSG00000126067  
ENSG00000126773  
ENSG00000179918  
ENSG00000143774  
ENSG00000103365  
ENSG00000123352  
ENSG00000121073  
ENSG00000224051  
ENSG00000104980  
ENSG00000167657  
ENSG00000111711  
ENSG00000090487  
ENSG00000115484  
ENSG00000102900  
ENSG00000150401  
ENSG00000122965  
ENSG00000102226  
ENSG00000125827  
ENSG00000068323  
ENSG00000103876  
ENSG00000151461  
ENSG00000100360  
ENSG00000153317  
ENSG00000086065  
ENSG00000177971

ENSG00000134684  
ENSG00000119689  
ENSG00000119522  
ENSG00000115504  
ENSG00000136271  
ENSG00000171503  
ENSG00000161638  
ENSG00000074603  
ENSG00000031691  
ENSG00000001497  
ENSG00000164934  
ENSG00000134001  
ENSG00000064102  
ENSG00000137764  
ENSG00000106554  
ENSG00000158793  
ENSG00000140386  
ENSG00000154945  
ENSG00000156345  
ENSG00000068697  
ENSG00000105355  
ENSG00000176619  
ENSG00000140943  
ENSG00000115084  
ENSG00000100348  
ENSG00000167658  
ENSG00000186591  
ENSG00000106524  
ENSG00000108669  
ENSG00000186106  
ENSG00000184840  
ENSG00000172113  
ENSG00000143537  
ENSG00000100393  
ENSG00000064115  
ENSG00000225921  
ENSG00000142856  
ENSG00000101365  
ENSG00000135336  
ENSG00000057608  
ENSG00000105258  
ENSG00000160584  
ENSG00000105559  
ENSG00000100796  
ENSG00000169764  
ENSG00000115993

ENSG00000135966  
ENSG00000068438  
ENSG00000120705  
ENSG00000049167  
ENSG00000159322  
ENSG00000128708  
ENSG00000110955  
ENSG00000103335  
ENSG00000115947  
ENSG00000009954  
ENSG00000101557  
ENSG00000101911  
ENSG00000100324  
ENSG00000141867  
ENSG00000206560  
ENSG00000119812  
ENSG00000092208  
ENSG00000064651  
ENSG00000055070  
ENSG00000141378  
ENSG00000117751  
ENSG00000119977  
ENSG00000110108  
ENSG00000063245  
ENSG00000138363  
ENSG00000082014  
ENSG00000076944  
ENSG00000117748  
ENSG00000198042  
ENSG00000137364  
ENSG00000150967  
ENSG00000158863  
ENSG00000183495  
ENSG00000101474  
ENSG00000071462  
ENSG00000110917  
ENSG00000164105  
ENSG00000172795  
ENSG00000174606  
ENSG00000168564  
ENSG00000142546  
ENSG00000185627  
ENSG00000105135  
ENSG00000141759  
ENSG00000171298  
ENSG00000165669

ENSG00000116017  
ENSG00000006007  
ENSG00000124299  
ENSG00000119844  
ENSG00000065526  
ENSG00000104973  
ENSG00000175048  
ENSG00000175470  
ENSG00000117877  
ENSG00000141232  
ENSG00000142507  
ENSG00000104964  
ENSG00000105281  
ENSG00000143033  
ENSG00000143337  
ENSG00000186141  
ENSG00000103852  
ENSG00000129484  
ENSG00000115216  
ENSG00000120942  
ENSG00000166794  
ENSG00000105698  
ENSG00000129933  
ENSG00000130005  
ENSG00000134291  
ENSG00000107020  
ENSG00000146476  
ENSG00000135250  
ENSG00000179335  
ENSG00000163686  
ENSG00000113734  
ENSG00000111875  
ENSG00000136816  
ENSG00000125741  
ENSG00000170638  
ENSG00000074696  
ENSG00000143224  
ENSG00000076242  
ENSG00000173726  
ENSG00000166619  
ENSG00000115425  
ENSG00000087087  
ENSG00000166848  
ENSG00000144567  
ENSG00000184436  
ENSG00000120709

ENSG00000071655  
ENSG00000177663  
ENSG00000136810  
ENSG00000109466  
ENSG00000013583  
ENSG00000108518  
ENSG00000123415  
ENSG00000116406  
ENSG00000119705  
ENSG00000108469  
ENSG00000168256  
ENSG00000167291  
ENSG00000063854  
ENSG00000108788  
ENSG00000151779  
ENSG00000185728  
ENSG00000184967  
ENSG00000106105  
ENSG00000106052  
ENSG00000113658  
ENSG00000175550  
ENSG00000122515  
ENSG00000136925  
ENSG00000187626  
ENSG00000137073  
ENSG00000100104  
ENSG00000144028  
ENSG00000115211  
ENSG00000153885  
ENSG00000100991  
ENSG00000184381  
ENSG00000122490  
ENSG00000163399  
ENSG00000067248  
ENSG00000106330  
ENSG00000143793  
ENSG00000105676  
ENSG00000136143  
ENSG00000131116  
ENSG00000131591  
ENSG00000196743  
ENSG00000165704  
ENSG00000117222  
ENSG00000032389  
ENSG00000100815  
ENSG00000189306

ENSG00000141456  
ENSG00000134375  
ENSG00000141367  
ENSG00000138085  
ENSG00000168374  
ENSG00000064545  
ENSG00000185187  
ENSG00000110330  
ENSG00000151422  
ENSG00000138073  
ENSG00000119777  
ENSG00000125458  
ENSG00000104671  
ENSG00000013288  
ENSG00000168090  
ENSG00000172775  
ENSG00000134644  
ENSG00000108604  
ENSG00000102054  
ENSG00000154229  
ENSG00000070423  
ENSG00000121774  
ENSG00000127054  
ENSG00000115514  
ENSG00000100711  
ENSG00000131374  
ENSG00000166226  
ENSG00000151093  
ENSG00000156253  
ENSG00000172009  
ENSG00000108091  
ENSG00000143499  
ENSG00000106089  
ENSG00000125835  
ENSG00000088682  
ENSG00000148384  
ENSG00000109736  
ENSG00000105341  
ENSG00000181852  
ENSG00000196199  
ENSG00000100596  
ENSG00000119912  
ENSG00000196284  
ENSG00000138594  
ENSG00000124226  
ENSG00000173511

ENSG00000117360  
ENSG00000169032  
ENSG00000148660  
ENSG00000169692  
ENSG00000176393  
ENSG00000166024  
ENSG00000204852  
ENSG00000135698  
ENSG00000166925  
ENSG00000213339  
ENSG00000096717  
ENSG00000169750  
ENSG00000099917  
ENSG00000097007  
ENSG00000102967  
ENSG00000033030  
ENSG00000075240  
ENSG00000081913  
ENSG00000101986  
ENSG00000117602  
ENSG00000111802  
ENSG00000050393  
ENSG00000087274  
ENSG00000100567  
ENSG00000163870  
ENSG00000173889  
ENSG00000159063  
ENSG00000143621  
ENSG00000106144  
ENSG00000055130  
ENSG00000164896  
ENSG00000187147  
ENSG00000174799  
ENSG00000104497  
ENSG00000084754  
ENSG00000167106  
ENSG00000115317  
ENSG00000127616  
ENSG00000105771  
ENSG00000177082  
ENSG00000158710  
ENSG00000169762  
ENSG00000046647  
ENSG00000102218  
ENSG00000112941  
ENSG00000178950

ENSG00000105879  
ENSG00000167380  
ENSG00000170779  
ENSG00000108960  
ENSG00000169718  
ENSG00000148985  
ENSG00000177054  
ENSG00000157916  
ENSG00000116698  
ENSG00000104320  
ENSG00000101843  
ENSG00000023041  
ENSG00000089289  
ENSG00000039650  
ENSG00000147649  
ENSG00000159720  
ENSG00000182158  
ENSG00000116898  
ENSG00000122126  
ENSG00000167535  
ENSG00000105705  
ENSG00000140992  
ENSG00000168488  
ENSG00000163344  
ENSG00000103066  
ENSG00000087338  
ENSG00000155324  
ENSG00000085719  
ENSG00000155229  
ENSG00000180901  
ENSG00000181104  
ENSG00000153029  
ENSG00000100425  
ENSG00000120800  
ENSG00000118762  
ENSG00000104660  
ENSG00000121060  
ENSG00000178057  
ENSG00000165672  
ENSG00000117153  
ENSG00000081760  
ENSG00000145833  
ENSG00000119041  
ENSG00000171456  
ENSG00000011405  
ENSG00000071626

ENSG00000079277  
ENSG00000053770  
ENSG00000168476  
ENSG00000169223  
ENSG00000126883  
ENSG00000133059  
ENSG00000167272  
ENSG00000162368  
ENSG00000075415  
ENSG00000138375  
ENSG00000102572  
ENSG00000221914  
ENSG00000133773  
ENSG00000023734  
ENSG00000114331  
ENSG00000100387  
ENSG00000177666  
ENSG00000117448  
ENSG00000083635  
ENSG00000005238  
ENSG00000229809  
ENSG00000042088  
ENSG00000144120  
ENSG00000158019  
ENSG00000198646  
ENSG00000158234  
ENSG00000151748  
ENSG00000163444  
ENSG00000128534  
ENSG00000163913  
ENSG00000088247  
ENSG00000077348  
ENSG00000103051  
ENSG00000144746  
ENSG00000182704  
ENSG00000099864  
ENSG00000112624  
ENSG00000160917  
ENSG00000100601  
ENSG00000136451  
ENSG0000013563  
ENSG00000049541  
ENSG00000102910  
ENSG00000002919  
ENSG00000130816  
ENSG00000132792

ENSG00000092820  
ENSG00000032742  
ENSG00000175224  
ENSG00000159461  
ENSG00000135686  
ENSG00000106617  
ENSG00000176108  
ENSG00000183475  
ENSG00000041802  
ENSG00000067365  
ENSG00000100983  
ENSG00000135723  
ENSG00000130956  
ENSG00000123268  
ENSG00000102753  
ENSG00000015153  
ENSG00000140521  
ENSG00000102921  
ENSG00000198162  
ENSG00000184205  
ENSG00000169020  
ENSG00000150779  
ENSG00000101166  
ENSG00000101199  
ENSG00000156860  
ENSG00000185838  
ENSG00000012983  
ENSG00000156502  
ENSG00000143952  
ENSG00000073060  
ENSG00000090266  
ENSG00000112146  
ENSG00000158006  
ENSG00000166747  
ENSG00000070366  
ENSG00000197043  
ENSG00000108828  
ENSG00000012061  
ENSG00000105576  
ENSG00000166228  
ENSG00000117280  
ENSG00000006712  
ENSG00000112242  
ENSG00000168958  
ENSG00000114982  
ENSG00000004142

ENSG00000128951  
ENSG00000077097  
ENSG00000138642  
ENSG00000109184  
ENSG00000134815  
ENSG00000120533  
ENSG00000127445  
ENSG00000148719  
ENSG00000130024  
ENSG00000083857  
ENSG00000103257  
ENSG00000001167  
ENSG00000168556  
ENSG00000097033  
ENSG00000165916  
ENSG00000122873  
ENSG00000197562  
ENSG00000145907  
ENSG00000100325  
ENSG00000113758  
ENSG00000143437  
ENSG00000115866  
ENSG00000160113  
ENSG00000115170  
ENSG00000113583  
ENSG00000101811  
ENSG00000198689  
ENSG00000163558  
ENSG00000143126  
ENSG00000151414  
ENSG00000126226  
ENSG00000107164  
ENSG00000130312  
ENSG00000176248  
ENSG00000126457  
ENSG00000106399  
ENSG00000182185  
ENSG00000143486  
ENSG00000175110  
ENSG00000099331  
ENSG00000092096  
ENSG00000086504  
ENSG00000074071  
ENSG00000108582  
ENSG00000101367  
ENSG00000178921

ENSG00000115568  
ENSG00000125779  
ENSG00000071553  
ENSG00000145293  
ENSG00000167720  
ENSG00000065613  
ENSG00000164587  
ENSG00000129250  
ENSG00000014824  
ENSG00000073536  
ENSG00000165525  
ENSG00000163466  
ENSG00000075188  
ENSG00000099804  
ENSG00000101473  
ENSG00000156873  
ENSG00000113194  
ENSG00000136521  
ENSG00000110075  
ENSG00000102125  
ENSG00000188677  
ENSG00000038532  
ENSG00000176407  
ENSG00000112365  
ENSG00000119720  
ENSG00000108671  
ENSG00000168286  
ENSG00000069966  
ENSG00000168175  
ENSG00000147536  
ENSG00000168214  
ENSG00000128694  
ENSG00000109519  
ENSG00000070614  
ENSG00000131828  
ENSG00000141030  
ENSG00000126768  
ENSG00000196396  
ENSG00000103145  
ENSG00000107949  
ENSG00000167173  
ENSG00000150787  
ENSG00000141543  
ENSG00000143164  
ENSG00000132906  
ENSG00000112697

ENSG00000146733  
ENSG00000100227  
ENSG00000116213  
ENSG00000123191  
ENSG00000172667  
ENSG00000197045  
ENSG00000170860  
ENSG00000168806  
ENSG00000164051  
ENSG00000069869  
ENSG00000196459  
ENSG00000140400  
ENSG00000141452  
ENSG00000105176  
ENSG00000074582  
ENSG00000119231  
ENSG00000133641  
ENSG00000138777  
ENSG00000031823  
ENSG00000164068  
ENSG00000075945  
ENSG00000136930  
ENSG00000138029  
ENSG00000104886  
ENSG00000169251  
ENSG00000182087  
ENSG00000068796  
ENSG00000174243  
ENSG00000101888  
ENSG00000084652  
ENSG00000150961  
ENSG00000112282  
ENSG00000173402  
ENSG00000185504  
ENSG00000125450  
ENSG00000106333  
ENSG00000187555  
ENSG00000119431  
ENSG00000108528  
ENSG00000109606  
ENSG00000108395  
ENSG00000164654  
ENSG00000117697  
ENSG00000126261  
ENSG00000126870  
ENSG00000129925

ENSG00000170310  
ENSG00000188342  
ENSG00000132275  
ENSG00000165688  
ENSG00000111897  
ENSG00000132912  
ENSG00000082258  
ENSG00000064313  
ENSG00000120688  
ENSG00000100216  
ENSG00000139620  
ENSG00000028528  
ENSG00000140365  
ENSG00000136485  
ENSG00000031698  
ENSG00000168884  
ENSG00000164930  
ENSG00000110080  
ENSG00000118600  
ENSG00000138768  
ENSG00000108599  
ENSG00000114573  
ENSG00000143321  
ENSG00000137414  
ENSG00000174720  
ENSG00000132294  
ENSG00000115307  
ENSG00000126003  
ENSG00000187446  
ENSG00000155368  
ENSG00000132781  
ENSG00000078142  
ENSG00000110395  
ENSG00000166847  
ENSG00000124486  
ENSG00000088035  
ENSG00000221838  
ENSG00000144048  
ENSG00000070761  
ENSG00000132952  
ENSG00000137947  
ENSG00000162073  
ENSG00000111596  
ENSG00000114316  
ENSG00000163785  
ENSG00000132670

ENSG00000146826  
ENSG00000100294  
ENSG00000123066  
ENSG00000120868  
ENSG00000167671  
ENSG00000135249  
ENSG00000085377  
ENSG00000170275  
ENSG00000050405  
ENSG00000123983  
ENSG00000150712  
ENSG00000196700  
ENSG00000167202  
ENSG00000145996  
ENSG00000157978  
ENSG00000145088  
ENSG00000174791  
ENSG00000168040  
ENSG00000129245  
ENSG00000104960  
ENSG00000143374  
ENSG00000081870  
ENSG00000088305  
ENSG00000008282  
ENSG00000165282  
ENSG00000165912  
ENSG00000108515  
ENSG00000132589  
ENSG00000174891  
ENSG00000075785  
ENSG00000138443  
ENSG00000151247  
ENSG00000197102  
ENSG00000117505  
ENSG00000114956  
ENSG00000103174  
ENSG00000066427  
ENSG00000090863  
ENSG00000139190  
ENSG00000141580  
ENSG00000120697  
ENSG00000129347  
ENSG00000101158  
ENSG00000181274  
ENSG00000144659  
ENSG00000135775

ENSG00000087053  
ENSG00000057663  
ENSG00000005302  
ENSG00000167685  
ENSG00000188352  
ENSG00000163781  
ENSG00000143457  
ENSG00000163872  
ENSG00000092931  
ENSG00000131931  
ENSG00000111144  
ENSG00000165792  
ENSG00000069849  
ENSG00000121749  
ENSG00000162607  
ENSG00000117597  
ENSG00000143314  
ENSG00000172270  
ENSG00000197324  
ENSG00000067560  
ENSG00000006194  
ENSG00000121964  
ENSG00000182858  
ENSG00000175582  
ENSG00000179941  
ENSG00000184209  
ENSG00000186566  
ENSG00000139505  
ENSG00000167196  
ENSG00000132825  
ENSG00000080345  
ENSG00000119392  
ENSG00000061938  
ENSG00000164885  
ENSG00000105556  
ENSG00000116353  
ENSG00000172465  
ENSG00000185808  
ENSG00000132388  
ENSG00000106392  
ENSG00000140395  
ENSG00000008324  
ENSG00000060688  
ENSG00000100280  
ENSG00000135945  
ENSG00000169241

ENSG00000104375  
ENSG00000125304  
ENSG00000142166  
ENSG00000136643  
ENSG00000130227  
ENSG00000165487  
ENSG00000166949  
ENSG00000137221  
ENSG00000058799  
ENSG00000134250  
ENSG00000168883  
ENSG00000126458  
ENSG00000171861  
ENSG00000178802  
ENSG00000178927  
ENSG00000104643  
ENSG00000103510  
ENSG00000165684  
ENSG00000112996  
ENSG00000117713  
ENSG00000164024  
ENSG00000108479  
ENSG00000086232  
ENSG00000185896  
ENSG00000140575  
ENSG00000182117  
ENSG00000177239  
ENSG00000042445  
ENSG00000113456  
ENSG00000103769  
ENSG00000171824  
ENSG00000111615  
ENSG00000081307  
ENSG00000114784  
ENSG00000120896  
ENSG00000117362  
ENSG00000125445  
ENSG00000181830  
ENSG00000103507  
ENSG00000088256  
ENSG00000081087  
ENSG00000091140  
ENSG00000124562  
ENSG00000169372  
ENSG00000154723  
ENSG00000178234

ENSG00000225697  
ENSG00000023608  
ENSG00000136731  
ENSG00000183943  
ENSG00000167323  
ENSG00000123349  
ENSG00000139722  
ENSG00000120733  
ENSG00000130560  
ENSG00000196636  
ENSG00000115998  
ENSG00000090316  
ENSG00000099624  
ENSG00000132109  
ENSG00000213672  
ENSG00000114302  
ENSG00000151665  
ENSG00000136940  
ENSG00000114388  
ENSG00000163634  
ENSG00000198952  
ENSG00000134910  
ENSG00000198648  
ENSG00000165660  
ENSG00000151729  
ENSG00000124535  
ENSG00000070476  
ENSG00000068120  
ENSG00000132603  
ENSG00000183808  
ENSG00000170852  
ENSG00000010165  
ENSG00000130714  
ENSG00000164002  
ENSG00000109814  
ENSG00000110063  
ENSG00000131236  
ENSG00000179364  
ENSG00000135677  
ENSG00000159658  
ENSG00000105248  
ENSG00000166266  
ENSG00000171302  
ENSG00000147601  
ENSG00000172331  
ENSG00000068097

ENSG00000108219  
ENSG00000135045  
ENSG00000083168  
ENSG00000008283  
ENSG00000145740  
ENSG00000136098  
ENSG00000157240  
ENSG00000119541  
ENSG00000122484  
ENSG00000117543  
ENSG00000158526  
ENSG00000072506  
ENSG00000090060  
ENSG00000142230  
ENSG00000108592  
ENSG00000123143  
ENSG00000114353  
ENSG00000140545  
ENSG00000125868  
ENSG00000166128  
ENSG00000143258  
ENSG00000116266  
ENSG00000153560  
ENSG00000108344  
ENSG00000109917  
ENSG00000139641  
ENSG00000182220  
ENSG00000148341  
ENSG00000110756  
ENSG00000103035  
ENSG00000134851  
ENSG00000181788  
ENSG00000111737  
ENSG00000164134  
ENSG00000092445  
ENSG00000105401  
ENSG00000067167  
ENSG00000100211  
ENSG00000033178  
ENSG00000137944  
ENSG00000198898  
ENSG00000120742  
ENSG00000198746  
ENSG00000099942  
ENSG00000128789  
ENSG00000106100

ENSG00000081019  
ENSG00000011009  
ENSG00000132153  
ENSG00000172732  
ENSG00000182446  
ENSG00000196455  
ENSG00000129562  
ENSG00000109775  
ENSG00000005156  
ENSG00000011007  
ENSG00000104517  
ENSG00000122971  
ENSG00000136436  
ENSG00000065000  
ENSG00000114554  
ENSG00000110060  
ENSG00000164924  
ENSG00000198000  
ENSG00000153786  
ENSG00000162390  
ENSG00000182307  
ENSG00000144579  
ENSG00000183283  
ENSG00000197858  
ENSG00000167842  
ENSG00000164111  
ENSG00000228300  
ENSG00000136146  
ENSG00000178188  
ENSG00000117758  
ENSG00000116212  
ENSG00000018610  
ENSG00000127884  
ENSG00000158792  
ENSG00000090857  
ENSG00000008838  
ENSG00000116874  
ENSG00000184897  
ENSG00000135823  
ENSG00000102974  
ENSG00000159377  
ENSG00000106367  
ENSG00000103978  
ENSG00000173085  
ENSG00000124279  
ENSG00000168056

ENSG00000179562  
ENSG00000137563  
ENSG00000084073  
ENSG00000156471  
ENSG00000003509  
ENSG00000100056  
ENSG00000147400  
ENSG00000123178  
ENSG00000067704  
ENSG00000182544  
ENSG00000142751  
ENSG00000164574  
ENSG00000009307  
ENSG00000135974  
ENSG00000130985  
ENSG00000106609  
ENSG00000103995  
ENSG00000119401  
ENSG00000104884  
ENSG00000126070  
ENSG00000175283  
ENSG00000196505  
ENSG00000102738  
ENSG00000141026  
ENSG00000130725  
ENSG00000051620  
ENSG00000171100  
ENSG00000107651  
ENSG00000110768  
ENSG00000089775  
ENSG00000073050  
ENSG00000196150  
ENSG00000110107  
ENSG00000117410  
ENSG00000125149  
ENSG00000182810  
ENSG00000123159  
ENSG00000108039  
ENSG00000047621  
ENSG00000173757  
ENSG00000148429  
ENSG00000154845  
ENSG00000110344  
ENSG00000110442  
ENSG00000155959  
ENSG00000184277

ENSG00000169180  
ENSG00000177697  
ENSG00000178719  
ENSG00000140391  
ENSG00000172992  
ENSG00000104221  
ENSG00000109270  
ENSG00000125651  
ENSG00000134014  
ENSG00000088298  
ENSG00000006451  
ENSG00000160551  
ENSG00000157933  
ENSG00000131873  
ENSG00000100109  
ENSG00000196683  
ENSG00000138617  
ENSG00000135297  
ENSG00000132323  
ENSG00000125656  
ENSG00000063241  
ENSG00000135372  
ENSG00000115286  
ENSG00000158290  
ENSG00000140526  
ENSG00000166452  
ENSG00000156735  
ENSG00000135632  
ENSG00000172269  
ENSG00000178105  
ENSG00000100722  
ENSG00000147677  
ENSG00000071889  
ENSG00000082641  
ENSG00000132356  
ENSG00000115073  
ENSG00000113048  
ENSG00000143436  
ENSG00000129460  
ENSG00000185043  
ENSG00000064490  
ENSG00000162227  
ENSG00000128915  
ENSG00000066855  
ENSG00000135801  
ENSG00000148396

ENSG00000074201  
ENSG00000154146  
ENSG00000076924  
ENSG00000151806  
ENSG00000165392  
ENSG00000149196  
ENSG00000112304  
ENSG00000119718  
ENSG00000112592  
ENSG00000003249  
ENSG00000100319  
ENSG00000147123  
ENSG00000150753  
ENSG00000164631  
ENSG00000146828  
ENSG00000103248  
ENSG00000166887  
ENSG00000085998  
ENSG00000040933  
ENSG00000090020  
ENSG00000130177  
ENSG00000111450  
ENSG00000158555  
ENSG00000100281  
ENSG00000042753  
ENSG00000135506  
ENSG00000153207  
ENSG00000099940  
ENSG00000114544  
ENSG00000076321  
ENSG00000112305  
ENSG00000164040  
ENSG00000012232  
ENSG00000100941  
ENSG00000109189  
ENSG00000054611  
ENSG00000149311  
ENSG00000178691  
ENSG00000163069  
ENSG00000137842  
ENSG00000183978  
ENSG00000177051  
ENSG00000213983  
ENSG00000175634  
ENSG00000171428  
ENSG00000181929

ENSG00000169221  
ENSG00000091039  
ENSG00000035687  
ENSG00000118579  
ENSG00000102890  
ENSG00000099910  
ENSG00000130159  
ENSG00000166913  
ENSG00000140157  
ENSG00000175220  
ENSG00000164062  
ENSG00000113812  
ENSG00000110925  
ENSG00000198961  
ENSG00000114648  
ENSG00000123810  
ENSG00000185163  
ENSG00000100416  
ENSG00000136807  
ENSG00000143155  
ENSG00000069248  
ENSG00000092203  
ENSG00000155393  
ENSG00000115816  
ENSG00000182054  
ENSG00000040531  
ENSG00000137500  
ENSG00000112685  
ENSG00000103091  
ENSG00000099995  
ENSG00000117143  
ENSG00000140948  
ENSG00000159202  
ENSG00000155876  
ENSG00000143149  
ENSG00000154719  
ENSG00000100296  
ENSG00000151348  
ENSG00000131043  
ENSG00000186432  
ENSG00000183291  
ENSG00000163541  
ENSG00000145780  
ENSG00000058056  
ENSG00000162694  
ENSG00000114054

ENSG00000156795  
ENSG00000151131  
ENSG00000164091  
ENSG00000181991  
ENSG00000103111  
ENSG00000119471  
ENSG00000182872  
ENSG00000133731  
ENSG00000125356  
ENSG00000198858  
ENSG00000139921  
ENSG00000165417  
ENSG00000171606  
ENSG00000043514  
ENSG00000144840  
ENSG00000168282  
ENSG00000163877  
ENSG00000204084  
ENSG00000184432  
ENSG00000121578  
ENSG00000175573  
ENSG00000116096  
ENSG00000105063  
ENSG00000130811  
ENSG00000100445  
ENSG00000164823  
ENSG00000075303  
ENSG00000156931  
ENSG00000160633  
ENSG00000136932  
ENSG00000144591  
ENSG00000150867  
ENSG00000147592  
ENSG00000124356  
ENSG00000198815  
ENSG00000140463  
ENSG00000204160  
ENSG00000058063  
ENSG00000173039  
ENSG00000009830  
ENSG00000106638  
ENSG00000128513  
ENSG00000138434  
ENSG00000101052  
ENSG00000134153  
ENSG00000166181

ENSG00000135624  
ENSG00000141582  
ENSG00000151332  
ENSG00000107745  
ENSG00000066651  
ENSG00000166333  
ENSG00000109079  
ENSG00000037749  
ENSG00000136631  
ENSG00000148730  
ENSG00000104408  
ENSG00000127774  
ENSG00000065548  
ENSG00000167394  
ENSG00000164168  
ENSG00000104812  
ENSG00000150768  
ENSG00000155508  
ENSG00000144909  
ENSG00000164405  
ENSG00000137161  
ENSG00000179526  
ENSG00000121680  
ENSG00000198218  
ENSG00000110958  
ENSG00000005206  
ENSG00000157500  
ENSG00000120137  
ENSG00000139291  
ENSG00000093010  
ENSG00000040199  
ENSG00000197265  
ENSG00000125870  
ENSG00000029639  
ENSG00000107560  
ENSG00000067829  
ENSG00000141084  
ENSG00000125375  
ENSG00000134996  
ENSG00000115241  
ENSG00000101247  
ENSG00000009335  
ENSG00000106635  
ENSG00000103249  
ENSG00000135829  
ENSG00000116906

ENSG00000136937  
ENSG00000182934  
ENSG00000166135  
ENSG00000172086  
ENSG00000146463  
ENSG00000181924  
ENSG00000167977  
ENSG00000136045  
ENSG00000126267  
ENSG00000071859  
ENSG00000143379  
ENSG00000141562  
ENSG00000109065  
ENSG00000133884  
ENSG00000169599  
ENSG00000181555  
ENSG00000198924  
ENSG00000103932  
ENSG00000177105  
ENSG00000099795  
ENSG00000104969  
ENSG00000157911  
ENSG00000088179  
ENSG00000163904  
ENSG00000087191  
ENSG00000157212  
ENSG00000074319  
ENSG00000158864  
ENSG00000131375  
ENSG00000103126  
ENSG00000035928  
ENSG00000101350  
ENSG00000136478  
ENSG00000090054  
ENSG00000048828  
ENSG00000117118  
ENSG00000114383  
ENSG00000114354  
ENSG00000107815  
ENSG00000140497  
ENSG00000153046  
ENSG00000125166  
ENSG00000112357  
ENSG00000167770  
ENSG00000083838  
ENSG00000168522

ENSG00000123106  
ENSG00000185049  
ENSG00000086598  
ENSG00000166170  
ENSG00000151413  
ENSG00000125753  
ENSG00000102984  
ENSG00000111361  
ENSG00000020129  
ENSG00000104805  
ENSG00000166326  
ENSG00000140854  
ENSG00000140829  
ENSG00000112695  
ENSG00000164209  
ENSG00000096063  
ENSG00000124228  
ENSG00000172500  
ENSG00000113312  
ENSG00000113558  
ENSG00000130479  
ENSG00000170322  
ENSG00000110851  
ENSG00000156709  
ENSG00000100225  
ENSG00000114988  
ENSG00000114023  
ENSG00000135503  
ENSG00000174276  
ENSG00000108946  
ENSG00000039123  
ENSG00000136950  
ENSG00000141522  
ENSG00000134901  
ENSG00000163607  
ENSG00000110046  
ENSG00000139405  
ENSG00000153037  
ENSG00000178952  
ENSG00000103168  
ENSG00000111530  
ENSG00000164164  
ENSG00000085465  
ENSG00000146576  
ENSG00000095139  
ENSG00000143756

ENSG00000132024  
ENSG00000168653  
ENSG00000084090  
ENSG00000182512  
ENSG00000126746  
ENSG00000100241  
ENSG00000147457  
ENSG00000163902  
ENSG00000166272  
ENSG00000141542  
ENSG00000117133  
ENSG00000065427  
ENSG00000146701  
ENSG00000145715  
ENSG00000103245  
ENSG00000087263  
ENSG00000175895  
ENSG00000108423  
ENSG00000170222  
ENSG00000138801  
ENSG00000171155  
ENSG00000100442  
ENSG00000105849  
ENSG00000133895  
ENSG00000156983  
ENSG00000153767  
ENSG00000169567  
ENSG00000135956  
ENSG00000058729  
ENSG00000120756  
ENSG00000122958  
ENSG00000179271  
ENSG00000092841  
ENSG00000025800  
ENSG00000165458  
ENSG00000136238  
ENSG00000198855  
ENSG00000175216  
ENSG00000165806  
ENSG00000166454  
ENSG00000105671  
ENSG00000145191  
ENSG00000177045  
ENSG00000178307  
ENSG00000124209  
ENSG00000130684

ENSG00000149499  
ENSG00000101193  
ENSG00000004059  
ENSG00000174840  
ENSG00000196792  
ENSG00000164941  
ENSG00000140830  
ENSG00000149182  
ENSG00000084444  
ENSG00000117593  
ENSG0000013503  
ENSG00000152558  
ENSG00000105953  
ENSG00000077235  
ENSG00000149136  
ENSG00000122140  
ENSG00000104133  
ENSG00000176105  
ENSG00000104325  
ENSG00000080189  
ENSG00000102897  
ENSG00000136068  
ENSG00000157895  
ENSG00000114503  
ENSG00000144524  
ENSG00000111203  
ENSG00000114520  
ENSG00000091640  
ENSG00000100528  
ENSG00000111725  
ENSG00000166261  
ENSG00000089060  
ENSG00000131467  
ENSG00000104442  
ENSG00000180370  
ENSG00000175970  
ENSG00000164961  
ENSG00000072518  
ENSG00000009413  
ENSG00000179085  
ENSG00000162236  
ENSG00000148334  
ENSG00000130299  
ENSG00000123395  
ENSG00000189241  
ENSG00000116350

ENSG00000093144  
ENSG00000011376  
ENSG00000171204  
ENSG00000166478  
ENSG00000109390  
ENSG00000138614  
ENSG00000109016  
ENSG00000130733  
ENSG00000089876  
ENSG00000138459  
ENSG00000079785  
ENSG00000138794  
ENSG00000166002  
ENSG00000123064  
ENSG00000105755  
ENSG00000132005  
ENSG00000100412  
ENSG00000164253  
ENSG00000090432  
ENSG00000170855  
ENSG00000183258  
ENSG00000197157  
ENSG00000065029  
ENSG00000104331  
ENSG00000101343  
ENSG00000118217  
ENSG00000136908  
ENSG00000178694  
ENSG00000143653  
ENSG00000168538  
ENSG00000099203  
ENSG00000126247  
ENSG00000175348  
ENSG00000133704  
ENSG00000072778  
ENSG00000111540  
ENSG00000198677  
ENSG00000164880  
ENSG00000124459  
ENSG00000144848  
ENSG00000120333  
ENSG00000160714  
ENSG00000178913  
ENSG00000167792  
ENSG00000134152  
ENSG00000166908

ENSG00000168434  
ENSG00000103653  
ENSG00000167565  
ENSG00000118046  
ENSG00000132819  
ENSG00000135148  
ENSG00000109680  
ENSG00000125386  
ENSG00000132141  
ENSG00000107874  
ENSG00000148308  
ENSG00000154518  
ENSG00000141424  
ENSG00000089123  
ENSG00000080371  
ENSG00000139192  
ENSG00000171159  
ENSG00000196470  
ENSG00000113273  
ENSG00000164031  
ENSG00000087206  
ENSG00000035141  
ENSG00000136819  
ENSG00000100568  
ENSG00000163930  
ENSG00000092201  
ENSG00000214160  
ENSG00000111667  
ENSG00000129071  
ENSG00000107223  
ENSG00000198791  
ENSG00000151498  
ENSG00000006715  
ENSG00000065308  
ENSG00000175756  
ENSG00000132591  
ENSG00000163389  
ENSG00000151148  
ENSG00000226479  
ENSG00000126088  
ENSG00000183207  
ENSG00000104976  
ENSG00000137513  
ENSG00000121775  
ENSG00000105290  
ENSG00000176953

ENSG00000100258  
ENSG00000162434  
ENSG00000038002  
ENSG00000177733  
ENSG00000197323  
ENSG00000130748  
ENSG00000125991  
ENSG00000186111  
ENSG00000151576  
ENSG00000110697  
ENSG00000131408  
ENSG00000010803  
ENSG00000138593  
ENSG00000136986  
ENSG00000178741  
ENSG00000070501  
ENSG00000138757  
ENSG00000198586  
ENSG00000103502  
ENSG00000165678  
ENSG00000205629  
ENSG00000090989  
ENSG00000117174  
ENSG00000116688  
ENSG00000147475  
ENSG00000184990  
ENSG00000241258  
ENSG00000141219  
ENSG00000163374  
ENSG00000160305  
ENSG00000169018  
ENSG00000160785  
ENSG00000132128  
ENSG00000166855  
ENSG00000175073  
ENSG00000090061  
ENSG00000179151  
ENSG00000164889  
ENSG00000141985  
ENSG00000126062  
ENSG00000140374  
ENSG00000084693  
ENSG00000108352  
ENSG00000007520  
ENSG00000122705  
ENSG00000000457

ENSG00000116288  
ENSG00000154174  
ENSG00000143643  
ENSG00000169976  
ENSG00000137100  
ENSG00000130305  
ENSG00000133997  
ENSG00000102901  
ENSG00000106615  
ENSG00000119723  
ENSG00000129055  
ENSG00000159593  
ENSG00000109911  
ENSG00000176101  
ENSG00000060491  
ENSG00000185825  
ENSG00000101452  
ENSG00000105171  
ENSG00000181751  
ENSG00000103479  
ENSG00000166411  
ENSG00000112062  
ENSG00000198700  
ENSG00000054116  
ENSG00000156411  
ENSG00000007202  
ENSG00000172172  
ENSG00000011566  
ENSG00000104872  
ENSG00000112640  
ENSG00000160293  
ENSG00000197894  
ENSG00000004975  
ENSG00000135631  
ENSG00000075975  
ENSG00000186625  
ENSG00000101161  
ENSG00000186501  
ENSG00000183431  
ENSG00000174106  
ENSG00000107862  
ENSG00000079999  
ENSG00000125449  
ENSG00000153147  
ENSG00000114650  
ENSG00000185104

ENSG00000103495  
ENSG00000138246  
ENSG00000060749  
ENSG00000137824  
ENSG00000172273  
ENSG00000109381  
ENSG00000139625  
ENSG00000160959  
ENSG00000136827  
ENSG00000100220  
ENSG00000119013  
ENSG00000143183  
ENSG00000160993  
ENSG00000106400  
ENSG00000123609  
ENSG00000004777  
ENSG00000152102  
ENSG00000111412  
ENSG00000117691  
ENSG00000084072  
ENSG00000151445  
ENSG00000104412  
ENSG00000179262  
ENSG00000139579  
ENSG00000125755  
ENSG00000107829  
ENSG00000164081  
ENSG00000089693  
ENSG00000140598  
ENSG00000132842  
ENSG00000184857  
ENSG00000160294  
ENSG00000127837  
ENSG00000132017  
ENSG00000179134  
ENSG00000167118  
ENSG00000161395  
ENSG00000174165  
ENSG00000105298  
ENSG00000022976  
ENSG00000140688  
ENSG00000140471  
ENSG00000182979  
ENSG00000113282  
ENSG00000100532  
ENSG00000062725

ENSG00000119929  
ENSG00000156973  
ENSG00000121879  
ENSG00000067955  
ENSG00000114742  
ENSG00000130764  
ENSG00000115694  
ENSG00000177485  
ENSG00000175203  
ENSG00000172534  
ENSG00000176142  
ENSG00000130724  
ENSG00000196365  
ENSG00000068784  
ENSG00000114021  
ENSG00000158158  
ENSG00000178896  
ENSG00000101146  
ENSG00000197724  
ENSG00000174842  
ENSG00000115145  
ENSG00000105229  
ENSG00000203879  
ENSG00000105397  
ENSG00000198276  
ENSG00000170836  
ENSG00000133265  
ENSG00000183386  
ENSG00000138663  
ENSG00000167862  
ENSG00000140632  
ENSG00000087157  
ENSG00000176946  
ENSG00000105552  
ENSG00000114209  
ENSG00000167130  
ENSG00000004766  
ENSG00000135587  
ENSG00000139637  
ENSG00000141499  
ENSG00000106290  
ENSG00000122882  
ENSG00000100811  
ENSG00000172890  
ENSG00000116586  
ENSG00000177556

ENSG00000175324  
ENSG00000196235  
ENSG00000111832  
ENSG00000138071  
ENSG00000163161  
ENSG00000120798  
ENSG00000096080  
ENSG00000158850  
ENSG00000137815  
ENSG00000170260  
ENSG00000131748  
ENSG00000146729  
ENSG00000124688  
ENSG00000138802  
ENSG00000136715  
ENSG00000059691  
ENSG00000196544  
ENSG00000204859  
ENSG00000105726  
ENSG00000114902  
ENSG00000183735  
ENSG00000170291  
ENSG00000092020  
ENSG00000119383  
ENSG00000151881  
ENSG00000075142  
ENSG00000124214  
ENSG00000151503  
ENSG00000105402  
ENSG00000168259  
ENSG00000071994  
ENSG00000116747  
ENSG00000101138  
ENSG00000111786  
ENSG00000100564  
ENSG00000142208  
ENSG00000117036  
ENSG00000164919  
ENSG00000170633  
ENSG00000204104  
ENSG00000069329  
ENSG00000147654  
ENSG00000103005  
ENSG00000164258  
ENSG00000183665  
ENSG00000140104

ENSG00000027847  
ENSG00000135341  
ENSG00000104897  
ENSG00000101407  
ENSG00000183624  
ENSG00000111481  
ENSG00000129083  
ENSG00000177885  
ENSG00000142655  
ENSG00000126460  
ENSG00000164754  
ENSG00000141098  
ENSG00000143222  
ENSG00000141349  
ENSG00000110711  
ENSG00000130640  
ENSG00000111726  
ENSG00000101400  
ENSG00000115446  
ENSG00000108349  
ENSG00000196378  
ENSG00000188986  
ENSG00000140332  
ENSG00000144118  
ENSG00000029364  
ENSG00000174227  
ENSG00000163320  
ENSG00000175931  
ENSG00000149480  
ENSG00000188021  
ENSG00000104388  
ENSG00000113593  
ENSG00000198231  
ENSG00000110435  
ENSG00000177728  
ENSG00000128654  
ENSG00000171109  
ENSG00000074266  
ENSG00000211456  
ENSG00000172409  
ENSG00000108773  
ENSG00000132581  
ENSG00000107130  
ENSG00000166484  
ENSG00000101216  
ENSG00000162385

ENSG00000170502  
ENSG00000138231  
ENSG00000111358  
ENSG00000169410  
ENSG00000124702  
ENSG00000174938  
ENSG00000090372  
ENSG00000115649  
ENSG00000142686  
ENSG00000185591  
ENSG00000196642  
ENSG00000061273  
ENSG00000158796  
ENSG00000138785  
ENSG00000130726  
ENSG00000148331  
ENSG00000051382  
ENSG00000158480  
ENSG00000107263  
ENSG00000119421  
ENSG00000005007  
ENSG00000168288  
ENSG00000142892  
ENSG00000104129  
ENSG00000166595  
ENSG00000152700  
ENSG00000143761  
ENSG00000175104  
ENSG00000086589  
ENSG00000167487  
ENSG00000197056  
ENSG00000047188  
ENSG00000143753  
ENSG00000253729  
ENSG00000196652  
ENSG00000173226  
ENSG00000124198  
ENSG00000150776  
ENSG00000143418  
ENSG00000136381  
ENSG00000102078  
ENSG00000153339  
ENSG00000153774  
ENSG00000075856  
ENSG00000169564  
ENSG00000022840

ENSG00000081177  
ENSG00000162972  
ENSG00000133422  
ENSG00000166888  
ENSG00000168876  
ENSG00000140319  
ENSG00000126581  
ENSG00000069345  
ENSG00000105738  
ENSG00000171530  
ENSG00000120451  
ENSG00000061794  
ENSG00000008952  
ENSG00000162517  
ENSG00000131966  
ENSG00000145916  
ENSG00000130175  
ENSG00000105438  
ENSG00000138592  
ENSG00000156858  
ENSG00000101544  
ENSG00000078246  
ENSG00000131508  
ENSG00000181396  
ENSG00000102858  
ENSG00000171723  
ENSG00000081014  
ENSG00000075089  
ENSG00000143319  
ENSG00000117408  
ENSG00000078618  
ENSG00000083937  
ENSG00000013523  
ENSG00000065135  
ENSG00000094914  
ENSG00000162889  
ENSG00000173113  
ENSG00000072803  
ENSG00000170835  
ENSG00000130695  
ENSG00000143393  
ENSG00000065559  
ENSG00000105568  
ENSG00000130749  
ENSG00000037042  
ENSG00000161016

ENSG00000108591  
ENSG00000132694  
ENSG00000104957  
ENSG00000104853  
ENSG00000166167  
ENSG00000170604  
ENSG00000125447  
ENSG00000107290  
ENSG00000156482  
ENSG00000137806  
ENSG00000126107  
ENSG00000149313  
ENSG00000101189  
ENSG00000134255  
ENSG00000124659  
ENSG00000162775  
ENSG00000068394  
ENSG00000144744  
ENSG00000184402  
ENSG00000100603  
ENSG00000163159  
ENSG00000113838  
ENSG00000067596  
ENSG00000149243  
ENSG00000096401  
ENSG00000112855  
ENSG00000004487  
ENSG00000139197  
ENSG00000181027  
ENSG00000102871  
ENSG00000103549  
ENSG00000143294  
ENSG00000066117  
ENSG00000105520  
ENSG00000102981  
ENSG00000105053  
ENSG00000183155  
ENSG00000131269  
ENSG00000182149  
ENSG00000166860  
ENSG00000168591  
ENSG00000120008  
ENSG00000110696  
ENSG00000176473
