# Supplementary material for: A gene regulation model reveals an ancestral adaptation response to particulate exposure triggered by nanomaterials
Source: Research Square preprint supplement (doi:10.21203/rs.3.rs-1547187/v1), 2022-04-12
Supplement: Supplementary file 6 [file d759b9fa28b816f42216edec.pdf]

Table S8: Motif analysis non-mammal species

| GSE46958_Au.fasta |          |              |                        |      |
|-------------------|----------|--------------|------------------------|------|
| Motif             | E-value  | Sites        | Factorbook match       | Type |
| TCTTCTTCTTCYTCT   | 3.7e-062 | 3262 (48.9%) | CTCF                   | C2H2 |
| AAAAAAAAAAAAA     | 1.4e-028 | 2827 (42.4%) | <a href="#">ZNF362</a> | C2H2 |
| GAGAGAGAGAGAG     | 5.6e-021 | 1314 (19.7%) | ZNF596                 | C2H2 |
| WAGGCCCAWT        | 2.8e-019 | 1101 (16.5%) | ZFX                    | C2H2 |
| ACGACGTCGT        | 1.4e-017 | 782 (11.7%)  | BACH2                  |      |
| AAAACCTAAD        | 2.9e-013 | 1092 (16.4%) | ZFP3                   | C2H2 |
| GAAGAAGAGA        | 5.5e-012 | 2474 (37.1%) | AFF1                   |      |
| TATATATATATATAA   | 6.1e-012 | 1295 (19.4%) | ZNF140                 | C2H2 |
| TAATTAGTA         | 9.7e-012 | 2949 (44.2%) | MTA2                   |      |
| TAATTAADTAA       | 3.2e-010 | 836 (12.5%)  | ZNF140                 | C2H2 |
| AAGAAAGAAAMARA    | 3.1e-009 | 1464 (22.0%) | PKNOX1                 |      |
| AACCAAACCAA       | 7.8e-009 | 1329 (19.9%) | STAT2                  |      |
| AGCCCAWTAA        | 6.3e-008 | 456 (6.8%)   | ZNF585B                | C2H2 |
| GCAACAACAACAM     | 2.4e-007 | 586 (8.8%)   | FOXP1                  |      |
| AAGCCAWA          | 7.8e-007 | 844 (12.7%)  | ZNF449                 | C2H2 |
| CACACACACACACA    | 3.6e-006 | 329 (4.9%)   | ZNF148                 | C2H2 |
| GRTGATGATGA       | 1.7e-005 | 1689 (25.3%) | ATF7                   |      |
| CGGCGGAG          | 2.4e-005 | 794 (11.9%)  | NRF1                   |      |
| AAATCGAATTAT      | 3.6e-005 | 963 (14.4%)  | ESRRG                  |      |
| TGMCACGTGKCA      | 5.7e-005 | 393 (5.9%)   | MAZ                    | C2H2 |
| AGGAAAAAAAAAA     | 8.1e-005 | 788 (11.8%)  | ZNF362                 | C2H2 |
| ATCBRACGGT        | 1.9e-004 | 253 (3.8%)   | OVOL1                  | C2H2 |
| ACYAAACMM         | 3.4e-004 | 2128 (31.9%) | KLF4                   | C2H2 |
| AACAAAATAATAAA    | 4.5e-004 | 301 (4.5%)   | ZNF510                 | C2H2 |
| AAAGGTCAAAG       | 6.4e-004 | 146 (2.2%)   | NR2F6                  |      |
| AAAATTAATTAATAA   | 7.5e-004 | 1657 (24.9%) | HMGA2                  |      |
| ASTAGC            | 1.6e-003 | 2097 (31.5%) | OSR2                   | C2H2 |
| CAATGGCGG         | 6.9e-003 | 481 (7.2%)   | ZHX1                   | C2H2 |
| ACTTTGAATCCACWT   | 8.3e-003 | 91 (1.4%)    | ARID4A                 |      |
| CATAGTTTCA        | 8.3e-003 | 125 (1.9%)   | EP300                  |      |
| TATATA            | 9.2e-003 | 2182 (32.7%) | OTX2                   |      |

|                 |          |              |                 |      |
|-----------------|----------|--------------|-----------------|------|
| CCTAATCCCT      | 9.9e-003 | 207 (3.1%)   | OTX2            |      |
| GGCCCAW         | 1.5e-002 | 583 (8.7%)   | ZBED4           |      |
| ACGCAAACGY      | 1.7e-002 | 80 (1.2%)    | RELA            | C2H2 |
| CCGGTTCAA       | 2.0e-002 | 228 (3.4%)   | ZNF707          | C2H2 |
| AAATAAACCGAAT   | 3.5e-002 | 102 (1.5%)   | ZSCAN29         | C2H2 |
| ASAGAGAAGA      | 4.4e-002 | 852 (12.8%)  | ZNF775          | C2H2 |
| TATATATAC       | 5.5e-002 | 836 (12.5%)  | SREBF1          |      |
| TCACCGGAGM      | 5.6e-002 | 248 (3.7%)   | SREBF1          |      |
| ACAAGTAAAAC     | 6.8e-002 | 56 (0.8%)    | ETV6            |      |
| ATATATTTTGGW    | 7.6e-002 | 336 (5.0%)   | CTCF            | C2H2 |
| AATAATAATATA    | 1.0e-001 | 1273 (19.1%) | ZNF394          | C2H2 |
| CGRCGACT        | 1.2e-001 | 268 (4.0%)   | FOS             |      |
| ATCATCAW        | 1.3e-001 | 1054 (15.8%) | ZNF513          | C2H2 |
| GGAGGAGAAA      | 1.4e-001 | 115 (1.7%)   | NFXL1           |      |
| GTTATCTTACCAW   | 1.4e-001 | 59 (0.9%)    | ZNF639          | C2H2 |
| ATCCGTAATC      | 1.4e-001 | 72 (1.1%)    | OTX2            |      |
| ATTTTTAATTTCG   | 1.4e-001 | 56 (0.8%)    | CTCF            | C2H2 |
| ACCAAAA         | 1.6e-001 | 2360 (35.4%) | IKZF2           | C2H2 |
| ATCAATCA        | 1.6e-001 | 1501 (22.5%) | TSHZ2           | C2H2 |
| TGTCAACTAA      | 1.6e-001 | 126 (1.9%)   | EZH2phosphoT487 |      |
| CSGACCCGTTTA    | 1.7e-001 | 177 (2.7%)   | ZNF692          |      |
| GTGACTTTTTTCAR  | 2.4e-001 | 76 (1.1%)    | JUND            |      |
| TCTTTCTATCA     | 2.4e-001 | 66 (1.0%)    | ZNF512          | C2H2 |
| ATCACTAR        | 2.5e-001 | 380 (5.7%)   | CUX1            |      |
| ACAAAACAA       | 2.6e-001 | 1161 (17.4%) | ZNF384          | C2H2 |
| AAATCCTAAACTYT  | 2.8e-001 | 106 (1.6%)   | ZFP3            | C2H2 |
| GTAAAAAGTTAAAAC | 2.8e-001 | 80 (1.2%)    | HNF1A           |      |
| CCATCTCCACTCC   | 2.8e-001 | 61 (0.9%)    | FOS             |      |
| GATAATGAAAC     | 2.8e-001 | 59 (0.9%)    | STAT2           |      |
| TTAAAAATTTAAAAC | 2.8e-001 | 44 (0.7%)    | GTF3C2          |      |
| ACAAACAAAAAAA   | 3.0e-001 | 169 (2.5%)   | CEBPB           |      |
| AATTTGCA        | 3.9e-001 | 402 (6.0%)   | POU2F2          |      |
| MRCTGMAAC       | 4.1e-001 | 975 (14.6%)  | EP300           |      |
| AGACTYGAGWGS    | 4.5e-001 | 192 (2.9%)   | KMT2B           |      |
| CTAGTTAGCCCC    | 5.1e-001 | 67 (1.0%)    | SP2             | C2H2 |

|                  |          |              |         |      |
|------------------|----------|--------------|---------|------|
| ACRCCAAAAGAC     | 5.5e-001 | 72 (1.1%)    | EP300   |      |
| TCTGAAATCTGAATC  | 5.5e-001 | 36 (0.5%)    | SIX4    |      |
| AAATAGTAAA       | 6.2e-001 | 487 (7.3%)   | ZNF704  |      |
| AGTCAAC          | 7.5e-001 | 508 (7.6%)   | FOS     |      |
| CACTGAGTC        | 8.3e-001 | 90 (1.4%)    | TBL1XR1 |      |
| CCAACGCC         | 8.3e-001 | 85 (1.3%)    | NR5A2   |      |
| GATYCTAMTTGRATG  | 1.1e+000 | 75 (1.1%)    | FOSL2   |      |
| GACTCGAGCM       | 1.1e+000 | 71 (1.1%)    | ATF3    |      |
| GGCCYACACA       | 1.1e+000 | 64 (1.0%)    | HES1    |      |
| AATAAACAAAAWWTG  | 1.1e+000 | 58 (0.9%)    | ZNF19   | C2H2 |
| KCCGGAGAAGAY     | 1.1e+000 | 62 (0.9%)    |         |      |
| TCCTTGCTGAA      | 1.1e+000 | 52 (0.8%)    | ZNF121  | C2H2 |
| ATAGACTAAATATCT  | 1.1e+000 | 49 (0.7%)    | DZIP1   |      |
| AGTGACAAC        | 1.1e+000 | 106 (1.6%)   | TBX2    |      |
| AAAACCTCGGT      | 1.1e+000 | 53 (0.8%)    | ZNF766  | C2H2 |
| CTATATGTGTARYTT  | 1.1e+000 | 53 (0.8%)    | ZNF302  | C2H2 |
| ACATGAATGAATW    | 1.1e+000 | 73 (1.1%)    | ZNF24   | C2H2 |
| CTGGTYCGATTCWWA  | 1.1e+000 | 49 (0.7%)    | ATF3    |      |
| ATGATTTAGAAA     | 1.1e+000 | 51 (0.8%)    | NFE2L2  |      |
| AGTCRCA          | 1.1e+000 | 725 (10.9%)  | PAX5    |      |
| AATTAGTTAAC      | 1.3e+000 | 211 (3.2%)   | ZNF660  | C2H2 |
| TAATTA           | 1.3e+000 | 1602 (24.0%) | MTA2    |      |
| AGTGGTGGTRG      | 1.5e+000 | 143 (2.1%)   | NFATC3  |      |
| CGGATCGGCC       | 1.1e-002 | 1.5e+000     | CEBPB   |      |
| AAACCCTTGKAGT    | 1.5e+000 | 65 (1.0%)    | ZNF652  | C2H2 |
| AGCGCGTGR        | 1.6e+000 | 185 (2.8%)   | KDM5B   |      |
| ACAAAAACAAAG     | 1.6e+000 | 157 (2.4%)   | FOXP1   |      |
| ACAAAAATAAAAA    | 1.8e+000 | 205 (3.1%)   | PKNOX1  |      |
| ACACGTGT         | 1.8e+000 | 168 (2.5%)   | MXI1    |      |
| GGGGAAAATA       | 2.1e+000 | 434 (6.5%)   | ZNF639  | C2H2 |
| AAATCAAATCA      | 2.1e+000 | 470 (7.1%)   | RAD21   |      |
| CCKACCCGAA       | 2.2e+000 | 64 (1.0%)    | ZNF580  | C2H2 |
| AAAGAGAATCAACCAv | 2.2e+000 | 62 (0.9%)    | ZNF772  | C2H2 |
| GAAGRCTATTGAD    | 2.2e+000 | 66 (1.0%)    | ZNF146  | C2H2 |
| CAGCACAAGGAGAGG  | 2.2e+000 | 53 (0.8%)    | ZNF548  | C2H2 |

|                 |          |            |         |      |
|-----------------|----------|------------|---------|------|
| AGCTTTTGTAAAAGT | 2.2e+000 | 51 (0.8%)  |         |      |
| ACTCTAATAACAATA | 2.2e+000 | 50 (0.8%)  | GTF3C2  |      |
| CCTAAAGAACAAAT  | 2.2e+000 | 46 (0.7%)  | CTCF    | C2H2 |
| CTTATAGACCA     | 2.2e+000 | 44 (0.7%)  | TCF12   |      |
| AATTTAAGAAAAC   | 2.2e+000 | 43 (0.6%)  |         |      |
| ACAAAAAACGTGTA  | 2.2e+000 | 43 (0.6%)  | ZNF441  | C2H2 |
| ATGGACCCTGWRG   | 2.2e+000 | 43 (0.6%)  | ZNF335  | C2H2 |
| ATAACTCTCTCTACK | 2.2e+000 | 40 (0.6%)  | ZBTB40  | C2H2 |
| AATCGCTCTC      | 2.2e+000 | 47 (0.7%)  | ZNF596  | C2H2 |
| ACCGGTTAATG     | 2.2e+000 | 39 (0.6%)  | HNF1A   |      |
| GCAAAACCCMGSAAA | 2.2e+000 | 39 (0.6%)  | ZFP3    | C2H2 |
| GAGAATTTAAACATA | 2.2e+000 | 43 (0.6%)  | ZNF280A | C2H2 |
| TTCACCTGCAAAA   | 2.2e+000 | 37 (0.6%)  | RCOR2   |      |
| AACTTTATAAA     | 2.5e+000 | 155 (2.3%) | ZBTB40  | C2H2 |
| GAAACTAGAA      | 2.7e+000 | 87 (1.3%)  | ZNF143  | C2H2 |
| ATAAGTAAAAG     | 2.8e+000 | 130 (2.0%) | ZNF19   | C2H2 |
| ATTTGTGTCCAR    | 2.8e+000 | 95 (1.4%)  |         |      |
| ATATGAACAATTTGA | 2.8e+000 | 71 (1.1%)  | ZNF324  | C2H2 |
| GAAAAATGGGAA    | 2.8e+000 | 44 (0.7%)  | HDAC2   |      |
| CCACGTCAAY      | 3.2e+000 | 330 (5.0%) | XBP1    |      |
| GAAGAAAACAAAAA  | 3.5e+000 | 620 (9.3%) | foxj2   |      |
| CTCCTCCAC       | 3.7e+000 | 235 (3.5%) | ZNF263  | C2H2 |
| ATTATCCCA       | 4.1e+000 | 104 (1.6%) | KDM1A   |      |
| ACCGTWACGGT     | 4.5e+000 | 69 (1.0%)  | OVOL1   | C2H2 |
| AAACAAGTGATGS   | 4.5e+000 | 59 (0.9%)  | ZNF184  | C2H2 |
| AGTTTCTTCAATCTA | 4.5e+000 | 55 (0.8%)  | ZNF558  | C2H2 |
| AAACCTCAAAAA    | 4.5e+000 | 58 (0.9%)  | MLLT1   |      |
| AAATGTAAAACGTW  | 4.5e+000 | 47 (0.7%)  | ZNF354B | C2H2 |
| CCATTTCCCAT     | 4.5e+000 | 48 (0.7%)  | ZMYM3   |      |
| ATCAAAGATGGA    | 4.5e+000 | 37 (0.6%)  | ZNF740  | C2H2 |
| CTATAACCAG      | 4.5e+000 | 44 (0.7%)  | ZBTB12  | C2H2 |
| AACTCACTTCAATTT | 4.5e+000 | 30 (0.5%)  | ZNF583  | C2H2 |
| AAATAAAATGAAG   | 4.7e+000 | 70 (1.1%)  | HMGA2   |      |
| AAAATGTAAATA    | 4.7e+000 | 97 (1.5%)  | ZNF507  | C2H2 |
| CCATGGAAGA      | 4.7e+000 | 135 (2.0%) | ZNF8    | C2H2 |

|                 |          |            |        |      |
|-----------------|----------|------------|--------|------|
| TAATAAAATAAAATA | 5.0e+000 | 85 (1.3%)  | HMGA2  |      |
| CATAGAAAATTAAGA | 5.0e+000 | 61 (0.9%)  | ZNF146 | C2H2 |
| AGAAGCCTTG      | 5.0e+000 | 55 (0.8%)  | RAD21  |      |
| AGATTGAGAGAA    | 5.0e+000 | 43 (0.6%)  | CTCF   | C2H2 |
| ATCTACAAA       | 6.6e+000 | 285 (4.3%) |        |      |
| AATTATGAAT      | 6.6e+000 | 99 (1.5%)  | ZNF292 | C2H2 |
| AAATATTCCCAA    | 9.0e+000 | 67 (1.0%)  | ZNF558 | C2H2 |
| GTTAKTGGTAATTTM | 9.0e+000 | 48 (0.7%)  | ZNF416 | C2H2 |
| AAAGGGTAAAA     | 1.5e+001 | 201 (3.0%) | CTCF   | C2H2 |

| <b>GSE32521_AuNP</b> |                |                   |             |              |
|----------------------|----------------|-------------------|-------------|--------------|
| <b>Motif</b>         | <b>E-value</b> | <b>Factorbook</b> | <b>TYPE</b> | <b>Sites</b> |
| GAAAAATTGAAA         | 2.2e+000       | CTCF              | C2H2        | 35 (49.3%)   |
| CTGAAACS             | 2.3e+000       | EP300             |             | 38 (53.5%)   |
| GGGGGGGRGGRGGAA      | 3.0e+000       | HNRNPK            |             | 25 (35.2%)   |

| <b>GSE70509_AgNO3</b> |                   |             |              |
|-----------------------|-------------------|-------------|--------------|
| <b>Motif</b>          | <b>Factorbook</b> | <b>TYPE</b> | <b>Sites</b> |
| AATTTAAAA             | MXI1              |             | 16 (100.0%)  |
| AGAAAAAAAAATCA        | ZNF362            |             | 12 (75.0%)   |
| AAATYGACRWG           | IRF3              |             | 13 (81.3%)   |
| GACCGA                | NR2F2             |             | 15 (93.8%)   |
| TATTCAA               | HBP1              |             | 16 (100.0%)  |

| <b>GSE70509_AgNP</b> |                   |             |              |
|----------------------|-------------------|-------------|--------------|
| <b>Motif</b>         | <b>Factorbook</b> | <b>TYPE</b> | <b>Sites</b> |
| AACTAATTWAA          | TCF4              |             | 11 (84.6%)   |
| AATMAATGA            | ZNF24             | C2H2        | 10 (76.9%)   |
| AACAAAAAAAAAY        | ZNF362            | C2H2        | 11 (84.6%)   |
| AAGTTGA              | ZNF416            | C2H2        | 13 (100.0%)  |
| AATAHATAAATTT        | ZNF19             | C2H2        | 9 (69.2%)    |

| <b>GSE70509_priAgNp</b> |                   |             |              |
|-------------------------|-------------------|-------------|--------------|
| <b>Motif</b>            | <b>Factorbook</b> | <b>TYPE</b> | <b>Sites</b> |
| AATAAAATT               | BNC2              | C2H2        | 13 (86.7%)   |
| RAAACTTTA               | ZBTB40            | C2H2        | 14 (93.3.0%) |
| AAAAWATGAAGMAH          | IKZF1             | C2H2        | 12 (80.0%)   |
| AAATTGATRAK             | CUX1              |             | 13 (86.7%)   |
| ACATACTG                | EP300             |             | 11 (73.3%)   |

| <b>NERC_AgNO3</b> |                   |             |              |
|-------------------|-------------------|-------------|--------------|
| <b>Motif</b>      | <b>Factorbook</b> | <b>TYPE</b> | <b>Sites</b> |
| AAAACCTGAAT       | ZBTB40            | C2H2        | 5 (100.0%)   |
| AAACATATTTTGA     | EP300             |             | 5 (100.0%)   |
| AATGGAAAATTG      | NFATC1            |             | 5 (100.0%)   |

|               |        |      |            |
|---------------|--------|------|------------|
| CGAAAAAAAAA   | ZNF384 | C2H2 | 5 (100.0%) |
| TTTGTCRGMHAAC | ZNF791 | C2H2 | 4 (80.0%)  |

| <b>NERC_AUT12</b> |                   |             |              |
|-------------------|-------------------|-------------|--------------|
| <b>Motif</b>      | <b>Factorbook</b> | <b>TYPE</b> | <b>Sites</b> |
| CTCCRCYW          | ZNF263            | C2H2        | 21 (65.6%)   |
| AATTCAGAA         | CEBPB             |             | 17 (53.1%)   |
| AGTATAAAA         | MTA3              |             | 19 (59.4%)   |
| ACARTTTA          | ZNF660            | C2H2        | 20 (62.5%)   |
| ATCTGCAAAAT       | GATA3             |             | 14 (43.8%)   |

| <b>NERC_MUA12</b> |                   |             |              |
|-------------------|-------------------|-------------|--------------|
| <b>Motif</b>      | <b>Factorbook</b> | <b>TYPE</b> | <b>Sites</b> |
| CTTCC             | EZH2phosphoT487   |             | 15 (100.0%)  |
| TAWAATTGAWAADGT   | JUND              |             | 12 (80.0%)   |
| ATCAAAACT         | PHF8              |             | 13 (86.7%)   |
| AAATTAACYSM       | ZNF416            | C2H2        | 10 (66.7%)   |
| CTTATCAA          | JUN               |             | 10 (66.7%)   |

| <b>NERC_PVP12</b> |                   |             |              |
|-------------------|-------------------|-------------|--------------|
| <b>Motif</b>      | <b>Factorbook</b> | <b>TYPE</b> | <b>Sites</b> |
| ATTTATTGAAT       | ZNF19             | C2H2        | 12 (100.0%)  |
| YAATTTAAAY        | MYBL2             |             | 12 (100.0%)  |
| AAAATGWCTA        |                   |             | 12 (100.0%)  |
| ATTGAACCA         | FOXP1             |             | 10 (83.3%)   |
| AATCTGAAA         | JUND              |             | 9 (75.0%)    |

| <b>NERC_PVP52</b> |                   |             |              |
|-------------------|-------------------|-------------|--------------|
| <b>Motif</b>      | <b>Factorbook</b> | <b>TYPE</b> | <b>Sites</b> |
| AAGAAGAAGTGT      | SPI1              |             | 14 (82.4%)   |
| AATAATTCAAAAT     | HMGA2             |             | 12 (70.6%)   |
| AWAATGATVA        | CUX1              |             | 12 (70.6%)   |
| TCTGGRAAAAAA      | ZNF416            | C2H2        | 12 (70.6%)   |
| TTGMKCAA          | EP300             |             | 12 (70.6%)   |

| GSE41333_G3     |          |             |                         |      |
|-----------------|----------|-------------|-------------------------|------|
| Motif           | E-value  | Sites       | Factorbook              | Type |
| AAATAAATAAAC    | 1.0e-002 | 217 (33.2%) | ZNF138                  | C2H2 |
| ATTATTATTATTAT  | 3.0e-002 | 114 (17.5%) | <a href="#">ZNF354B</a> | C2H2 |
| CYCKCCCHC       | 5.4e-002 | 142 (21.7%) | <a href="#">ZNF148</a>  | C2H2 |
| ACACACACACACACA | 1.9e-001 | 188 (28.8%) | <a href="#">ZNF148</a>  | C2H2 |
| CCAATCAGAGS     | 3.1e-001 | 108 (16.5%) | SP4                     | C2H2 |
| CTGCAG          | 3.6e-001 | 394 (60.3%) | <a href="#">CTCF</a>    | C2H2 |
| AATGAACCRCCA    | 4.0e-001 | 56 (8.6%)   | <a href="#">ZNF416</a>  | C2H2 |
| GACTAAGCYRA     | 4.0e-001 | 62 (9.5%)   | <a href="#">BACH1</a>   |      |
| ACCAATCACT      | 5.3e-001 | 84 (12.9%)  | <a href="#">USF1</a>    |      |
| CTTCATC         | 6.6e-001 | 246 (37.7%) | <a href="#">ZNF513</a>  | C2H2 |
| AAATGAATGAAWRAA | 6.7e-001 | 86 (13.2%)  | <a href="#">ZNF24</a>   | C2H2 |
| GTGACGTCAB      | 8.9e-001 | 113 (17.3%) | <a href="#">ZHX1</a>    | C2H2 |
| AAAAMAAAAAMAA   | 7.0e+000 | 76 (11.6%)  | <a href="#">ZNF362</a>  | C2H2 |
| TMAACATTTA      | 1.1e+001 | 69 (10.6%)  | <a href="#">ZNF507</a>  | C2H2 |

| GSE41333_G4     |          |              |                         |      |
|-----------------|----------|--------------|-------------------------|------|
| Motif           | E-value  | Sites        | Factorbook              | Type |
| ACACACACACACAC  | 6.1e-011 | 541 (17.6%)  | <a href="#">ZNF148</a>  | C2H2 |
| CYCKCCCMCY      | 1.2e-007 | 910 (29.7%)  | <a href="#">ZNF148</a>  | C2H2 |
| AAATAAATAAA     | 1.4e-006 | 748 (24.4%)  | <a href="#">ZNF138</a>  | C2H2 |
| ATAATAATAATAAT  | 1.9e-004 | 273 (8.9%)   | <a href="#">ZNF354B</a> | C2H2 |
| WDTAGSCTAHW     | 8.4e-004 | 373 (12.2%)  | <a href="#">CTCF</a>    | C2H2 |
| AATAAAACAAA     | 9.3e-004 | 473 (15.4%)  | <a href="#">HMGA2</a>   |      |
| CTACAGTA        | 2.5e-003 | 888 (29.0%)  | <a href="#">CTCF</a>    | C2H2 |
| RTATATATATATATA | 2.8e-003 | 217 (7.1%)   | <a href="#">ZNF426</a>  | C2H2 |
| AATGTAAT        | 4.2e-003 | 835 (27.2%)  | <a href="#">ZNF507</a>  | C2H2 |
| CCAATCAGAGB     | 9.7e-003 | 218 (7.1%)   | SP4                     | C2H2 |
| AAAAAAAAAAAAAAC | 4.8e-002 | 526 (17.2%)  | <a href="#">ZNF362</a>  | C2H2 |
| AGAGAGAGAGAGAG  | 4.9e-002 | 277 (9.0%)   | <a href="#">ZNF596</a>  | C2H2 |
| ACAGCGGAATGAACC | 8.8e-002 | 147 (4.8%)   | <a href="#">CTCF</a>    | C2H2 |
| AAWCAAACCA      | 9.5e-002 | 1983 (64.7%) | <a href="#">NR3C1</a>   |      |
| GGCGACCCC       | 1.8e-001 | 138 (4.5%)   | <a href="#">ZXDB</a>    | C2H2 |
| CAACCCAKCWCTGGG | 1.8e-001 | 99 (3.2%)    | <a href="#">ZNF707</a>  | C2H2 |
| AACATGCAAACCTCA | 1.8e-001 | 84 (2.7%)    | <a href="#">NFATC3</a>  |      |
| ACAGAAATGCCA    | 1.8e-001 | 59 (1.9%)    | <a href="#">ZFP37</a>   | C2H2 |
| CTGCAG          | 2.2e-001 | 542 (17.7%)  | CTCF                    | C2H2 |
| AAGGGATAGTTC    | 2.6e-001 | 91 (3.0%)    | <a href="#">PRDM1</a>   | C2H2 |
| ACATTTCTAA      | 3.6e-001 | 56 (1.8%)    | <a href="#">ZFP37</a>   | C2H2 |
| ATGAWGACA       | 4.0e-001 | 718 (23.4%)  | <a href="#">NR3C1</a>   |      |
| CTCCATCCM       | 4.8e-001 | 165 (5.4%)   | <a href="#">YBX1</a>    |      |
| GAGGAAACCS      | 5.1e-001 | 100 (3.3%)   | <a href="#">ZNF510</a>  | C2H2 |
| AAATAAA         | 5.5e-001 | 1525 (49.7%) | CTCF                    | C2H2 |
| GAAGAAA         | 6.4e-001 | 479 (15.6%)  | <a href="#">ARNT</a>    |      |
| AGCGCGCGCGC     | 7.3e-001 | 234 (7.6%)   | <a href="#">ZBTB26</a>  | C2H2 |
| CCTTCTTGCTGTGA  | 7.3e-001 | 70 (2.3%)    | <a href="#">CTBP1</a>   |      |
| GCATGTCTTTGGACT | 7.3e-001 | 69 (2.2%)    | <a href="#">AFF1</a>    |      |

|                 |          |              |                         |      |
|-----------------|----------|--------------|-------------------------|------|
| ACCTAGTTGARAC   | 7.3e-001 | 31 (1.0%)    | <a href="#">ZNF416</a>  | C2H2 |
| ACAACAACAACAR   | 7.9e-001 | 182 (5.9%)   | <a href="#">FOXP1</a>   |      |
| CTTCATC         | 8.6e-001 | 582 (19.0%)  | <a href="#">ZNF513</a>  | C2H2 |
| CCAAGTTATCCAGC  | 9.0e-001 | 125 (4.1%)   | <a href="#">ZNF639</a>  | C2H2 |
| CTGAAGGAM       | 9.6e-001 | 1111 (36.2%) | CTCF                    | C2H2 |
| AAACAAACAA      | 1.2e+000 | 532 (17.3%)  | <a href="#">FEZF1</a>   | C2H2 |
| AATACATTTAAT    | 1.3e+000 | 187 (6.1%)   | <a href="#">ZNF507</a>  | C2H2 |
| GCAGCAGYAG      | 1.4e+000 | 266 (8.7%)   | <a href="#">POLR2A</a>  |      |
| ATGTTTWCAGAG    | 1.5e+000 | 82 (2.7%)    | <a href="#">ZNF416</a>  | C2H2 |
| ATGATGATGRTG    | 1.5e+000 | 66 (2.2%)    | <a href="#">ATF7</a>    |      |
| CAATTCACCTRACC  | 1.5e+000 | 58 (1.9%)    | <a href="#">ZEB1</a>    |      |
| CAGAATTATTAGCCC | 1.5e+000 | 60 (2.0%)    | <a href="#">ZNF766</a>  | C2H2 |
| AGGGACTAAGCCG   | 1.6e+000 | 128 (4.2%)   | <a href="#">ZSCAN21</a> | C2H2 |
| ATGCCCTTCCAGC   | 1.6e+000 | 113 (3.7%)   | <a href="#">ZNF548</a>  | C2H2 |
| ATTAATAA        | 1.9e+000 | 434 (14.2%)  | <a href="#">ZNF140</a>  | C2H2 |
| ACGTCACCT       | 2.1e+000 | 754 (24.6%)  | <a href="#">CREM</a>    |      |
| RTAGGCCTAY      | 3.0e+000 | 52 (1.7%)    | <a href="#">ZFY</a>     | C2H2 |
| AGAGCAGAGG      | 3.4e+000 | 121 (3.9%)   | <a href="#">TCF7L2</a>  |      |
| CATTTAAAATRA    | 4.8e+000 | 161 (5.2%)   | <a href="#">ZNF507</a>  | C2H2 |

| <b>GSE50718_Ag50</b> |                |              |                        |             |
|----------------------|----------------|--------------|------------------------|-------------|
| <b>Motif</b>         | <b>E-value</b> | <b>Sites</b> | <b>Factorbook</b>      | <b>Type</b> |
| AATAAATRAATAA        | 2.3e-004       | 392 (28.8%)  | <a href="#">ZNF394</a> | C2H2        |
| AAACAAAC             | 6.2e-004       | 484 (35.6%)  | <a href="#">NR3C1</a>  |             |
| AAATACATTTT          | 1.6e-003       | 128 (9.4%)   | <a href="#">ZBTB40</a> | C2H2        |
| GGAGGAGGAGG          | 1.8e-003       | 370 (27.2%)  | <a href="#">NFXL1</a>  |             |
| GAATGAACCRCCAAC      | 1.5e-002       | 65 (4.8%)    | <a href="#">ZNF416</a> | C2H2        |
| AGAGAGAGAGAGAGA      | 3.1e-002       | 67 (4.9%)    | <a href="#">ZNF596</a> | C2H2        |
| TCCAGCYGCA           | 3.1e-002       | 42 (3.1%)    | <a href="#">SAP30</a>  |             |
| AAATGTA              | 4.3e-002       | 447 (32.9%)  | <a href="#">ZNF507</a> | C2H2        |
| GTAGCCTAT            | 1.1e-001       | 155 (11.4%)  | <a href="#">IRF3</a>   |             |
| CACACACACACACAC      | 1.3e-001       | 231 (17.0%)  | <a href="#">ZNF776</a> | C2H2        |
| CARCCAATCA           | 2.1e-001       | 158 (11.6%)  | <a href="#">E2F6</a>   |             |
| ACTGGGAAAC           | 2.7e-001       | 26 (1.9%)    | <a href="#">RBPJ</a>   |             |
| AATGAAG              | 5.4e-001       | 779 (57.3%)  | <a href="#">ZNF24</a>  | C2H2        |
| CTGTGGCGACCCC        | 5.6e-001       | 63 (4.6%)    | CTCF                   | C2H2        |
| AGTTTGCATGTTCTC      | 5.6e-001       | 49 (3.6%)    | <a href="#">HNF4A</a>  |             |
| CAGCATATGTTTTAC      | 5.6e-001       | 33 (2.4%)    | <a href="#">EP300</a>  |             |
| CCAAGTACCCAGCC       | 5.6e-001       | 32 (2.4%)    | <a href="#">ZNF639</a> | C2H2        |
| CCAGCGACC            | 6.6e-001       | 167 (12.3%)  | ZSCAN30                | C2H2        |
| GTATATATATATATA      | 6.8e-001       | 117 (8.6%)   | ZNF426                 | C2H2        |
| KTACWGTAM            | 9.1e-001       | 257 (18.9%)  | CHD7                   |             |
| GAAGAWG              | 9.6e-001       | 636 (46.8%)  | ZNF513                 | C2H2        |
| CATTTTC              | 9.6e-001       | 719 (52.9%)  | EP300                  |             |
| AAAGGGAYAGTTCA       | 1.1e+000       | 79 (5.8%)    | GATA2                  |             |
| AGGGCATCYGC          | 1.1e+000       | 50 (3.7%)    | CTCF                   | C2H2        |
| AATAAAGGGACTAAG      | 1.1e+000       | 60 (4.4%)    | ZNF264                 | C2H2        |
| TGGACTGTGGGGGAA      | 1.1e+000       | 44 (3.2%)    | NR3C1                  |             |

|                  |          |             |         |      |
|------------------|----------|-------------|---------|------|
| CCGCCC           | 1.2e+000 | 383 (28.2%) | HMG3    |      |
| AATAAATA         | 1.2e+000 | 665 (48.9%) | ZNF140  | C2H2 |
| ATTATTATTATTA    | 1.3e+000 | 110 (8.1%)  | ZNF354B | C2H2 |
| GAGGAAACCCA      | 1.3e+000 | 41 (3.0%)   | ZNF565  | C2H2 |
| AAAAAAAAAAAAAAMA | 1.3e+000 | 161 (11.8%) | ZNF384  | C2H2 |
| CTGCAGA          | 1.3e+000 | 708 (52.1%) | CTCF    | C2H2 |
| CGCSCRCKCG       | 1.5e+000 | 217 (16.0%) | ZBTB26  | C2H2 |
| GATGAC           | 1.8e+000 | 555 (40.8%) | FOS     |      |
| CWGCWG           | 1.8e+000 | 267 (19.6%) | RAD21   |      |
| AATAAARTAAT      | 6.4e+000 | 516 (37.9%) | ZNF19   | C2H2 |
| GCCTCACAGCAAGAA  | 9.5e+000 | 44 (3.2%)   | CTBP1   |      |
| AAAGTAAACA       | 3.0e+001 | 136 (10.0%) | OSR2    | C2H2 |

| GSE50718_Ag150  |          |             |                        |      |
|-----------------|----------|-------------|------------------------|------|
| Motif           | E-value  | Sites       | Factorbook             | Type |
| TGAATGAA        | 2.4e-003 | 269 (37.9%) | <a href="#">ZNF24</a>  | C2H2 |
| TACWGTA         | 1.5e-002 | 135 (19.0%) | <a href="#">CHD7</a>   |      |
| AATAAATAAATA    | 1.3e-001 | 116 (16.3%) | <a href="#">ZNF394</a> | C2H2 |
| CYCCTCCYH       | 2.5e-001 | 167 (23.5%) | <a href="#">ZNF263</a> | C2H2 |
| AATAAA          | 4.7e-001 | 630 (88.7%) | <a href="#">ARNT</a>   |      |
| AGTCAAAGACA     | 5.5e-001 | 38 (5.4%)   | <a href="#">HNF4G</a>  |      |
| GTTGCAGCTGGA    | 5.5e-001 | 32 (4.5%)   | <a href="#">ZNF146</a> |      |
| ATCCGCTGYGTAAAA | 5.5e-001 | 40 (5.6%)   | <a href="#">SMAD3</a>  |      |
| AGTTGGTGG       | 6.0e-001 | 171 (24.1%) | <a href="#">POLR2A</a> |      |
| ATGCAA          | 7.1e-001 | 152 (21.4%) | <a href="#">RELA</a>   |      |
| ACACACACACACA   | 7.4e-001 | 118 (16.6%) | <a href="#">ZNF148</a> | C2H2 |
| GCGACCCCTG      | 9.2e-001 | 74 (10.4%)  | <a href="#">TRIM22</a> |      |
| AACAAACCAA      | 9.2e-001 | 97 (13.7%)  | <a href="#">ZNF548</a> | C2H2 |
| GGAGGAAACS      | 9.2e-001 | 86 (12.1%)  | <a href="#">JUN</a>    |      |
| TAGSCTA         | 9.2e-001 | 91 (12.8%)  | CTCF                   | C2H2 |
| TCGAACCARCVAC   | 2.3e+000 | 52 (7.3%)   | <a href="#">GTF3C2</a> |      |
| GATGATGAKG      | 4.5e+000 | 155 (21.8%) | <a href="#">ZNF513</a> | C2H2 |
| ATATATATATATAT  | 4.7e+000 | 53 (7.5%)   | <a href="#">ZNF426</a> | C2H2 |

| GSE50718_AgNO3   |          |             |            |      |
|------------------|----------|-------------|------------|------|
| Motif            | E-value  | Sites       | Factorbook | Type |
| CACACACACACACA   | 2.3e-005 | 353 (14.7%) | ZNF148     | C2H2 |
| CCCCCCCCMC       | 1.8e-004 | 601 (25.0%) | ZNF148     | C2H2 |
| AAAAAAAAAAAAAAMA | 8.5e-004 | 213 (8.9%)  | ZNF362     | C2H2 |
| AAATGAATRAA      | 2.8e-003 | 470 (19.5%) | ZNF138     | C2H2 |
| KTAGCCTACHT      | 7.3e-003 | 215 (8.9%)  | ZNF770     | C2H2 |
| STGATTGGYT       | 1.3e-002 | 267 (11.1%) | E2F6       |      |
| AAATGTA          | 1.6e-002 | 882 (36.7%) | ZNF507     | C2H2 |
| CAAGAAGGTCGCTGG  | 4.5e-002 | 69 (2.9%)   | MAX        |      |
| AAATGCA          | 7.2e-002 | 621 (25.8%) | RAD21      |      |
| GAACCGCCAAC      | 7.9e-002 | 125 (5.2%)  |            |      |
| CAAACAAC         | 1.3e-001 | 550 (22.9%) | OVOL3      |      |
| ACAWACAWACAWAMW  | 1.7e-001 | 165 (6.9%)  | ZNF148     | C2H2 |

|                 |          |             |         |      |
|-----------------|----------|-------------|---------|------|
| ATATATATATATATA | 1.8e-001 | 174 (7.2%)  | ZNF426  | C2H2 |
| CTGTGGCGACCCC   | 1.8e-001 | 115 (4.8%)  | CTCF    | C2H2 |
| CCACTGMGCCACC   | 1.8e-001 | 76 (3.2%)   | TBL1XR1 |      |
| GAGGAAACCCAMGC  | 1.8e-001 | 84 (3.5%)   | KDM1A   |      |
| GGAGGA          | 2.7e-001 | 403 (16.7%) | ZNF263  | C2H2 |
| ATAATAATAA      | 3.2e-001 | 238 (9.9%)  | ZNF518A | C2H2 |
| AAGGGATAGTTCAC  | 3.6e-001 | 70 (2.9%)   | GATA2   |      |
| AGGGACTAAGCCGAA | 3.6e-001 | 108 (4.5%)  | ZSCAN21 | C2H2 |
| GAGAACATGCAAAC  | 3.6e-001 | 68 (2.8%)   | HNF4A   |      |
| RCGTCACGTGAS    | 5.2e-001 | 167 (6.9%)  | GTF2F1  |      |
| CAGCAG          | 7.1e-001 | 832 (34.6%) | RAD21   |      |
| ATGATGACAGAAT   | 7.1e-001 | 51 (2.1%)   | JUN     |      |
| AAGGGCATCYGCTG  | 7.1e-001 | 89 (3.7%)   | ZNF134  | C2H2 |
| GGCTAATAATTCTGA | 7.1e-001 | 52 (2.2%)   | ZNF766  | C2H2 |
| CTTTAAGAGCCACC  | 7.1e-001 | 35 (1.5%)   | ZNF350  | C2H2 |
| CTCTCTCTCTCTC   | 9.0e-001 | 92 (3.8%)   | ZNF596  | C2H2 |
| AAATAAATA       | 1.0e+000 | 503 (20.9%) | ZNF140  | C2H2 |
| CTKMAG          | 1.2e+000 | 733 (30.5%) | CTCF    | C2H2 |
| GATGATGA        | 1.2e+000 | 272 (11.3%) | ZNF513  | C2H2 |
| YGCGCATGCGCR    | 1.4e+000 | 51 (2.1%)   | ZNF639  | C2H2 |
| AATTCACCTGTAC   | 1.4e+000 | 37 (1.5%)   | ZEB1    | C2H2 |
| ATGGGTTGCRGCTGG | 1.4e+000 | 85 (3.5%)   | SRF     |      |
| CATGTCTTTGGAC   | 1.6e+000 | 64 (2.7%)   | AFF1    |      |
| ATAATAATAATAATA | 1.6e+000 | 141 (5.9%)  | ZNF354B | C2H2 |
| AATAAAATAAA     | 1.6e+000 | 322 (13.4%) | HMGA2   |      |
| TAACGTTA        | 2.1e+000 | 81 (3.4%)   | HOXA3   |      |
| AATAAAAGC       | 2.1e+000 | 91 (3.8%)   | NR2F2   |      |
| AGGAAG          | 2.2e+000 | 699 (29.1%) | NR2F2   |      |
| ACWACAACAA      | 2.2e+000 | 199 (8.3%)  | FOXP1   |      |
| AAAAGAAAAA      | 2.2e+000 | 135 (5.6%)  | CEBPB   |      |
| CAGCATATGTTTTAY | 2.8e+000 | 59 (2.5%)   | EP300   |      |
| AATAAAGTGCCCRGT | 2.8e+000 | 37 (1.5%)   | EP300   |      |
| ACATTTCTAAACAT  | 5.7e+000 | 38 (1.6%)   |         |      |

| GSE50718_PVP    |          |             |            |      |
|-----------------|----------|-------------|------------|------|
| Motif           | E-value  | Sites       | Factorbook | Type |
| TACWGTA         | 9.2e-002 | 92 (26.9%)  | CHD7       |      |
| CCAATCA         | 9.2e-002 | 57 (16.7%)  | RFX5       |      |
| AATAATAATWTAA   | 1.2e-001 | 113 (33.0%) | ZNF394     | c2h2 |
| GCWGCAGGW       | 1.2e-001 | 108 (31.6%) | CTCF       | c2h2 |
| CATCAT          | 1.9e-001 | 310 (90.6%) | TRIM24     |      |
| CTAAACTG        | 2.7e-001 | 141 (41.2%) | PRDM4      | c2h2 |
| AATAAATRAATAAAW | 3.7e-001 | 82 (24.0%)  | ZNF302     | c2h2 |
| CTCCTCCTC       | 3.7e-001 | 34 (9.9%)   | NFXL1      |      |
| GAGAGAGARAGAGA  | 3.7e-001 | 23 (6.7%)   | ZNF596     | c2h2 |
| AGGAAG          | 4.3e-001 | 95 (27.8%)  | NR2F2      |      |
| AGTGTGTGTGTG    | 5.8e-001 | 71 (20.8%)  | ZNF319     | c2h2 |
| AAACAAACAA      | 3.0e+000 | 72 (21.1%)  | FEZF1      | c2h2 |

|               |          |            |        |      |
|---------------|----------|------------|--------|------|
| CTCCGGTTTCCCC | 3.4e+000 | 32 (9.4%)  | ZNF37A | c2h2 |
| CCGCCACK      | 4.7e+000 | 78 (22.8%) | EGR1   | c2h2 |

| <b>GSE61186_AgNO3</b> |                |              |                   |             |
|-----------------------|----------------|--------------|-------------------|-------------|
| <b>Motif</b>          | <b>E-value</b> | <b>Sites</b> | <b>Factorbook</b> | <b>Type</b> |
| CACACACACACACA        | 2.3e-005       | 353 (14.7%)  | ZNF148            | C2H2        |
| CCCCKCCCMC            | 1.8e-004       | 601 (25.0%)  | ZNF148            | C2H2        |
| AAAAAAAAAAAAAMAA      | 8.5e-004       | 213 (8.9%)   | ZNF362            | C2H2        |
| AAATGAATRAA           | 2.8e-003       | 470 (19.5%)  | ZNF138            | C2H2        |
| KTAGCCTACHT           | 7.3e-003       | 215 (8.9%)   | ZNF770            | C2H2        |
| STGATTGGYT            | 1.3e-002       | 267 (11.1%)  | E2F6              |             |
| AAATGTA               | 1.6e-002       | 882 (36.7%)  | ZNF507            | C2H2        |
| CAAGAAGGTCGCTGG       | 4.5e-002       | 69 (2.9%)    | MAX               |             |
| AAATGCA               | 7.2e-002       | 621 (25.8%)  | RAD21             |             |
| GAACCGCCAAC           | 7.9e-002       | 125 (5.2%)   |                   |             |
| CAAACAAC              | 1.3e-001       | 550 (22.9%)  | OVOL3             |             |
| ACAWACAWACAWAMW       | 1.7e-001       | 165 (6.9%)   | ZNF148            | C2H2        |
| ATATATATATATATA       | 1.8e-001       | 174 (7.2%)   | ZNF426            | C2H2        |
| CTGTGGCGACCCC         | 1.8e-001       | 115 (4.8%)   | CTCF              | C2H2        |
| CCACTGMGCCACC         | 1.8e-001       | 76 (3.2%)    | TBL1XR1           |             |
| GAGGAAACCCAMGC        | 1.8e-001       | 84 (3.5%)    | KDM1A             |             |
| GGAGGA                | 2.7e-001       | 403 (16.7%)  | ZNF263            | C2H2        |
| ATAATAATAA            | 3.2e-001       | 238 (9.9%)   | ZNF518A           | C2H2        |
| AAGGGATAGTTCAC        | 3.6e-001       | 70 (2.9%)    | GATA2             |             |
| AGGGACTAAGCCGAA       | 3.6e-001       | 108 (4.5%)   | ZSCAN21           | C2H2        |
| GAGAACATGCAAAC        | 3.6e-001       | 68 (2.8%)    | HNF4A             |             |
| RCGTCACGTGAS          | 5.2e-001       | 167 (6.9%)   | GTF2F1            |             |
| CAGCAG                | 7.1e-001       | 832 (34.6%)  | RAD21             |             |
| ATGATGACAGAAT         | 7.1e-001       | 51 (2.1%)    | JUN               |             |
| AAGGGCATCYGCTG        | 7.1e-001       | 89 (3.7%)    | ZNF134            | C2H2        |
| GGCTAATAATTCTGA       | 7.1e-001       | 52 (2.2%)    | ZNF766            | C2H2        |
| CTTTAAGAGCCACC        | 7.1e-001       | 35 (1.5%)    | ZNF350            | C2H2        |
| CTCTCTCTCTCTC         | 9.0e-001       | 92 (3.8%)    | ZNF596            | C2H2        |
| AAATAATA              | 1.0e+000       | 503 (20.9%)  | ZNF140            | C2H2        |
| CTKMAG                | 1.2e+000       | 733 (30.5%)  | CTCF              | c2h2        |
| GATGATGA              | 1.2e+000       | 272 (11.3%)  | ZNF513            | c2h2        |
| YGCATGCGCR            | 1.4e+000       | 51 (2.1%)    | ZNF639            | c2h2        |
| AATCACCTGTAC          | 1.4e+000       | 37 (1.5%)    | ZEB1              | c2h2        |
| ATGGGTTGCRGCTGG       | 1.4e+000       | 85 (3.5%)    | SRF               |             |
| CATGTCTTTGGAC         | 1.6e+000       | 64 (2.7%)    | AFF1              |             |
| ATAATAATAATAATA       | 1.6e+000       | 141 (5.9%)   | ZNF354B           | c2h2        |
| AATAAAATAAA           | 1.6e+000       | 322 (13.4%)  | HMGA2             |             |
| TAACGTTA              | 2.1e+000       | 81 (3.4%)    | HOXA3             |             |
| AATAAAAGC             | 2.1e+000       | 91 (3.8%)    |                   |             |
| AGGAAG                | 2.2e+000       | 699 (29.1%)  | NR2F2             |             |
| ACWACAACAA            | 2.2e+000       | 199 (8.3%)   | FOXP1             |             |
| AAAAGAAAAAAAAAA       | 2.2e+000       | 135 (5.6%)   | CEBPB             |             |
| CAGCATATGTTTTAY       | 2.8e+000       | 59 (2.5%)    | EP300             |             |

AATAAAGTGGCCRG 2.8e+000 37 (1.5%) EP300  
 ACATTTCTAACAT 5.7e+000 38 (1.6%)

| <b>GSE61186_AgNP</b> |                |              |                   |             |
|----------------------|----------------|--------------|-------------------|-------------|
| <b>Motif</b>         | <b>E-value</b> | <b>Sites</b> | <b>Factorbook</b> | <b>Type</b> |
| CATTTCTGW            | 1.1e-001       | 101 (21.7%)  | FOXA1             |             |
| CCTCGTC              | 1.1e-001       | 148 (31.8%)  | ZNF263            | c2h2        |
| ACACACACACACACA      | 2.0e-001       | 97 (20.9%)   | ZNF148            | C2H2        |
| AATRAATRAATR         | 2.4e-001       | 97 (20.9%)   | ZNF19             | C2H2        |
| AGAGAGAGARAGRG       | 4.1e-001       | 50 (10.8%)   | ZNF596            | C2H2        |
| CCAAYCM              | 1.6e+000       | 170 (36.6%)  | RFX5              |             |
| AAAAWAAAAAAAAAA      | 2.4e+000       | 115 (24.7%)  | ZNF362            | C2H2        |

| <b>GSE73427_BAP</b> |                |              |                   |             |
|---------------------|----------------|--------------|-------------------|-------------|
| <b>Motif</b>        | <b>E-value</b> | <b>Sites</b> | <b>Factorbook</b> | <b>Type</b> |
| AATCAAGC            | 1.4e-001       | 45 (15.5%)   | SMARCA4           |             |
| AAAAAAAAAAAAATA     | 1.0e+000       | 67 (23.1%)   | ZNF384            | C2H2        |
| ACACACACACACR       | 2.0e+000       | 54 (18.6%)   | ZNF148            | C2H2        |
| AAATAATGA           | 3.2e+000       | 96 (33.1%)   | ZNF140            | C2H2        |

| <b>GSE73427_SiNPBAP</b> |                |              |                   |             |
|-------------------------|----------------|--------------|-------------------|-------------|
| <b>Motif</b>            | <b>E-value</b> | <b>Sites</b> | <b>Factorbook</b> | <b>Type</b> |
| CCCTCCCC                | 2.9e-002       | 111 (20.5%)  | ZNF444            | C2H2        |
| AAATGAATGAAT            | 3.9e-002       | 56 (10.3%)   | ZNF24             | C2H2        |
| CACACACACACAC           | 1.7e+000       | 77 (14.2%)   | ZNF148            | C2H2        |
| CACTTCCA                | 2.5e+000       | 111 (20.5%)  | YY1               | C2H2        |
| AAAHAAATAAWAAA          | 4.1e+000       | 116 (21.4%)  | ZNF34             | C2H2        |

| <b>GSE73427_SiNP</b> |                |              |                   |             |
|----------------------|----------------|--------------|-------------------|-------------|
| <b>Motif</b>         | <b>E-value</b> | <b>Sites</b> | <b>Factorbook</b> | <b>Type</b> |
| CACACACACATAY        | 1.4e-001       | 59 (16.5%)   | ZNF776            | C2H2        |
| AAATGAA              | 1.7e-001       | 198 (55.5%)  | JUNB              |             |
| AAAATAATGA           | 2.2e-001       | 121 (33.9%)  | ZNF24             | C2H2        |
| CTCBTCC              | 2.5e-001       | 229 (64.1%)  | ZNF263            | C2H2        |
| AAACATTTA            | 3.4e-001       | 122 (34.2%)  | EP300             |             |
| ACTACAGCA            | 4.6e-001       | 111 (31.1%)  | CTCF              | C2H2        |
| CAAAAAAAAAAAAA       | 4.6e-001       | 65 (18.2%)   | ZNF362            | C2H2        |
| GATGAA               | 5.1e-001       | 294 (82.4%)  | YEATS4            |             |
| WDTAGSCTAHW          | 1.9e+000       | 54 (15.1%)   | CTCF              | C2H2        |
| TAAAGTAAT            | 3.4e+000       | 50 (14.0%)   | CTCF              | C2H2        |
| CTTGTTGATGT          | 3.7e+000       | 61 (17.1%)   | FOXP1             |             |
