# Supplementary material for: A gene regulation model reveals an ancestral adaptation response to particulate exposure triggered by nanomaterials
Source: Research Square preprint supplement (doi:10.21203/rs.3.rs-1547187/v1), 2022-04-12
Supplement: Supplementary file 7 [file df96bfb16781a8a5fc499f68.pdf]

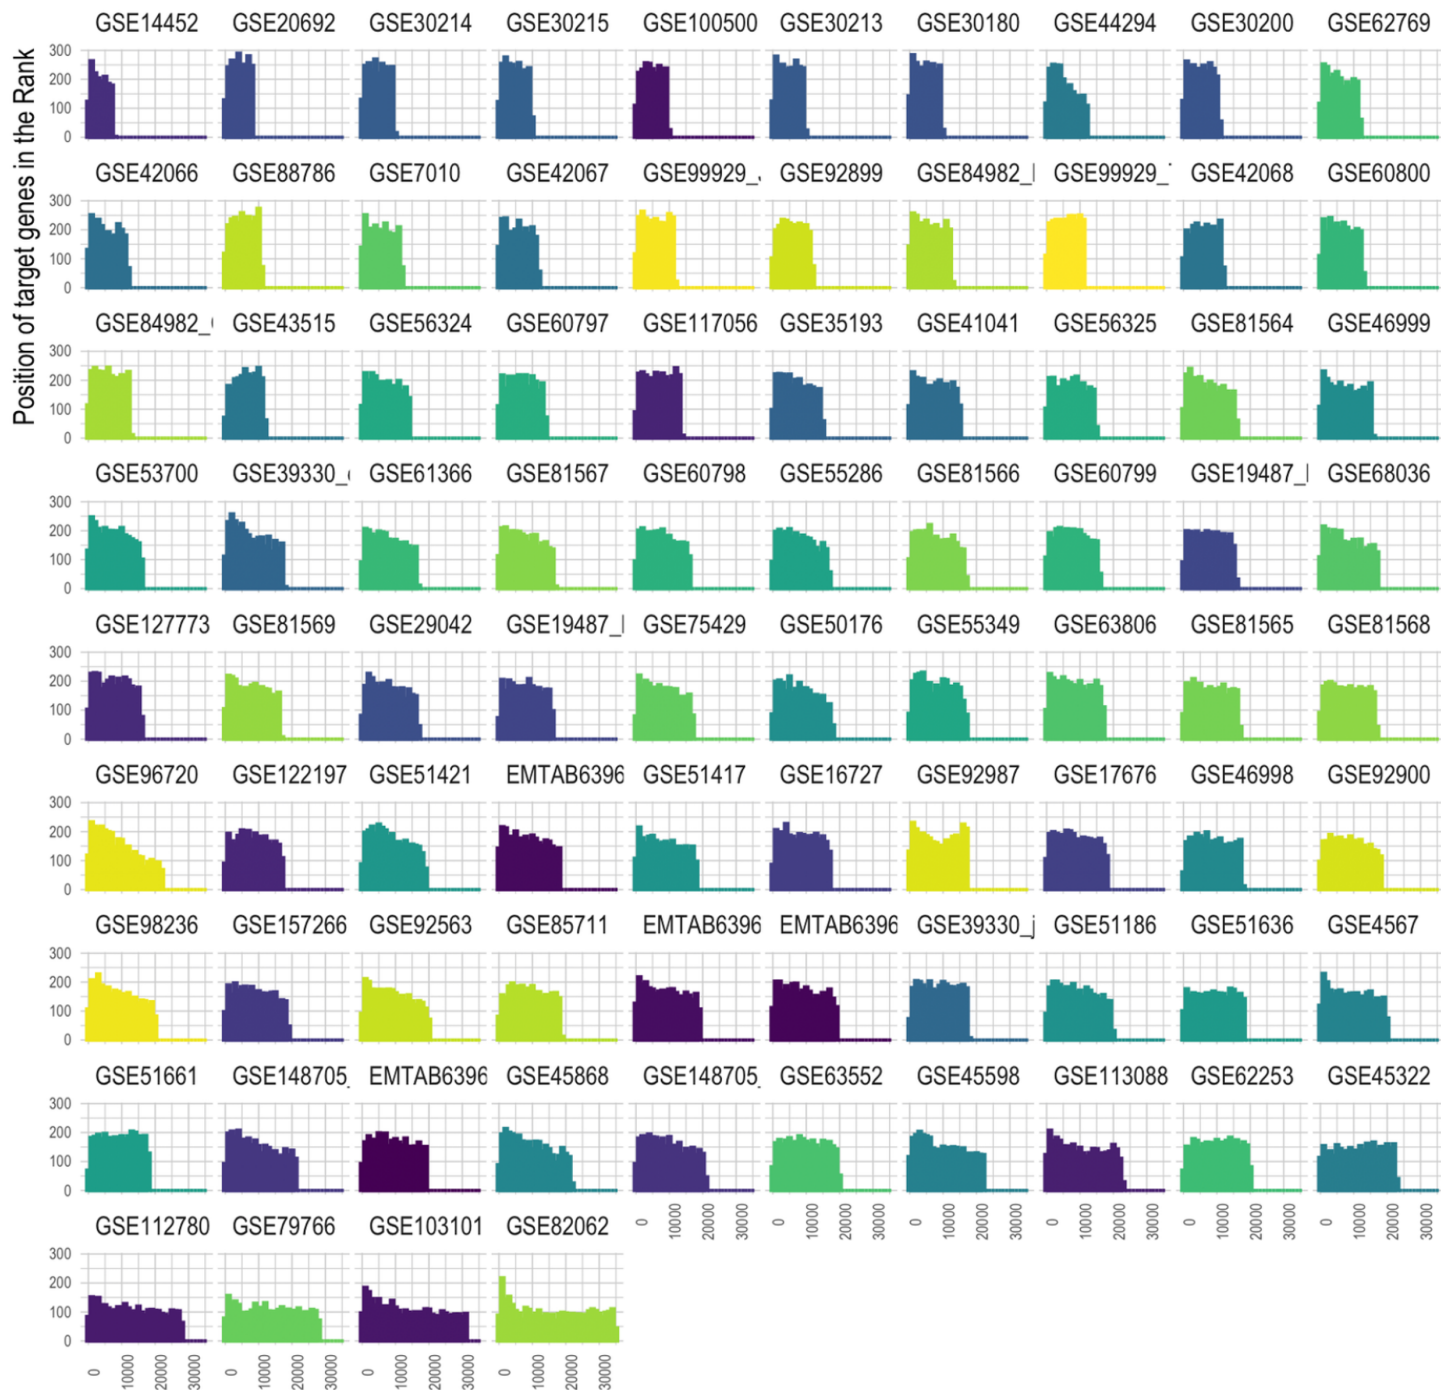

**Figure S2:** Distribution of the position of the transcripts regulated by the identified transcription factors in each dataset included and excluded from the initial pool of Säärimäki et al. Transcripts are ranked according to the p-value of the detected alteration.
