# Supplementary material for: A gene regulation model reveals an ancestral adaptation response to particulate exposure triggered by nanomaterials
Source: Research Square preprint supplement (doi:10.21203/rs.3.rs-1547187/v1), 2022-04-12
Supplement: Supplementary file 8 [file e97a3ecb9d34a2eaf2227d3d.pdf]

Table S4: In vivo cluster long term post exposure gene list

ENSG00000166851  
ENSG00000090013  
ENSG00000088325  
ENSG00000197971  
ENSG00000168268  
ENSG00000143153  
ENSG00000121957  
ENSG00000104998  
ENSG00000165304  
ENSG00000133030  
ENSG00000147421  
ENSG00000172059  
ENSG00000137478  
ENSG00000160679  
ENSG00000159176  
ENSG00000160193  
ENSG00000136856  
ENSG00000100345  
ENSG00000197785  
ENSG00000138778  
ENSG00000138413  
ENSG00000028310  
ENSG00000108669  
ENSG00000079462  
ENSG00000197081  
ENSG00000107521  
ENSG00000132824  
ENSG00000165671  
ENSG00000158793  
ENSG00000152642  
ENSG00000165802  
ENSG00000183255  
ENSG00000173065  
ENSG00000141458  
ENSG00000135720  
ENSG00000185650  
ENSG00000204856  
ENSG00000135124  
ENSG00000113318  
ENSG00000089685  
ENSG00000087074  
ENSG00000102100  
ENSG00000123131  
ENSG00000171608

ENSG00000124523  
ENSG00000100526  
ENSG00000025434  
ENSG00000100376  
ENSG00000148481  
ENSG00000178585  
ENSG00000164292  
ENSG00000117399  
ENSG00000102103  
ENSG00000171453  
ENSG00000170312  
ENSG00000087586  
ENSG00000074603  
ENSG00000184445  
ENSG00000145214  
ENSG00000161980  
ENSG00000086475  
ENSG00000182718  
ENSG00000117395  
ENSG00000015475  
ENSG00000168078  
ENSG00000100263  
ENSG00000135932  
ENSG00000030582  
ENSG00000068078  
ENSG00000149930  
ENSG00000118507  
ENSG00000133026  
ENSG00000173559  
ENSG00000153250  
ENSG00000133789  
ENSG00000011275  
ENSG00000039523  
ENSG00000100418  
ENSG00000198431  
ENSG00000175215  
ENSG00000078061  
ENSG00000114423  
ENSG00000025770  
ENSG00000086300  
ENSG00000102606  
ENSG00000110911  
ENSG00000156958  
ENSG00000105287  
ENSG00000148908  
ENSG00000145779

ENSG00000115738  
ENSG00000080823  
ENSG00000078369  
ENSG00000161542  
ENSG00000184677  
ENSG00000010322  
ENSG00000119397  
ENSG00000101109  
ENSG00000128928  
ENSG00000152520  
ENSG00000137575  
ENSG00000154767  
ENSG00000159216  
ENSG00000110047  
ENSG00000123146  
ENSG00000125968  
ENSG00000174197  
ENSG00000116679  
ENSG00000143549  
ENSG00000160710  
ENSG00000126214  
ENSG00000137574  
ENSG00000064199  
ENSG00000071054  
ENSG00000106344  
ENSG00000132600  
ENSG00000181026  
ENSG00000123992  
ENSG00000121892  
ENSG00000153317  
ENSG00000040341  
ENSG00000145687  
ENSG00000120063  
ENSG00000148926  
ENSG00000120738  
ENSG00000100441  
ENSG00000102893  
ENSG00000071564  
ENSG00000123545  
ENSG00000134186  
ENSG00000178814  
ENSG00000165271  
ENSG00000166340  
ENSG00000125485  
ENSG00000104687  
ENSG00000197111

ENSG00000176890  
ENSG00000159147  
ENSG00000082781  
ENSG00000152291  
ENSG00000133858  
ENSG00000073111  
ENSG00000105355  
ENSG00000070081  
ENSG00000100242  
ENSG00000080546  
ENSG00000119004  
ENSG00000174371  
ENSG00000135049  
ENSG00000196141  
ENSG00000167193  
ENSG00000175662  
ENSG00000106263  
ENSG00000167775  
ENSG00000112118  
ENSG00000160299  
ENSG00000089248  
ENSG00000121691  
ENSG00000002834  
ENSG00000143384  
ENSG00000158711  
ENSG00000166224  
ENSG00000068028  
ENSG00000163660  
ENSG00000120833  
ENSG00000160050  
ENSG00000083720  
ENSG00000106080  
ENSG00000092531  
ENSG00000100417  
ENSG00000117054  
ENSG00000084676  
ENSG00000100393  
ENSG00000127980  
ENSG00000159055  
ENSG00000068079  
ENSG00000130826  
ENSG00000118900  
ENSG00000050344  
ENSG00000167967  
ENSG00000197381  
ENSG00000129351

ENSG00000027697  
ENSG00000063176  
ENSG00000126001  
ENSG00000158169  
ENSG00000142949  
ENSG00000172183  
ENSG00000142192  
ENSG00000128791  
ENSG00000120837  
ENSG00000140307  
ENSG00000148834  
ENSG00000128228  
ENSG00000099341  
ENSG00000172893  
ENSG00000011304  
ENSG00000150907  
ENSG00000088992  
ENSG00000072736  
ENSG00000011454  
ENSG00000172053  
ENSG00000102265  
ENSG00000136021  
ENSG00000111684  
ENSG00000080839  
ENSG00000085365  
ENSG00000117155  
ENSG00000058262  
ENSG00000131153  
ENSG00000113328  
ENSG00000109089  
ENSG00000072210  
ENSG00000071794  
ENSG00000165475  
ENSG00000035862  
ENSG00000198792  
ENSG00000135316  
ENSG00000163956  
ENSG00000072849  
ENSG00000160213  
ENSG00000143870  
ENSG00000166557  
ENSG00000105011  
ENSG00000182923  
ENSG00000180817  
ENSG00000050748  
ENSG00000090006

ENSG00000101187  
ENSG00000133703  
ENSG00000112972  
ENSG00000155096  
ENSG00000133606  
ENSG00000117308  
ENSG00000179958  
ENSG00000166197  
ENSG00000091436  
ENSG00000176974  
ENSG00000141447  
ENSG00000112739  
ENSG00000196154  
ENSG00000167186  
ENSG00000154743  
ENSG00000107771  
ENSG00000145901  
ENSG00000131979  
ENSG00000105993  
ENSG00000137486  
ENSG00000116459  
ENSG00000158467  
ENSG00000132950  
ENSG00000198301  
ENSG00000140416  
ENSG00000171492  
ENSG00000095787  
ENSG00000115806  
ENSG00000139436  
ENSG00000163950  
ENSG00000021574  
ENSG00000198604  
ENSG00000213281  
ENSG00000159140  
ENSG00000146232  
ENSG00000079332  
ENSG00000196781  
ENSG00000147471  
ENSG00000118503  
ENSG00000100865  
ENSG00000134109  
ENSG00000067082  
ENSG00000093000  
ENSG00000206053  
ENSG00000138613  
ENSG00000142197

ENSG00000146143  
ENSG00000168216  
ENSG00000110514  
ENSG00000141696  
ENSG00000100823  
ENSG00000134690  
ENSG00000162377  
ENSG00000158195  
ENSG00000090686  
ENSG00000170348  
ENSG00000175591  
ENSG00000131791  
ENSG00000127824  
ENSG00000044574  
ENSG00000121644  
ENSG00000104341  
ENSG00000130703  
ENSG00000104549  
ENSG00000179218  
ENSG00000140943  
ENSG00000100097  
ENSG00000100647  
ENSG00000137274  
ENSG00000134884  
ENSG00000092964  
ENSG00000100422  
ENSG00000163947  
ENSG00000143156  
ENSG00000143819  
ENSG00000169738  
ENSG00000164733  
ENSG00000179295  
ENSG00000120686  
ENSG00000198911  
ENSG00000004779  
ENSG00000187239  
ENSG00000159388  
ENSG00000115464  
ENSG00000143179  
ENSG00000118705  
ENSG00000163875  
ENSG00000111276  
ENSG00000109572  
ENSG00000116260  
ENSG00000142634
