# Supplementary material for: A gene regulation model reveals an ancestral adaptation response to particulate exposure triggered by nanomaterials
Source: Research Square preprint supplement (doi:10.21203/rs.3.rs-1547187/v1), 2022-04-12
Supplement: Supplementary file 9 [file eab42a3ed3697adc04c5ab9e.pdf]

Table S10: Reference of the optical data used to generate the Hamaker constants through the Lifschitz theory

| Material                            | References                                                                                                                                                                                                                                                                                                                                                                                                                                                                                                                                           |
|-------------------------------------|------------------------------------------------------------------------------------------------------------------------------------------------------------------------------------------------------------------------------------------------------------------------------------------------------------------------------------------------------------------------------------------------------------------------------------------------------------------------------------------------------------------------------------------------------|
| Crocidolite                         | Joseph L. Rosenholtz, Dudley T. Smith; The dielectric constant of mineral powders. <i>American Mineralogist</i> 1936;; 21 (2): 115–120.                                                                                                                                                                                                                                                                                                                                                                                                              |
|                                     | C. D. Gribble, A. J. Hall, <i>A Practical Introduction to Optical Mineralogy</i> , 1985, Springer, <a href="https://doi.org/10.1007/978-94-011-7804-4">https://doi.org/10.1007/978-94-011-7804-4</a>                                                                                                                                                                                                                                                                                                                                                 |
| CdTe                                | I. Strzalkowski, S. Joshi, C. R. Crowell, Dielectric constant and its temperature dependence for GaAs, CdTe, and ZnSe, <i>Appl. Phys. Lett.</i> 28 350 (1976), <a href="https://doi.org/10.1063/1.88755">https://doi.org/10.1063/1.88755</a>                                                                                                                                                                                                                                                                                                         |
| CeO <sub>2</sub>                    | Takenori Yamamoto, Hiroyoshi Momida, Tomoyuki Hamada, Tsuyoshi Uda, Takahisa Ohno, First-principles study of dielectric properties of cerium oxide, <i>Thin Solid Films</i> , 486 1 (2005) <a href="https://doi.org/10.1016/j.tsf.2004.11.240">https://doi.org/10.1016/j.tsf.2004.11.240</a>                                                                                                                                                                                                                                                         |
|                                     | S.Vangelista, R.Piagge, S.Ek, T.Sarnet, G.Ghidini, C.Martella, A.Lamperti, Structural, chemical and optical properties of cerium dioxide film prepared by atomic layer deposition on TiN and Si substrates, <i>Thin Solid Films</i> , 636, (2017) <a href="https://doi.org/10.1016/j.tsf.2017.05.034">https://doi.org/10.1016/j.tsf.2017.05.034</a><br>W. Liu, J. Rose, S. Plantevin, M. Auffan, J.-Y. Bottero, C. Vidaud, <i>Nanoscale</i> , 2013,5, 1658-1668, <a href="https://doi.org/10.1039/C2NR33611A">https://doi.org/10.1039/C2NR33611A</a> |
| CuO                                 | N. R. Dhineshbabu, V. Rajendran, N. Nithyavathy & R. Vetumperumal, Study of structural and optical properties of cupric oxide nanoparticles. <i>Appl Nanosci</i> 6, 933–939 (2016) <a href="https://doi.org/10.1007/s13204-015-0499-2">https://doi.org/10.1007/s13204-015-0499-2</a>                                                                                                                                                                                                                                                                 |
|                                     | P. S. Vindhya, T. Jeyasingh, and V. T. Kavitha, Dielectric properties of copper oxide nanoparticles using <i>Annona Muricata</i> leaf, <i>AIP Conference Proceedings</i> 2162, 020021 (2019); <a href="https://doi.org/10.1063/1.5130231">https://doi.org/10.1063/1.5130231</a>                                                                                                                                                                                                                                                                      |
| PLGA                                | Chaudhuri, Biswadeep, B. Mondal, and D. Bhadra. "Biocompatibility of poly (lactic-co-glycolic acid)-Graphene oxide nanoplatelets composite using cryopreserved human stem cells." <i>Chem Sci Rev Lett</i> 6 (2017): 1831-6.                                                                                                                                                                                                                                                                                                                         |
|                                     | Kondyurin, Alexey, Irina Kondyurina, and Marcela Bilek. "Biodegradable drug eluting coating of cardiovascular stents dewets and can cause thrombosis." <i>arXiv preprint arXiv:1101.0659</i> (2011)                                                                                                                                                                                                                                                                                                                                                  |
|                                     | Costa MP, Feitosa ACS, Oliveira FCE, Cavalcanti BC, Dias GG, Cactano EWS, Sales FAM, Freire VN, Di Fiore S, Fischer R, Ladeira LO, da Silva Júnior EN, Pessoa C. Encapsulation of nor-β-lapachone into poly(d,l)-lactide-co-glycolide (PLGA) microcapsules: full characterization, computational details and cytotoxic activity against human cancer cell lines. <i>Medchemcomm.</i> 2017 Sep 7;8(10):1993-2002. doi: 10.1039/c7md00196g.                                                                                                            |
|                                     | PolySciTech Division of AKINA, INC, WhitePaper: Polymer UV-Vis Absorption, <a href="http://akinainc.com/pdf/2020%20Whitepaper-%20UV-Vis%20absorbance.pdf">http://akinainc.com/pdf/2020%20Whitepaper-%20UV-Vis%20absorbance.pdf</a>                                                                                                                                                                                                                                                                                                                   |
| PMMA                                | P. Maji, Improved electrical and optical properties of a poly(methyl methacrylate) nanocomposite, <i>SPE Journal</i> , DOI:10.2417/spepro.006492                                                                                                                                                                                                                                                                                                                                                                                                     |
| Soda glass                          | All About Soda Lime Glass - Composition and Properties, <a href="https://www.thomasnet.com/articles/plant-facility-equipment/soda-lime-glass/">https://www.thomasnet.com/articles/plant-facility-equipment/soda-lime-glass/</a>                                                                                                                                                                                                                                                                                                                      |
|                                     | S.M.Karazi, I.U.Ahad, K.Y.Benyounis, <i>Laser Micromachining for Transparent Materials</i> , Reference Module in Materials Science and Materials Engineering (2017), <a href="https://doi.org/10.1016/B978-0-12-803581-8.04149-7">https://doi.org/10.1016/B978-0-12-803581-8.04149-7</a>                                                                                                                                                                                                                                                             |
|                                     | S. Karlsson, L. G. Bäck, P. Kidkhunthod, K. Lundstedt, and L. Wondraczek, Effect of TiO <sub>2</sub> on optical properties of glasses in the soda-lime-silicate system, <i>Optical Materials Express</i> 6 (2016), <a href="https://doi.org/10.1364/OME.6.001198">https://doi.org/10.1364/OME.6.001198</a>                                                                                                                                                                                                                                           |
| Graphene                            | Bellucci S, Maffucci A, Maksimenko S, Micciulla F, Migliore MD, Paddubskaya A, Pinchera D, Schettino F. Electrical Permittivity and Conductivity of a Graphene Nanoplatelet Contact in the Microwave Range. <i>Materials (Basel)</i> . 2018 Dec 11;11(12):2519. doi: 10.3390/ma11122519. PMID: 30545012; PMCID: PMC6317038.                                                                                                                                                                                                                          |
| Graphite                            | Fukushima J, Tsubaki S, Matsuzawa T, Kashimura K, Mitani T, Namioka T, Fujii S, Shinohara N, Takizawa H, Wada Y. Effect of Aspect Ratio on the Permittivity of Graphite Fiber in Microwave Heating. <i>Materials (Basel)</i> . 2018 Jan 22;11(1):169. doi: 10.3390/ma11010169. PMID: 29361758; PMCID: PMC5793667                                                                                                                                                                                                                                     |
| CNT                                 | Park SH, Thielemann P, Asbeck P, Bandaru PR. Enhanced dielectric constants and shielding effectiveness of, uniformly dispersed, functionalized carbon nanotube composites. <i>Applied Physics Letters</i> . 2009 Jun 15;94(24):243111. <a href="https://doi.org/10.1063/1.3156032">https://doi.org/10.1063/1.3156032</a>                                                                                                                                                                                                                             |
| CarbonAmorph                        | M. Gioti, S. Logothetidis, Dielectric function, electronic properties and optical constants of amorphous carbon and carbon nitride films, <i>Diamond and Related Materials</i> 12 (2003), <a href="https://doi.org/10.1016/S0925-9635(02)00222-4">https://doi.org/10.1016/S0925-9635(02)00222-4</a>                                                                                                                                                                                                                                                  |
| Diamond                             | CVD Diamond, <a href="http://www.cvd-diamond.com/properties_en.htm">http://www.cvd-diamond.com/properties_en.htm</a>                                                                                                                                                                                                                                                                                                                                                                                                                                 |
|                                     | Ramanathan, K.G. The absorption of ultraviolet radiation by diamond. <i>Proc. Indian Acad. Sci. (Math. Sci.)</i> 24, 137 (1946). <a href="https://doi.org/10.1007/BF03170748">https://doi.org/10.1007/BF03170748</a>                                                                                                                                                                                                                                                                                                                                 |
| CoCl <sub>2</sub>                   | <a href="https://refractiveindex.info/">https://refractiveindex.info/</a>                                                                                                                                                                                                                                                                                                                                                                                                                                                                            |
| Cristobalite                        | <a href="https://refractiveindex.info/">https://refractiveindex.info/</a>                                                                                                                                                                                                                                                                                                                                                                                                                                                                            |
| Magnetite                           | <a href="https://refractiveindex.info/">https://refractiveindex.info/</a>                                                                                                                                                                                                                                                                                                                                                                                                                                                                            |
| Metal (generic conductive material) | <a href="https://refractiveindex.info/">https://refractiveindex.info/</a>                                                                                                                                                                                                                                                                                                                                                                                                                                                                            |
| SiO <sub>2</sub> Amorphous          | <a href="https://refractiveindex.info/">https://refractiveindex.info/</a>                                                                                                                                                                                                                                                                                                                                                                                                                                                                            |
| TiO <sub>2</sub> Anatase            | <a href="https://refractiveindex.info/">https://refractiveindex.info/</a>                                                                                                                                                                                                                                                                                                                                                                                                                                                                            |
| TiO <sub>2</sub> Rut5 Ana5          | <a href="https://refractiveindex.info/">https://refractiveindex.info/</a>                                                                                                                                                                                                                                                                                                                                                                                                                                                                            |
| TiO <sub>2</sub> Rut815 Ana815      | <a href="https://refractiveindex.info/">https://refractiveindex.info/</a>                                                                                                                                                                                                                                                                                                                                                                                                                                                                            |
| ZnO                                 | <a href="https://refractiveindex.info/">https://refractiveindex.info/</a>                                                                                                                                                                                                                                                                                                                                                                                                                                                                            |

---

---
