# Supplementary material for: A gene regulation model reveals an ancestral adaptation response to particulate exposure triggered by nanomaterials
Source: Research Square preprint supplement (doi:10.21203/rs.3.rs-1547187/v1), 2022-04-12
Supplement: Supplementary file 10 [file fa7c9a7c619362b2ce4e695b.pdf]

Table S7: List of GSE included and excluded from the analysis.

| Sample    | Citation            | doi                                                                                         |
|-----------|---------------------|---------------------------------------------------------------------------------------------|
| EMTAB6396 | Scala & Kinaret e   | 10.1016/j.impact.2018.05.003                                                                |
| GSE103101 | missing citation    |                                                                                             |
| GSE112780 | Snyder-Talkington   | 10.1080/15287394.2016.1159635                                                               |
| GSE113088 | Vis et al. 2018 [8  | 10.1021/acsnano.8b03363                                                                     |
| GSE117056 | missing citation    |                                                                                             |
| GSE122197 | Ilves et al. 2019 [ | 10.1186/s12989-019-0309-1                                                                   |
| GSE127773 | Kooter et al. 2019  | 10.1021/acsnano.9b01823                                                                     |
| GSE148705 | Gallud et al. 2020  | <a href="https://doi.org/10.1002/advs.202002221">https://doi.org/10.1002/advs.202002221</a> |
| GSE157266 | Gallud et al. 2020  | <a href="https://doi.org/10.1002/advs.202002221">https://doi.org/10.1002/advs.202002221</a> |
| GSE16727  | Busch et al. 2010   | 10.1186/1471-2164-11-65                                                                     |
| GSE16727  | Busch W et al.      | 10.1186/1471-2164-11-65                                                                     |
| GSE17676  | Peng et al. 2010    | 10.1021/nl903043z                                                                           |
| GSE19487  | Halappanavar et     | 10.1002/em.20639                                                                            |
| GSE20692  | Eom et al. 2014 [   | 10.1016/j.toxlet.2014.05.019                                                                |
| GSE29042  | Dymacek & Guo,      | 10.1109/BIBM.2011.76                                                                        |
| GSE35193  | Bourdon et al. 20   | 10.1093/toxsci/kfs119                                                                       |
| GSE39330  | Tuomela et al. 20   | 10.1371/journal.pone.0068415                                                                |
| GSE41041  | Husain et al. 2013  | 10.1016/j.taap.2013.03.018                                                                  |
| GSE42066  | Tilton et al. 2014  | 10.3109/17435390.2013.803624                                                                |
| GSE42067  | Tilton et al. 2014  | 10.3109/17435390.2013.803624                                                                |
| GSE42068  | Tilton et al. 2014  | 10.3109/17435390.2013.803624                                                                |
| GSE43515  | missing citation    |                                                                                             |
| GSE45322  | Osmond-McLeod       | 10.1186/1743-8977-10-54                                                                     |
| GSE45598  | Hussien et al. 20   | 10.1002/phy2.27                                                                             |
| GSE4567   | Karoly et al. 2007  | 10.1289/ehp.9556                                                                            |
| GSE46998  | Søs Poulsen et al   | 10.1371/journal.pone.0080452                                                                |
| GSE46999  | Søs Poulsen et al   | 10.1371/journal.pone.0080452                                                                |
| GSE50176  | Rydman et al. 20    | 10.1186/s12989-014-0048-2                                                                   |
| GSE51186  | Ronzani et al. 20   | 10.1093/jac/dku122                                                                          |
| GSE51417  | Teegarden et al     | 10.1186/s12989-014-0046-4                                                                   |

|          |                           |                                |
|----------|---------------------------|--------------------------------|
| GSE51421 | Aday et al. 2014          | 10.1039/C4RA04041D             |
| GSE51636 | Chernova et al. 2017      | 10.1016/j.cub.2017.09.007      |
| GSE53700 | Fede et al. 2014          | 10.3390/ijerph110908867        |
| GSE55286 | Poulsen et al. 2014       | 10.1016/j.taap.2014.12.011     |
| GSE55349 | Bajak et al. 2015         | 10.1016/j.toxlet.2014.12.008   |
| GSE56324 | Husain et al. 2015        | 10.3109/17435390.2014.996192   |
| GSE56325 | Husain et al. 2015        | 10.3109/17435390.2014.996192   |
| GSE60797 | Williams et al. 2014      | 10.3762/bjnano.6.252           |
| GSE60798 | Halappanavar et al. 2014  | 10.1002/em.21936               |
| GSE60799 | Halappanavar et al. 2014  | 10.1002/em.21936               |
| GSE60800 | Williams et al. 2014      | 10.3762/bjnano.6.252           |
| GSE61366 | Poulsen et al. 2015       | 10.1016/j.taap.2015.01.011     |
| GSE62253 | Böhmert et al. 2014       | 10.3109/17435390.2014.980760   |
| GSE62769 | Perkins et al. 2014       | 10.1093/hmg/ddu551             |
| GSE63552 | Nymark et al. 2015        | 10.3109/17435390.2015.1017022  |
| GSE63806 | Pisani et al. 2015        | 10.1186/s12864-015-1521-5      |
| GSE68036 | Husain et al. 2015        | 10.1016/j.taap.2015.11.003     |
| GSE75429 | Rahman et al. 2017        | 10.1016/j.mrgentox.2017.08.005 |
| GSE79766 | Gao et al. 2017           | 10.1186/s12951-017-0265-6      |
| GSE81564 | Rahman et al. 2017        | 10.1093/mutage/gew048          |
| GSE81565 | Rahman et al. 2017        | 10.1093/mutage/gew048          |
| GSE81566 | Rahman et al. 2017        | 10.1093/mutage/gew048          |
| GSE81567 | Rahman et al. 2017        | 10.1093/mutage/gew048          |
| GSE81568 | Rahman et al. 2017        | 10.1093/mutage/gew048          |
| GSE81569 | Rahman et al. 2017        | 10.1093/mutage/gew048          |
| GSE82062 | Guo et al. 2017           | 10.1080/17435390.2017.1403658  |
| GSE84982 | van der Zande et al. 2016 | 10.1080/17435390.2016.1225132  |
| GSE85711 | Kinaret et al. 2016       | 10.1021/acsnano.6b05652        |
| GSE88786 | Lastra et al. 2019        | 10.33218/prnano2(4).190802.1   |
| GSE92563 | Proquin et al. 2017       | 10.1016/j.dib.2017.11.067      |
| GSE92900 | Kinaret et al. 2016       | 10.1021/acsnano.6b08650        |
| GSE92987 | Kalmodia et al. 2017      | 10.1016/j.omtn.2017.10.012     |
| GSE96720 | Li et al. 2018            | 10.1093/toxsci/kfy090          |

































---



































---



































---



































---



































---



































---



































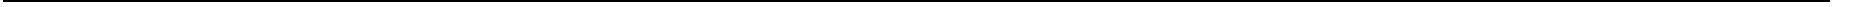



































---



































---



































---



































---



































---



































---



































---



































---



































---



































---



































---



































---



































---



































---



































---



































---



































---



































---



































---



































---



































---



































---



































\_\_\_\_\_
