# Supplementary material for: A gene regulation model reveals an ancestral adaptation response to particulate exposure triggered by nanomaterials
Source: Research Square preprint supplement (doi:10.21203/rs.3.rs-1547187/v1), 2022-04-12
Supplement: Supplementary file 11 [file fb44d2ba68131c1abafc56e3.pdf]

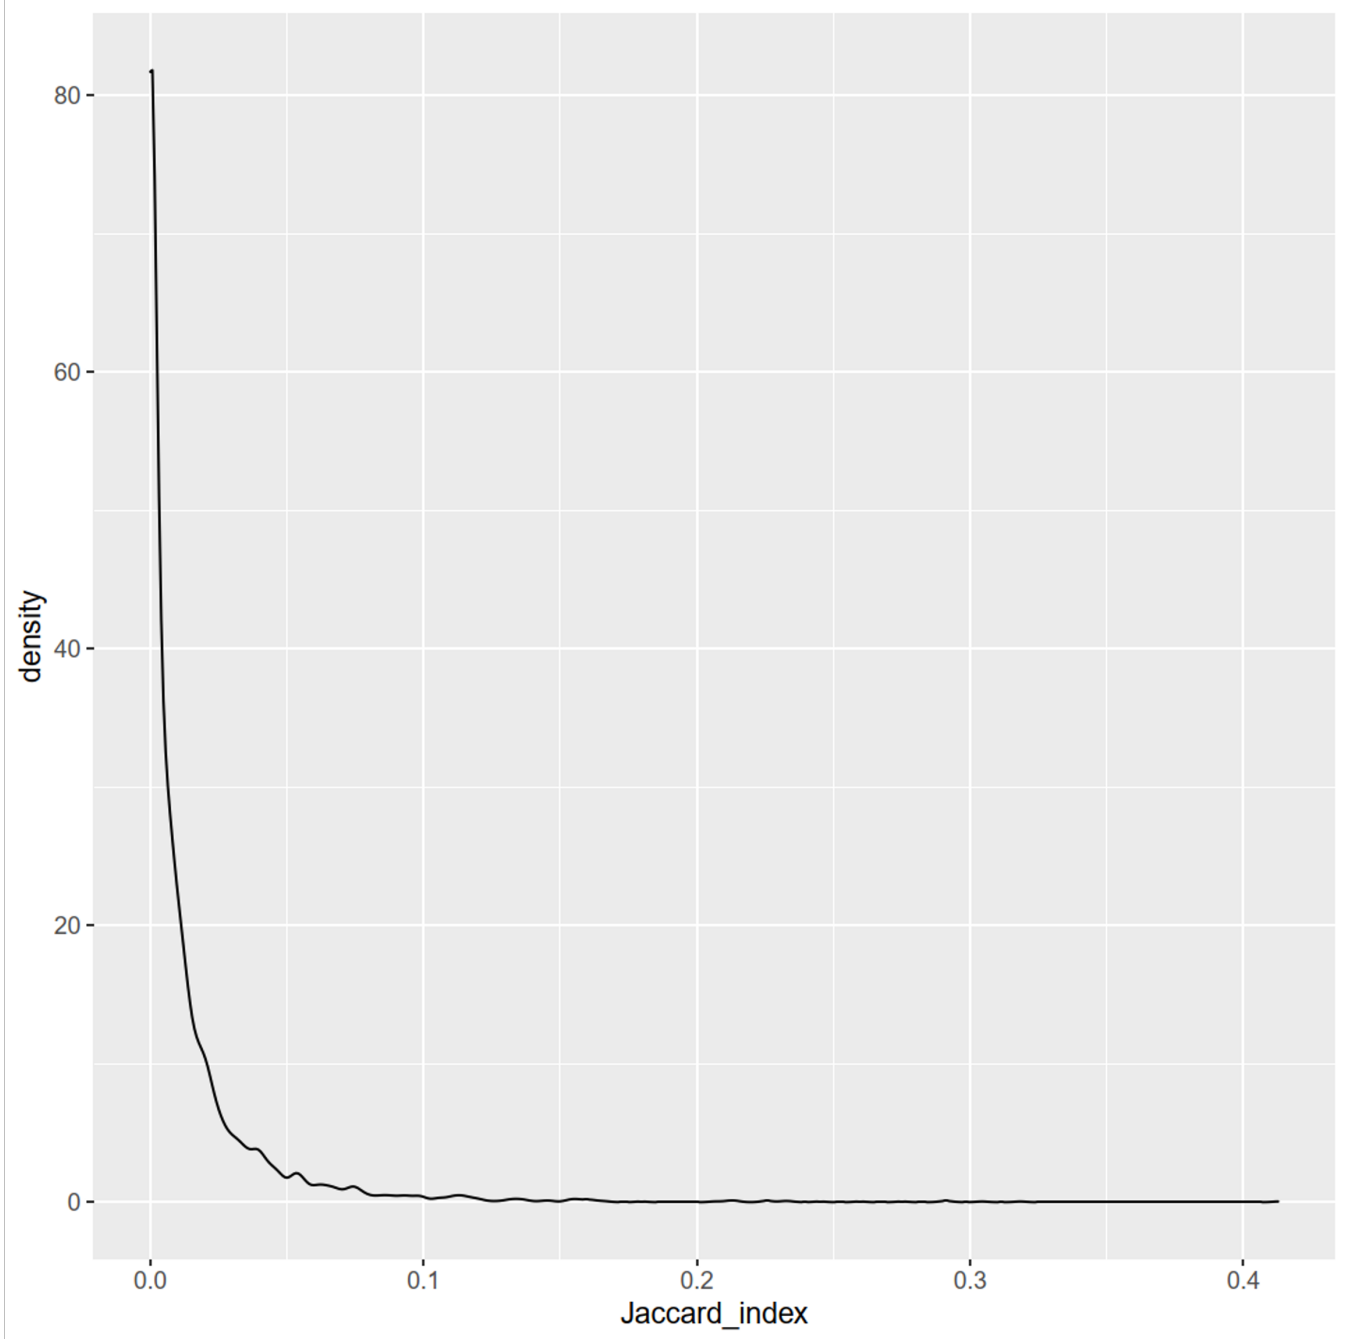

**Figure S1:** Distribution of the Jaccard index similarity values, between the differentially expressed gene lists derived from the datasets included in the collection.
